# Supplementary material for: Hydride transfer enabled switchable dearomatization of indoles in the carbocyclic ring and the pyrrole ring
Source: Royal Society of Chemistry journal article supplement (doi:10.1039/d0qo00658k), 2020-01-01

# Supporting Information

## Hydride Transfer Enabled Switchable Dearomatization of Indoles in the Carbocyclic Ring and the Pyrrole Ring

Kang Duan,<sup>†, §</sup> Hongjin Shi,<sup>†, §</sup> Lin-Xuan Wang,<sup>†</sup> Shuai-Shuai Li,<sup>\*, †</sup> Lubin Xu,<sup>†</sup> Jian Xiao<sup>\*, †, ‡</sup>

<sup>†</sup> School of Chemistry and Pharmaceutical Sciences, Qingdao Agricultural University, Qingdao, 266109, China

<sup>‡</sup> School of Marine Science and Engineering, Qingdao Agricultural University, Qingdao, 266109, China

### Table of Contents

|                                                             |            |
|-------------------------------------------------------------|------------|
| <b>1. General Information.....</b>                          | <b>S2</b>  |
| <b>2. General Procedure.....</b>                            | <b>S2</b>  |
| <b>3. Characterization of Products.....</b>                 | <b>S3</b>  |
| <b>4. Crystal Structure and Data .....</b>                  | <b>S18</b> |
| <b>5. <sup>1</sup>H and <sup>13</sup>C NMR Spectra.....</b> | <b>S20</b> |

## 1. General Information

Unless otherwise noted, all reagents and solvents were purchased from the commercial sources and used as received. Thin layer chromatography (TLC) was used to monitor the reaction on Merck 60 F254 precoated silica gel plate (0.2 mm thickness). TLC spots were visualized by UV-light irradiation on Spectroline Model ENF-24061/F 254 nm. The products were purified by flash column chromatography (200-300 mesh silica gel) eluted with the gradient of petroleum ether and ethyl acetate. Proton nuclear magnetic resonance spectra ( $^1\text{H}$  NMR) were recorded on a Bruker 500 MHz NMR spectrometer ( $\text{CDCl}_3$  or  $\text{DMSO-d}_6$  solvent). The chemical shifts were reported in parts per million (ppm), downfield from  $\text{SiMe}_4$  ( $\delta$  0.0) and relative to the signal of chloroform-d ( $\delta$  7.26, singlet) or dimethyl sulfoxide-d<sub>6</sub> ( $\delta$  2.54, singlet). Multiplicities were afforded as: s (singlet); d (doublet); t (triplet); q (quartet); dd (doublets of doublet) or m (multiplets). The number of protons for a given resonance is indicated by nH. Coupling constants were reported as a *J* value in Hz. Carbon nuclear magnetic resonance spectra ( $^{13}\text{C}$  NMR) was referenced to the appropriate residual solvent peak. High resolution mass spectral analysis (HRMS) was performed on Waters XEVO G2 Q-TOF. All substituted 2-fluorobenzaldehydes, 4-hydroxyindole, and 4-hydroxycarbazole were purchased from adamas-beta. All *o*-aminobenzaldehydes and 2-ary-4-hydroxyindoles were prepared according to literature.<sup>1,2</sup>

## 2. General Procedure

### 2.1 General Procedure for the Dearomatization of 4-Hydroxyindoles in the Carbocyclic Ring

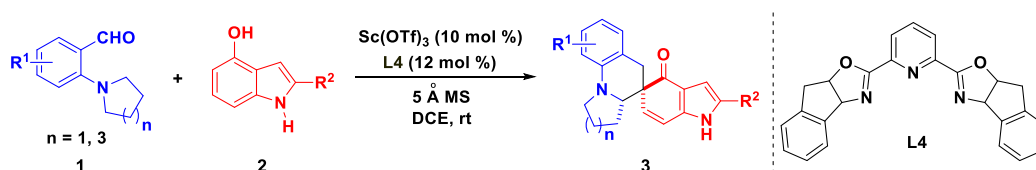

A reaction tube was charged with *o*-aminobenzaldehyde **1** (0.1 mmol), 4-hydroxyindole **2** (0.12 mmol), Sc(OTf)<sub>3</sub> (10 mol %), **L4** (12 mol %), 5 Å MS (60 mg) and DCE (1.0 mL). The mixture was stirred at room temperature under an air atmosphere. Upon completion of the reaction as indicated by TLC analysis, the reaction mixture was concentrated in vacuum and the residue was directly purified by flash column chromatography on silica gel (eluent: ethyl acetate/petroleum ether, 1:3) to afford the desired dearomatized indole **3**.

### 2.2 General Procedure for the Dearomatization of 4-hydroxycarbazoles in the Carbocyclic Ring

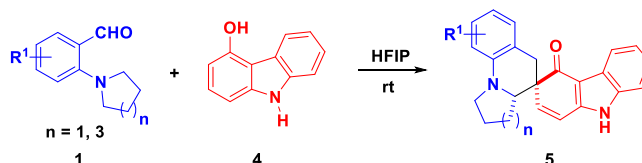

A reaction tube was charged with *o*-aminobenzaldehyde **1** (0.1 mmol), 4-hydroxycarbazole **4** (0.1 mmol), and HFIP (1.0 mL). The mixture was stirred at room temperature under an air atmosphere. Upon completion of the reaction as indicated by TLC analysis, the mixture was concentrated in vacuum and the residue was directly purified by flash column chromatography on silica gel (eluent:

ethyl acetate/petroleum ether, 1:3) to afford the desired dearomatized carbazole **5**.

### 2.3 General Procedure for the Dearomatization of the Pyrrole Ring of OH protected 4-Hydroxyindoles

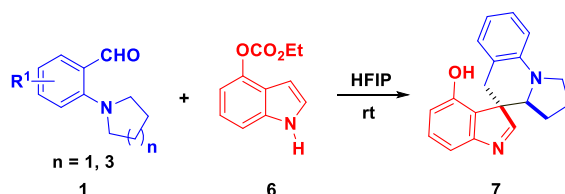

A reaction tube was charged with *o*-aminobenzaldehyde **1** (0.1 mmol), 4-hydroxycarbazole **6** (0.1 mmol), and HFIP (2.0 mL). The mixture was stirred at room temperature under an air atmosphere. Upon completion of the reaction as indicated by TLC analysis, the mixture was concentrated in vacuum and the residue was directly purified by flash column chromatography on silica gel (eluent: ethyl acetate/petroleum ether, 1:3) to afford the desired spiroindolenine **7**.

### 3. Characterization of Products

#### 1',2',3',3a'-tetrahydro-5'*H*-spiro[indole-5,4'-pyrrolo[1,2-*a*]quinolin]-4(1*H*)-one (**3a**)

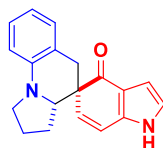

Flash column chromatography on a silica gel (ethyl acetate: petroleum ether, 1:3) afforded the product (27.6 mg, 95% yield, dr >20:1) as a yellow solid.

**<sup>1</sup>H NMR** (500 MHz, DMSO)  $\delta$  11.62 (s, 1H), 7.08 (t,  $J = 7.6$  Hz, 1H), 7.01 (d,  $J = 7.4$  Hz, 1H), 6.93 (s, 1H), 6.74 (d,  $J = 9.9$  Hz, 1H), 6.61 – 6.49 (m, 2H), 6.43 (s, 1H), 5.61 (d,  $J = 9.9$  Hz, 1H), 3.69 (dd,  $J = 9.8, 5.8$  Hz, 1H), 3.48 (t,  $J = 7.8$  Hz, 1H), 3.21 (d,  $J = 15.6$  Hz, 1H), 3.09 (dd,  $J = 16.6, 9.0$  Hz, 1H), 2.54 (s, 1H), 1.89 (ddd,  $J = 15.9, 8.7, 5.4$  Hz, 2H), 1.68 (dt,  $J = 11.8, 5.9$  Hz, 1H), 1.18 (dd,  $J = 19.6, 10.2$  Hz, 1H); **<sup>13</sup>C NMR** (126 MHz, DMSO)  $\delta$  195.6, 143.3, 140.3, 134.1, 129.3, 127.8, 121.8, 119.808, 119.2, 117.8, 115.4, 110.9, 105.5, 64.7, 48.1, 47.5, 39.1, 27.6, 23.5. **HRMS (ESI)**: calcd. for C<sub>19</sub>H<sub>19</sub>N<sub>2</sub>O [M+H]<sup>+</sup>: 291.1492, found: 291.1495.

#### 8'-methyl-1',2',3',3a'-tetrahydro-5'*H*-spiro[indole-5,4'-pyrrolo[1,2-*a*]quinolin]-4(1*H*)-one (**3b**)

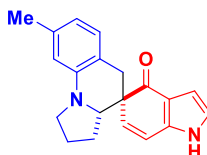

Flash column chromatography on a silica gel (ethyl acetate: petroleum ether, 1:3) afforded the product (28.3 mg, 93% yield, dr >20:1) as a yellow solid.

**<sup>1</sup>H NMR** (500 MHz, CDCl<sub>3</sub>)  $\delta$  8.93 (s, 1H), 6.92 (d,  $J = 7.5$  Hz, 1H), 6.82 – 6.75 (m, 1H), 6.64 (s, 1H), 6.59 (d,  $J = 10.0$  Hz, 1H), 6.43 (d,  $J = 7.5$  Hz, 1H), 6.35 (s, 1H), 5.86 (d,  $J = 10.0$  Hz, 1H), 3.87 (dd,  $J = 9.9, 5.5$  Hz, 1H), 3.48 (td,  $J = 8.7, 2.6$  Hz, 1H), 3.42 (d,  $J = 15.5$  Hz, 1H), 3.17 (dt,  $J = 16.4, 8.2$  Hz, 1H), 2.61 (d,  $J = 15.6$  Hz, 1H), 2.31 (s, 3H), 1.98 – 1.80 (m, 3H), 1.29 (dd,  $J = 12.6, 5.1$  Hz, 1H); **<sup>13</sup>C NMR** (126 MHz, CDCl<sub>3</sub>)  $\delta$  197.2, 142.9, 140.5, 137.1, 136.1, 128.9, 120.3, 119.5, 116.9, 116.2, 116.0, 111.0,

106.2, 64.7, 49.3, 47.1, 39.0, 27.5, 23.5, 21.6. **HRMS (ESI)**: calcd. for C<sub>20</sub>H<sub>21</sub>N<sub>2</sub>O [M+H]<sup>+</sup>: 305.1648, found: 305.1640.

**8'-(trifluoromethyl)-1',2',3',3a'-tetrahydro-5'H-spiro[indole-5,4'-pyrrolo[1,2-*a*]quinolin]-4(1*H*)-one (3c)**

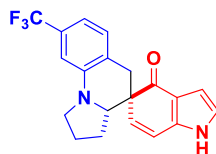

Flash column chromatography on a silica gel (ethyl acetate: petroleum ether, 1:3) afforded the product (16.1 mg, 45% yield, dr >20:1) as a white solid.

**<sup>1</sup>H NMR** (500 MHz, CDCl<sub>3</sub>) δ 8.54 (s, 1H), 7.11 (d, *J* = 7.7 Hz, 1H), 6.82 (d, *J* = 8.3 Hz, 2H), 6.69 (s, 2H), 6.63 (d, *J* = 10.0 Hz, 1H), 5.78 (d, *J* = 9.9 Hz, 1H), 3.90 (dd, *J* = 10.0, 5.5 Hz, 1H), 3.53 (t, *J* = 8.0 Hz, 1H), 3.47 (d, *J* = 15.9 Hz, 1H), 3.20 (dd, *J* = 16.7, 8.5 Hz, 1H), 2.67 (d, *J* = 16.0 Hz, 1H), 1.96 (dd, *J* = 17.2, 9.8 Hz, 2H), 1.91 – 1.80 (m, 1H), 1.38 – 1.21 (m, 1H); **<sup>13</sup>C NMR** (126 MHz, CDCl<sub>3</sub>) δ 196.3, 143.0, 140.1, 135.2, 129.8, 129.3, 126.8 (q, *J* = 273.4 Hz), 123.5, 120.4, 119.6, 116.6, 111.5 (q, *J* = 3.8 Hz), 106.6, 106.4 (q, *J* = 5.0 Hz), 64.8, 48.4, 47.2, 39.1, 27.5, 23.5. **HRMS (ESI)**: calcd. for C<sub>20</sub>H<sub>18</sub>F<sub>3</sub>NO<sub>3</sub> [M+H]<sup>+</sup>: 359.1366, found: 359.1370.

**8'-chloro-1',2',3',3a'-tetrahydro-5'H-spiro[indole-5,4'-pyrrolo[1,2-*a*]quinolin]-4(1*H*)-one (3d)**

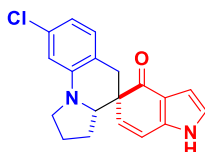

Flash column chromatography on a silica gel (ethyl acetate: petroleum ether, 1:3) afforded the product (18.9 mg, 58% yield, dr >20:1) as a white solid.

**<sup>1</sup>H NMR** (500 MHz, DMSO) δ 11.64 (s, 1H), 7.01 (d, *J* = 7.7 Hz, 1H), 6.94 (s, 1H), 6.75 (d, *J* = 9.9 Hz, 1H), 6.53 (d, *J* = 7.4 Hz, 2H), 6.44 (s, 1H), 5.58 (d, *J* = 9.9 Hz, 1H), 3.70 (dd, *J* = 9.7, 5.8 Hz, 1H), 3.49 (t, *J* = 8.6 Hz, 1H), 3.14 (d, *J* = 15.8 Hz, 1H), 3.09 (d, *J* = 8.3 Hz, 1H), 2.56 (s, 1H), 1.88 (dd, *J* = 17.2, 7.8 Hz, 2H), 1.74 – 1.64 (m, 1H), 1.22 – 1.10 (m, 1H); **<sup>13</sup>C NMR** (126 MHz, DMSO) δ 195.3, 144.4, 140.3, 133.6, 132.2, 130.5, 121.9, 119.1, 118.8, 118.1, 114.6, 109.9, 105.6, 64.5, 47.7, 47.5, 38.6, 27.5, 23.5. **HRMS (ESI)**: calcd. for C<sub>19</sub>H<sub>18</sub>ClN<sub>2</sub>O [M+H]<sup>+</sup>: 325.1102, found: 325.1110.

**4-oxo-1,1',2',3',3a',4-hexahydro-5'H-spiro[indole-5,4'-pyrrolo[1,2-*a*]quinoline]-8'-carbonitrile (3e)**

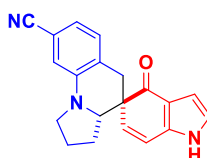

Flash column chromatography on a silica gel (ethyl acetate: petroleum ether, 1:3) afforded the product (29.0 mg, 92% yield, dr >20:1) as a reddish brown solid.

**<sup>1</sup>H NMR** (500 MHz, DMSO) δ 7.20 (d, *J* = 7.4 Hz, 1H), 6.95 (s, 1H), 6.92 (d, *J* = 7.5 Hz, 1H), 6.88 (s, 1H), 6.76 (d, *J* = 9.9 Hz, 1H), 6.44 (s, 1H), 5.53 (d, *J* = 9.9 Hz, 1H), 3.77 – 3.66 (m, 1H), 3.54 (t, *J* = 8.8 Hz, 1H), 3.21 (d, *J* = 16.2 Hz, 1H), 3.15 – 3.05 (m, 1H), 2.63 (d, *J* = 16.2 Hz, 1H), 1.89 (dd, *J* = 18.2,

8.2 Hz, 2H), 1.70 (dd,  $J = 11.7, 5.7$  Hz, 1H), 1.27 – 1.08 (m, 1H);  $^{13}\text{C}$  NMR (126 MHz, DMSO)  $\delta$  199.8, 148.3, 145.1, 137.9, 134.9, 130.5, 126.8, 126.7, 124.9, 123.8, 123.3, 123.1, 123.1, 117.7, 117.6, 115.1, 110.4, 69.3, 52.3, 51.9, 43.8, 32.3, 28.2. **HRMS (ESI)**: calcd. for  $\text{C}_{20}\text{H}_{18}\text{N}_3\text{O}$   $[\text{M}+\text{H}]^+$ : 316.1444, found: 316.1440.

**methyl(*E*)-3-(4-oxo-1',2',3',3a',4-hexahydro-5'*H*-spiro[indole-5,4'-pyrrolo[1,2-*a*]quinolin]-8'-yl)acrylate (3f)**

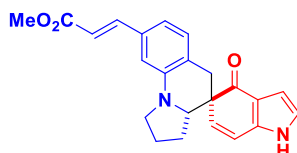

Flash column chromatography on a silica gel (ethyl acetate: petroleum ether, 1:3) afforded the product (31.8 mg, 85% yield, dr >20:1) as a white solid.

$^1\text{H}$  NMR (500 MHz,  $\text{CDCl}_3$ )  $\delta$  8.87 (s, 1H), 7.66 (d,  $J = 15.9$  Hz, 1H), 7.04 (d,  $J = 7.3$  Hz, 1H), 6.83 – 6.72 (m, 2H), 6.64 (t,  $J = 12.5$  Hz, 3H), 6.41 (d,  $J = 15.9$  Hz, 1H), 5.80 (d,  $J = 9.8$  Hz, 1H), 3.88 (s, 1H), 3.81 (s, 3H), 3.52 (t,  $J = 8.3$  Hz, 1H), 3.46 (d,  $J = 16.1$  Hz, 1H), 3.19 (d,  $J = 8.4$  Hz, 1H), 2.65 (d,  $J = 16.0$  Hz, 1H), 2.01 – 1.88 (m, 2H), 1.87 – 1.78 (m, 1H), 1.29 (d,  $J = 10.3$  Hz, 1H);  $^{13}\text{C}$  NMR (126 MHz,  $\text{CDCl}_3$ )  $\delta$  200.9, 172.8, 143.3, 129.3, 127.8, 119.0, 115.3, 110.3, 99.3, 98.8, 74.4, 62.3, 46.7, 42.1, 37.3, 27.9, 25.9, 23.4. **HRMS (ESI)**: calcd. for  $\text{C}_{23}\text{H}_{23}\text{N}_2\text{O}_3$   $[\text{M}+\text{H}]^+$ : 375.1703, found: 375.1705.

**8'-((4-methoxyphenyl)ethynyl)-1',2',3',3a'-tetrahydro-5'*H*-spiro[indole-5,4'-pyrrolo[1,2-*a*]quinolin]-4(1*H*)-one (3g)**

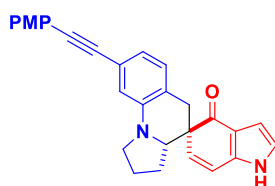

Flash column chromatography on a silica gel (ethyl acetate: petroleum ether, 1:3) afforded the product (21.0 mg, 50% yield, dr >20:1) as a white solid.

$^1\text{H}$  NMR (500 MHz, DMSO)  $\delta$  11.63 (s, 1H), 7.48 (d,  $J = 8.6$  Hz, 2H), 7.04 (d,  $J = 7.6$  Hz, 1H), 6.98 (d,  $J = 8.6$  Hz, 2H), 6.93 (s, 1H), 6.75 (d,  $J = 9.9$  Hz, 1H), 6.69 (d,  $J = 7.6$  Hz, 1H), 6.63 (s, 1H), 6.43 (s, 1H), 5.59 (d,  $J = 9.9$  Hz, 1H), 3.79 (s, 3H), 3.70 (dd,  $J = 9.8, 5.7$  Hz, 1H), 3.52 (t,  $J = 8.2$  Hz, 1H), 3.19 (d,  $J = 15.9$  Hz, 1H), 3.12 (dd,  $J = 16.7, 9.0$  Hz, 1H), 2.56 (d,  $J = 16.0$  Hz, 1H), 1.96 – 1.81 (m, 2H), 1.68 (dt,  $J = 11.5, 5.7$  Hz, 1H), 1.18 (dd,  $J = 18.7, 11.2$  Hz, 1H).  $^{13}\text{C}$  NMR (126 MHz, DMSO)  $\delta$  195.3, 159.8, 143.2, 140.4, 133.8, 133.3, 129.5, 121.8, 121.8, 120.8, 119.1, 118.4, 118.0, 114.8, 112.8, 105.5, 89.6, 88.4, 64.6, 55.7, 47.8, 47.4, 39.1, 27.5, 23.5. **HRMS (ESI)**: calcd. for  $\text{C}_{28}\text{H}_{25}\text{N}_2\text{O}_2$   $[\text{M}+\text{H}]^+$ : 421.1911, found: 421.1915.

**8'-(thiophen-2-yl)-1',2',3',3a'-tetrahydro-5'*H*-spiro[indole-5,4'-pyrrolo[1,2-*a*]quinolin]-4(1*H*)-one (3h)**

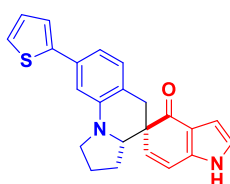

Flash column chromatography on a silica gel (ethyl acetate: petroleum ether, 1:3) afforded the product (18.9 mg, 51% yield, dr >20:1) as a brown solid.

**<sup>1</sup>H NMR** (500 MHz, DMSO)  $\delta$  11.64 (s, 1H), 7.59 – 7.47 (m, 1H), 7.45 (s, 1H), 7.12 (s, 1H), 7.05 (d,  $J$  = 7.5 Hz, 1H), 6.95 (s, 1H), 6.82 (d,  $J$  = 7.5 Hz, 1H), 6.76 (s, 2H), 6.45 (s, 1H), 5.65 (d,  $J$  = 9.9 Hz, 1H), 3.80 – 3.68 (m, 1H), 3.58 (t,  $J$  = 8.4 Hz, 1H), 3.26 – 3.11 (m, 2H), 2.56 (d,  $J$  = 15.8 Hz, 1H), 1.90 (d,  $J$  = 22.7 Hz, 2H), 1.74 – 1.65 (m, 1H), 1.21 (dd,  $J$  = 21.2, 10.7 Hz, 1H); **<sup>13</sup>C NMR** (126 MHz, DMSO)  $\delta$  195.5, 144.9, 143.6, 140.3, 134.0, 133.4, 129.9, 128.7, 125.2, 123.4, 121.8, 119.8, 119.2, 117.9, 113.0, 107.6, 105.6, 64.7, 48.2, 47.5, 38.9, 27.6, 23.5. **HRMS (ESI)**: calcd. for C<sub>23</sub>H<sub>21</sub>N<sub>2</sub>OS [M+H]<sup>+</sup>: 373.1369, found: 373.1372.

### 7'-chloro-1',2',3',3a'-tetrahydro-5'H-spiro[indole-5,4'-pyrrolo[1,2-a]quinolin]-4(1H)-one (3i)

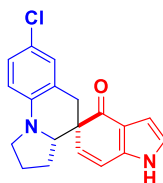

Flash column chromatography on a silica gel (ethyl acetate: petroleum ether, 1:3) afforded the product (26.6 mg, 82% yield, dr >20:1) as a yellow solid.

**<sup>1</sup>H NMR** (500 MHz, DMSO)  $\delta$  11.65 (s, 1H), 7.10 (d,  $J$  = 8.2 Hz, 2H), 6.94 (s, 1H), 6.76 (d,  $J$  = 9.8 Hz, 1H), 6.53 (d,  $J$  = 8.3 Hz, 1H), 6.44 (s, 1H), 5.57 (d,  $J$  = 9.8 Hz, 1H), 3.76 – 3.62 (m, 1H), 3.48 (t,  $J$  = 8.3 Hz, 1H), 3.17 (d,  $J$  = 15.8 Hz, 1H), 3.12 – 3.00 (m, 1H), 2.56 (d,  $J$  = 15.9 Hz, 1H), 1.87 (d,  $J$  = 21.8 Hz, 2H), 1.69 (d,  $J$  = 5.5 Hz, 1H), 1.23 – 1.09 (m, 1H); **<sup>13</sup>C NMR** (126 MHz, DMSO)  $\delta$  200.0, 146.9, 145.1, 138.4, 133.5, 133.4, 132.1, 132.1, 126.7, 126.6, 123.9, 123.5, 122.9, 122.8, 116.8, 110.3, 69.4, 52.5, 52.4, 43.5, 32.3, 28.3. **HRMS (ESI)**: calcd. for C<sub>19</sub>H<sub>18</sub>ClN<sub>2</sub>O [M+H]<sup>+</sup>: 325.1102, found: 325.1108.

### 7'-methoxy-1',2',3',3a'-tetrahydro-5'H-spiro[indole-5,4'-pyrrolo[1,2-a]quinolin]-4(1H)-one (3j)

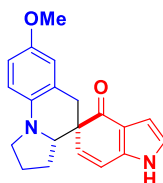

Flash column chromatography on a silica gel (ethyl acetate: petroleum ether, 1:3) afforded the product (17.6 mg, 55% yield, dr >20:1) as a yellow solid.

**<sup>1</sup>H NMR** (500 MHz, DMSO)  $\delta$  11.59 (s, 1H), 6.92 (s, 1H), 6.71 (dd,  $J$  = 17.0, 7.6 Hz, 3H), 6.49 (d,  $J$  = 8.5 Hz, 1H), 6.41 (s, 1H), 5.62 (d,  $J$  = 9.9 Hz, 1H), 3.64 (d,  $J$  = 7.6 Hz, 3H), 3.63 – 3.54 (m, 1H), 3.42 (t,  $J$  = 8.0 Hz, 1H), 3.20 (d,  $J$  = 15.8 Hz, 1H), 3.10 – 2.99 (m, 1H), 2.47 (s, 1H), 1.92 – 1.75 (m, 2H), 1.66 (dd,  $J$  = 11.9, 5.9 Hz, 1H), 1.19 – 1.08 (m, 1H); **<sup>13</sup>C NMR** (126 MHz, DMSO)  $\delta$  195.6, 150.5, 140.3, 137.9, 134.3, 121.7, 121.0, 119.2, 117.8, 115.4, 113.5, 111.9, 105.5, 64.9, 55.8, 48.7, 48.1, 39.1, 27.5, 23.6. **HRMS (ESI)**: calcd. for C<sub>20</sub>H<sub>21</sub>N<sub>2</sub>O<sub>2</sub> [M+H]<sup>+</sup>: 321.1598, found: 321.1602.

### 6'-fluoro-1',2',3',3a'-tetrahydro-5'H-spiro[indole-5,4'-pyrrolo[1,2-a]quinolin]-4(1H)-one (3k)

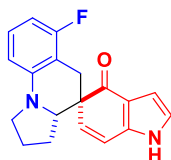

Flash column chromatography on a silica gel (ethyl acetate: petroleum ether, 1:3) afforded the product (27.7 mg, 90% yield, dr >20:1) as a yellow solid.

**<sup>1</sup>H NMR** (500 MHz, DMSO)  $\delta$  11.66 (s, 1H), 7.09 (dd,  $J = 15.1, 7.9$  Hz, 1H), 6.95 (d,  $J = 1.7$  Hz, 1H), 6.77 (d,  $J = 9.9$  Hz, 1H), 6.44 (d,  $J = 2.5$  Hz, 1H), 6.42 – 6.34 (m, 2H), 5.59 (d,  $J = 9.9$  Hz, 1H), 3.64 (dd,  $J = 9.8, 5.9$  Hz, 1H), 3.54 – 3.46 (m, 1H), 3.16 – 3.08 (m, 1H), 2.96 (d,  $J = 16.1$  Hz, 1H), 2.65 (d,  $J = 15.3$  Hz, 1H), 1.95 – 1.82 (m, 2H), 1.70 (ddd,  $J = 12.4, 7.3, 1.7$  Hz, 1H), 1.22 – 1.12 (m, 1H); **<sup>13</sup>C NMR** (126 MHz, DMSO)  $\delta$  195.2, 161.3 (d,  $J = 239.4$  Hz), 144.8 (d,  $J = 7.6$  Hz), 140.3, 133.4, 128.4 (d,  $J = 10.1$  Hz), 121.9, 119.1, 118.2, 107.0, 106.4 (d,  $J = 20.2$  Hz), 105.6, 101.8 (d,  $J = 22.7$  Hz), 64.1, 47.8, 47.2, 31.5, 27.5, 23.4. **HRMS (ESI)**: calcd. for C<sub>19</sub>H<sub>18</sub>FN<sub>2</sub>O [M+H]<sup>+</sup>: 309.1398, found: 309.1402.

### 6'-chloro-1',2',3',3a'-tetrahydro-5'H-spiro[indole-5,4'-pyrrolo[1,2-a]quinolin]-4(1H)-one (3l)

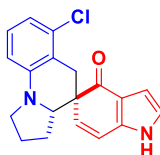

Flash column chromatography on a silica gel (ethyl acetate: petroleum ether, 1:3) afforded the product (27.5 mg, 85% yield, dr >20:1) as a yellow solid.

**<sup>1</sup>H NMR** (500 MHz, DMSO)  $\delta$  11.67 (s, 1H), 7.09 (t,  $J = 8.1$  Hz, 1H), 6.98 – 6.94 (m, 1H), 6.77 (d,  $J = 9.9$  Hz, 1H), 6.69 – 6.63 (m, 1H), 6.54 (d,  $J = 8.0$  Hz, 1H), 6.48 – 6.43 (m, 1H), 5.60 (d,  $J = 9.9$  Hz, 1H), 3.65 (dd,  $J = 9.7, 5.9$  Hz, 1H), 3.49 (td,  $J = 9.1, 2.3$  Hz, 1H), 3.14 (dd,  $J = 16.6, 9.2$  Hz, 1H), 3.01 (d,  $J = 16.4$  Hz, 1H), 2.75 (d,  $J = 16.4$  Hz, 1H), 1.97 – 1.85 (m, 2H), 1.71 (ddd,  $J = 12.2, 8.6, 3.9$  Hz, 1H), 1.21 – 1.14 (m, 1H); **<sup>13</sup>C NMR** (126 MHz, DMSO)  $\delta$  195.1, 144.6, 140.3, 133.8, 133.5, 128.5, 122.0, 119.1, 118.2, 117.1, 115.7, 109.9, 105.6, 64.0, 47.9, 47.7, 36.6, 27.5, 23.5. **HRMS (ESI)**: calcd. for C<sub>19</sub>H<sub>18</sub>ClN<sub>2</sub>O [M+H]<sup>+</sup>: 325.1102, found: 325.1104.

### 6'-bromo-1',2',3',3a'-tetrahydro-5'H-spiro[indole-5,4'-pyrrolo[1,2-a]quinolin]-4(1H)-one (3m)

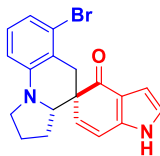

Flash column chromatography on a silica gel (ethyl acetate: petroleum ether, 1:3) afforded the product (32.4 mg, 88% yield, dr >20:1) as a yellow solid.

**<sup>1</sup>H NMR** (500 MHz, DMSO)  $\delta$  11.67 (s, 1H), 7.01 (t,  $J = 8.0$  Hz, 1H), 6.97 – 6.93 (m, 1H), 6.81 (d,  $J = 7.9$  Hz, 1H), 6.78 (d,  $J = 9.9$  Hz, 1H), 6.56 (d,  $J = 8.2$  Hz, 1H), 6.45 (s, 1H), 5.60 (d,  $J = 9.9$  Hz, 1H), 3.65 (dd,  $J = 9.7, 5.9$  Hz, 1H), 3.48 (t,  $J = 8.7$  Hz, 1H), 3.13 (dd,  $J = 16.8, 8.9$  Hz, 1H), 3.02 (d,  $J = 16.3$  Hz, 1H), 2.72 (d,  $J = 16.3$  Hz, 1H), 1.97 – 1.82 (m, 2H), 1.75 – 1.65 (m, 1H), 1.18 (dd,  $J = 14.9, 6.4$  Hz, 1H); **<sup>13</sup>C NMR** (126 MHz, DMSO)  $\delta$  195.0, 144.7, 140.3, 133.5, 129.0, 125.1, 122.0, 119.1, 118.9, 118.6, 118.2, 110.4, 105.6, 64.1, 48.2, 47.6, 39.6, 27.4, 23.5. **HRMS (ESI)**: calcd. for C<sub>19</sub>H<sub>18</sub>BrN<sub>2</sub>O [M+H]<sup>+</sup>: 369.0597, found: 369.0595.

**6'-(pyrrolidin-1-yl)-1',2',3',3a'-tetrahydro-5'H-spiro[indole-5,4'-pyrrolo[1,2-a]quinolin]-4(1H)-one (3n)**

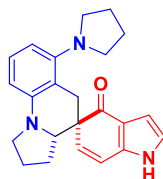

Flash column chromatography on a silica gel (ethyl acetate: petroleum ether, 1:3) afforded the product (19.0 mg, 53% yield, dr >20:1) as a yellow solid.

**<sup>1</sup>H NMR** (500 MHz, CDCl<sub>3</sub>) δ 8.95 (s, 1H), 7.08 (t, *J* = 8.1 Hz, 1H), 6.70 – 6.66 (m, 1H), 6.63 (t, *J* = 2.3 Hz, 1H), 6.44 (d, *J* = 9.9 Hz, 1H), 6.37 (d, *J* = 7.8 Hz, 1H), 6.26 (d, *J* = 8.0 Hz, 1H), 5.64 (d, *J* = 10.0 Hz, 1H), 3.91 (dd, *J* = 9.7, 5.3 Hz, 1H), 3.57 – 3.51 (m, 1H), 3.35 (dd, *J* = 15.9, 8.2 Hz, 2H), 3.19 (d, *J* = 15.6 Hz, 1H), 3.15 – 3.10 (m, 1H), 2.87 – 2.80 (m, 2H), 2.76 (d, *J* = 15.6 Hz, 1H), 1.92 – 1.83 (m, 5H), 1.80 – 1.73 (m, 2H), 1.28 – 1.25 (m, 1H); **<sup>13</sup>C NMR** (126 MHz, CDCl<sub>3</sub>) δ 197.8, 150.1, 143.9, 140.5, 135.9, 127.0, 120.4, 119.6, 116.4, 110.9, 106.1, 104.5, 104.0, 64.2, 51.3, 49.7, 48.1, 36.9, 27.7, 24.6, 23.7. **HRMS (ESI)**: calcd. for C<sub>23</sub>H<sub>26</sub>N<sub>3</sub>O [M+H]<sup>+</sup>: 360.2070, found: 360.2075.

**6a',6b',7',8',9',10',10a',11'-octahydro-5'H-spiro[indole-5,6'-isoindolo[2,1-a]quinolin]-4(1H)-one (3o)**

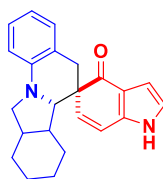

Flash column chromatography on a silica gel (ethyl acetate: petroleum ether, 1:3) afforded the product (19.3 mg, 56% yield, dr >20:1) as a white solid.

**<sup>1</sup>H NMR** (500 MHz, DMSO) δ 11.43 (s, 1H), 6.91 (t, *J* = 7.6 Hz, 1H), 6.82 (d, *J* = 7.1 Hz, 1H), 6.77 (s, 1H), 6.54 (d, *J* = 9.9 Hz, 1H), 6.36 (dd, *J* = 14.6, 7.6 Hz, 2H), 6.29 (s, 1H), 5.41 (d, *J* = 9.9 Hz, 1H), 3.82 (d, *J* = 9.7 Hz, 1H), 3.08 (d, *J* = 9.2 Hz, 1H), 3.02 (d, *J* = 15.2 Hz, 2H), 2.33 (s, 1H), 1.92 (d, *J* = 5.4 Hz, 1H), 1.60 (s, 1H), 1.48 (t, *J* = 14.9 Hz, 2H), 1.13 (d, *J* = 20.9 Hz, 6H); **<sup>13</sup>C NMR** (126 MHz, DMSO) δ 195.9, 143.8, 140.1, 134.6, 128.9, 127.8, 121.8, 119.6, 119.3, 117.4, 115.1, 110.5, 105.5, 64.3, 55.4, 54.1, 47.5, 37.0, 28.6, 26.1, 25.2, 21.6. **HRMS (ESI)**: calcd. for C<sub>23</sub>H<sub>25</sub>N<sub>2</sub>O [M+H]<sup>+</sup>: 345.1961, found: 345.1960.

**2-methyl-6a,7,8,9,10,11-hexahydro-5H-spiro[azepino[1,2-a]quinoline-6,5'-indol]-4'(1'H)-one (3p)**

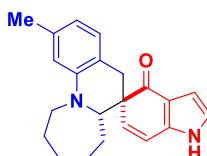

Flash column chromatography on a silica gel (ethyl acetate: petroleum ether, 1:3) afforded the product (23.2 mg, 70% yield, dr 4:1) as a white solid.

**<sup>1</sup>H NMR** (500 MHz, DMSO) δ 11.58 (s, 1H), 6.90 (d, *J* = 6.7 Hz, 1H), 6.83 (d, *J* = 7.5 Hz, 1H), 6.72 (d, *J* = 9.9 Hz, 1H), 6.58 (s, 1H), 6.44 – 6.39 (m, 2H), 5.88 (d, *J* = 9.9 Hz, 1H), 3.49 (dd, *J* = 8.8, 4.7 Hz,



1H), 3.46 – 3.40 (m, 1H), 3.36 (d,  $J = 8.5$  Hz, 1H), 3.22 (d,  $J = 15.8$  Hz, 1H), 2.36 (d,  $J = 15.9$  Hz, 1H), 2.23 (s, 3H), 1.76 (d,  $J = 6.2$  Hz, 1H), 1.71 – 1.63 (m, 1H), 1.62 – 1.49 (m, 4H), 1.31 (dd,  $J = 21.6, 15.0$  Hz, 2H), 1.24 (d,  $J = 9.6$  Hz, 1H);  $^{13}\text{C NMR}$  (126 MHz, DMSO)  $\delta$  196.1, 147.0, 140.3, 136.1, 135.3, 129.2, 121.6, 119.5, 118.3, 118.0, 116.6, 114.9, 105.3, 66.0, 51.7, 50.8, 38.9, 30.6, 29.3, 29.1, 26.4, 21.6. **HRMS (ESI):** calcd. for  $\text{C}_{22}\text{H}_{25}\text{N}_2\text{O}$   $[\text{M}+\text{H}]^+$ : 333.1961, found: 333.1960.

**2-methoxy-6a,7,8,9,10,11-hexahydro-5H-spiro[azepino[1,2-a]quinoline-6,5'-indol]-4'(1'H)-one (3q)**

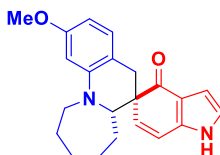

Flash column chromatography on a silica gel (ethyl acetate: petroleum ether, 1:3) afforded the product (20.9 mg, 60% yield, dr 5:1) as a white solid.

$^1\text{H NMR}$  (500 MHz, DMSO)  $\delta$  11.58 (s, 1H), 6.91 (s, 1H), 6.84 (d,  $J = 8.2$  Hz, 1H), 6.72 (d,  $J = 9.9$  Hz, 1H), 6.40 (s, 1H), 6.25 (s, 1H), 6.21 (d,  $J = 8.2$  Hz, 1H), 5.89 (d,  $J = 9.9$  Hz, 1H), 3.71 (s, 3H), 3.55 (dd,  $J = 7.6, 5.1$  Hz, 1H), 3.43 (d,  $J = 7.8$  Hz, 1H), 3.37 (d,  $J = 7.9$  Hz, 1H), 3.17 (d,  $J = 15.6$  Hz, 1H), 2.35 (d,  $J = 15.6$  Hz, 1H), 1.75 (s, 1H), 1.65 (s, 1H), 1.59 – 1.48 (m, 3H), 1.40 – 1.30 (m, 2H), 1.26 – 1.21 (m, 1H);  $^{13}\text{C NMR}$  (126 MHz, DMSO)  $\delta$  196.1, 159.1, 147.8, 140.2, 135.5, 129.8, 121.6, 119.4, 116.6, 113.8, 105.4, 102.7, 99.6, 65.6, 55.2, 51.9, 50.6, 38.7, 30.2, 29.3, 26.4. **HRMS (ESI):** calcd. for  $\text{C}_{22}\text{H}_{25}\text{N}_2\text{O}_2$   $[\text{M}+\text{H}]^+$ : 349.1911, found: 349.1916.

**2-chloro-6a,7,8,9,10,11-hexahydro-5H-spiro[azepino[1,2-a]quinoline-6,5'-indol]-4'(1'H)-one (3r)**

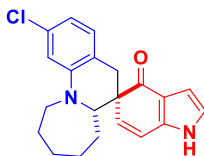

Flash column chromatography on a silica gel (ethyl acetate: petroleum ether, 1:3) afforded the product (23.9 mg, 68% yield, dr 8:1) as a white solid.

$^1\text{H NMR}$  (500 MHz, DMSO)  $\delta$  11.62 (s, 1H), 6.99 – 6.90 (m, 2H), 6.73 (d,  $J = 10.7$  Hz, 2H), 6.58 (d,  $J = 7.7$  Hz, 1H), 6.41 (s, 1H), 5.86 (d,  $J = 9.8$  Hz, 1H), 3.60 (d,  $J = 6.6$  Hz, 1H), 3.48 – 3.36 (m, 2H), 3.16 (d,  $J = 15.9$  Hz, 1H), 2.41 (d,  $J = 16.0$  Hz, 1H), 1.73 (s, 1H), 1.62 (d,  $J = 7.3$  Hz, 2H), 1.51 (d,  $J = 4.4$  Hz, 2H), 1.42 – 1.25 (m, 3H);  $^{13}\text{C NMR}$  (126 MHz, DMSO)  $\delta$  195.7, 147.8, 140.2, 135.1, 131.8, 130.6, 121.7, 120.1, 119.2, 116.9, 116.0, 112.6, 105.5, 65.1, 51.3, 50.3, 38.6, 29.7, 29.3, 29.2, 26.3. **HRMS (ESI):** calcd. for  $\text{C}_{21}\text{H}_{22}\text{ClN}_2\text{O}$   $[\text{M}+\text{H}]^+$ : 353.1415, found: 353.1413.

**2-bromo-6a,7,8,9,10,11-hexahydro-5H-spiro[azepino[1,2-a]quinoline-6,5'-indol]-4'(1'H)-one (3s)**

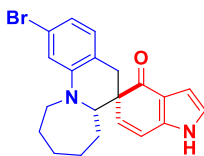

Flash column chromatography on a silica gel (ethyl acetate: petroleum ether, 1:3) afforded the product

(30.9 mg, 78% yield, dr 4:1) as a white solid.

**<sup>1</sup>H NMR** (500 MHz, DMSO)  $\delta$  11.64 (s, 1H), 6.97 – 6.89 (m, 2H), 6.87 (s, 1H), 6.74 (t,  $J$  = 10.0 Hz, 2H), 6.43 (s, 1H), 5.88 (d,  $J$  = 8.5 Hz, 1H), 3.60 (s, 1H), 3.44 (dd,  $J$  = 31.0, 11.2 Hz, 2H), 3.16 (d,  $J$  = 16.2 Hz, 1H), 2.42 (d,  $J$  = 16.0 Hz, 1H), 1.75 (s, 1H), 1.70 – 1.49 (m, 4H), 1.41 – 1.24 (m, 3H); **<sup>13</sup>C NMR** (126 MHz, DMSO)  $\delta$  195.7, 148.1, 140.2, 135.0, 131.0, 121.8, 120.6, 120.3, 119.3, 118.9, 116.9, 115.4, 105.5, 65.1, 51.3, 50.4, 38.6, 29.7, 29.3, 29.2, 26.4. **HRMS (ESI)**: calcd. for C<sub>21</sub>H<sub>22</sub>BrN<sub>2</sub>O [M+H]<sup>+</sup>: 397.0910, found: 397.0911.

### 2-phenyl-1',2',3',3a'-tetrahydro-5'H-spiro[indole-5,4'-pyrrolo[1,2-a]quinolin]-4(1H)-one (3t)

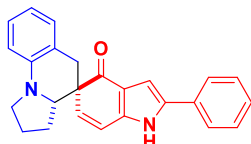

Flash column chromatography on a silica gel (ethyl acetate: petroleum ether, 1:3) afforded the product (26.1 mg, 71% yield, dr >20:1) as a yellow solid.

**<sup>1</sup>H NMR** (500 MHz, DMSO)  $\delta$  12.11 (s, 1H), 7.75 (d,  $J$  = 7.5 Hz, 2H), 7.44 (t,  $J$  = 7.3 Hz, 2H), 7.29 (t,  $J$  = 7.1 Hz, 1H), 7.10 (t,  $J$  = 7.5 Hz, 1H), 7.04 (d,  $J$  = 7.1 Hz, 1H), 6.93 (s, 1H), 6.82 (d,  $J$  = 9.8 Hz, 1H), 6.55 (t,  $J$  = 6.8 Hz, 2H), 5.70 (d,  $J$  = 9.8 Hz, 1H), 3.80 – 3.68 (m, 1H), 3.50 (t,  $J$  = 8.4 Hz, 1H), 3.25 (d,  $J$  = 15.6 Hz, 1H), 3.12 (d,  $J$  = 8.4 Hz, 1H), 2.59 (d,  $J$  = 15.6 Hz, 1H), 1.92 (s, 2H), 1.80 – 1.68 (m, 1H), 1.26 – 1.19 (m, 1H); **<sup>13</sup>C NMR** (126 MHz, DMSO)  $\delta$  200.3, 148.0, 146.3, 139.7, 139.4, 136.6, 134.1, 132.6, 132.2, 129.4, 125.1, 124.5, 122.4, 120.2, 115.6, 107.5, 107.5, 69.5, 53.0, 52.3, 43.9, 32.4, 28.3. **HRMS (ESI)**: calcd. for C<sub>25</sub>H<sub>23</sub>N<sub>2</sub>O [M+H]<sup>+</sup>: 367.1805, found: 367.1808.

### 2-(p-tolyl)-1',2',3',3a'-tetrahydro-5'H-spiro[indole-5,4'-pyrrolo[1,2-a]quinolin]-4(1H)-one (3u)

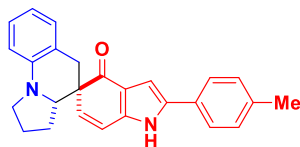

Flash column chromatography on a silica gel (ethyl acetate: petroleum ether, 1:3) afforded the product (19.0 mg, 50% yield, dr >20:1) as a yellow solid.

**<sup>1</sup>H NMR** (500 MHz, DMSO)  $\delta$  12.04 (s, 1H), 7.64 (d,  $J$  = 5.9 Hz, 2H), 7.25 (d,  $J$  = 5.5 Hz, 2H), 7.06 (d,  $J$  = 33.2 Hz, 2H), 6.86 (s, 1H), 6.80 (d,  $J$  = 9.4 Hz, 1H), 6.55 (s, 2H), 5.68 (d,  $J$  = 9.3 Hz, 1H), 3.72 (s, 1H), 3.50 (s, 1H), 3.25 (d,  $J$  = 15.4 Hz, 1H), 3.11 (d,  $J$  = 7.2 Hz, 1H), 2.58 (d,  $J$  = 15.7 Hz, 1H), 2.34 (s, 3H), 1.91 (s, 2H), 1.72 (s, 1H), 1.32 – 1.11 (m, 1H); **<sup>13</sup>C NMR** (126 MHz, DMSO)  $\delta$  200.3, 148.0, 146.1, 141.5, 139.6, 139.5, 134.7, 134.1, 133.9, 132.6, 129.4, 125.1, 124.5, 122.4, 120.2, 115.7, 106.9, 106.8, 69.5, 52.9, 52.3, 32.4, 28.3, 26.0. **HRMS (ESI)**: calcd. for C<sub>26</sub>H<sub>24</sub>N<sub>2</sub>O [M+H]<sup>+</sup>: 381.1961, found: 381.1966.

### 2-(4-fluorophenyl)-1',2',3',3a'-tetrahydro-5'H-spiro[indole-5,4'-pyrrolo[1,2-a]quinolin]-4(1H)-one (3v)

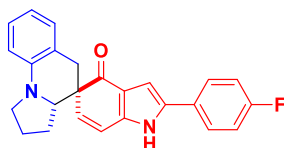

Flash column chromatography on a silica gel (ethyl acetate: petroleum ether, 1:3) afforded the product (25.0 mg, 65% yield, dr 5:1) as a yellow solid.

**<sup>1</sup>H NMR** (500 MHz, DMSO)  $\delta$  12.08 (s, 1H), 7.77 (dd,  $J$  = 8.6, 5.4 Hz, 2H), 7.27 (t,  $J$  = 8.8 Hz, 2H), 7.08 (t,  $J$  = 7.5 Hz, 1H), 7.02 (d,  $J$  = 7.4 Hz, 1H), 6.89 (s, 1H), 6.78 (d,  $J$  = 9.9 Hz, 1H), 6.53 (t,  $J$  = 7.5 Hz, 2H), 5.68 (d,  $J$  = 9.9 Hz, 1H), 3.71 (dd,  $J$  = 9.7, 5.8 Hz, 1H), 3.49 (t,  $J$  = 8.1 Hz, 1H), 3.22 (d,  $J$  = 15.5 Hz, 1H), 3.10 (d,  $J$  = 7.4 Hz, 1H), 2.56 (d,  $J$  = 15.7 Hz, 1H), 1.88 (d,  $J$  = 22.9 Hz, 2H), 1.76 – 1.67 (m, 1H), 1.23 (m, 1H); **<sup>13</sup>C NMR** (126 MHz, DMSO)  $\delta$  195.5, 161.7 (d,  $J$  = 244.4 Hz), 143.2, 141.5, 135.0, 133.7, 129.3, 127.8, 126.7 (t,  $J$  = 7.6 Hz), 120.3, 119.7, 117.6, 116.3, 116.2, 115.4, 110.9, 102.7, 64.7, 48.2, 47.5, 39.1, 27.6, 23.5. **HRMS (ESI)**: calcd. for C<sub>25</sub>H<sub>22</sub>FN<sub>2</sub>O [M+H]<sup>+</sup>: 385.1711, found: 385.1710.

### 1',2',3',3a'-tetrahydro-5'H-spiro[carbazole-3,4'-pyrrolo[1,2-a]quinolin]-4(9H)-one (5a)

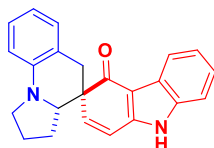

Flash column chromatography on a silica gel (ethyl acetate: petroleum ether, 1:6) afforded the product (24.8 mg, 73% yield, dr >20:1) as a yellow solid.

**<sup>1</sup>H NMR** (500 MHz, DMSO)  $\delta$  12.13 (s, 1H), 8.04 (d,  $J$  = 7.0 Hz, 1H), 7.49 (d,  $J$  = 7.3 Hz, 1H), 7.32 – 7.17 (m, 2H), 7.09 (t,  $J$  = 7.5 Hz, 1H), 7.03 (d,  $J$  = 7.0 Hz, 1H), 6.93 (d,  $J$  = 9.9 Hz, 1H), 6.55 (t,  $J$  = 8.8 Hz, 2H), 5.99 (d,  $J$  = 9.9 Hz, 1H), 3.79 (dd,  $J$  = 9.2, 6.0 Hz, 1H), 3.49 (t,  $J$  = 7.7 Hz, 1H), 3.31 (s, 1H), 3.12 (d,  $J$  = 8.2 Hz, 1H), 2.61 (d,  $J$  = 15.8 Hz, 1H), 1.97 – 1.78 (m, 2H), 1.78 – 1.63 (m, 1H), 1.19 (d,  $J$  = 10.2 Hz, 1H); **<sup>13</sup>C NMR** (126 MHz, DMSO)  $\delta$  194.9, 146.9, 143.2, 140.5, 137.3, 129.3, 127.9, 124.5, 124.0, 123.0, 120.9, 119.6, 118.1, 115.5, 112.7, 111.0, 110.7, 64.7, 48.7, 47.5, 40.5, 40.4, 40.3, 40.3, 40.2, 40.1, 39.9, 39.8, 39.7, 39.5, 39.1, 27.7, 23.5. **HRMS (ESI)**: calcd. for C<sub>23</sub>H<sub>21</sub>N<sub>2</sub>O [M+H]<sup>+</sup>: 341.1648, found: 341.1653.

### 8'-methyl-1',2',3',3a'-tetrahydro-5'H-spiro[carbazole-3,4'-pyrrolo[1,2-a]quinolin]-4(9H)-one (5b)

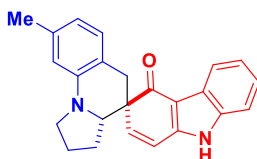

Flash column chromatography on a silica gel (ethyl acetate: petroleum ether, 1:3) afforded the product (21.3 mg, 60% yield, dr 3:1) as a light yellow solid.

**<sup>1</sup>H NMR** (500 MHz, DMSO)  $\delta$  12.12 (s, 1H), 8.04 (d,  $J$  = 6.8 Hz, 1H), 7.50 (d,  $J$  = 8.2 Hz, 1H), 7.30 – 7.19 (m, 2H), 6.96 – 6.90 (m, 2H), 6.38 (d,  $J$  = 9.5 Hz, 2H), 6.00 (d,  $J$  = 9.9 Hz, 1H), 3.78 (dd,  $J$  = 9.6, 5.9 Hz, 1H), 3.49 (t,  $J$  = 7.7 Hz, 1H), 3.28 (d,  $J$  = 15.6 Hz, 1H), 3.12 (dd,  $J$  = 16.7, 8.8 Hz, 1H), 2.58 (d,  $J$  = 15.6 Hz, 1H), 2.25 (s, 3H), 1.87 (dd,  $J$  = 19.3, 8.3 Hz, 2H), 1.77 – 1.68 (m, 1H), 1.21 (dd,  $J$  = 21.2, 11.8 Hz, 1H); **<sup>13</sup>C NMR** (126 MHz, DMSO)  $\delta$  195.0, 146.9, 143.1, 140.7, 137.3, 136.7, 129.2, 124.5, 124.0, 122.9, 120.9, 118.0, 116.8, 116.4, 112.7, 111.6, 110.7, 64.7, 49.0, 47.5, 38.8, 27.7, 23.5, 21.8. **HRMS (ESI)**: calcd. for C<sub>24</sub>H<sub>23</sub>N<sub>2</sub>O [M+H]<sup>+</sup>: 355.1805, found: 355.1808.

### 8'-(trifluoromethyl)-1',2',3',3a'-tetrahydro-5'H-spiro[carbazole-3,4'-pyrrolo[1,2-a]quinolin]-

#### 4(9H)-one (5c)

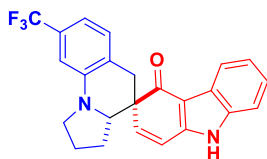

Flash column chromatography on a silica gel (ethyl acetate: petroleum ether, 1:3) afforded the product (33.5 mg, 82% yield, dr >20:1) as a yellow solid.

**<sup>1</sup>H NMR** (500 MHz, DMSO)  $\delta$  12.17 (s, 1H), 8.10 – 7.97 (m, 1H), 7.51 (d,  $J$  = 7.2 Hz, 1H), 7.32 – 7.19 (m, 3H), 6.95 (d,  $J$  = 9.9 Hz, 1H), 6.84 (d,  $J$  = 7.7 Hz, 1H), 6.76 (s, 1H), 5.96 (d,  $J$  = 9.9 Hz, 1H), 3.84 (dd,  $J$  = 9.9, 5.8 Hz, 1H), 3.58 (t,  $J$  = 7.9 Hz, 1H), 3.33 (s, 1H), 3.17 (dd,  $J$  = 17.0, 8.9 Hz, 1H), 2.73 (d,  $J$  = 16.2 Hz, 1H), 1.97 – 1.86 (m, 2H), 1.75 (dt,  $J$  = 10.0, 5.6 Hz, 1H), 1.27 – 1.17 (m, 1H).; **<sup>13</sup>C NMR** (126 MHz, DMSO)  $\delta$  194.4, 147.0, 143.5, 139.8, 137.3, 130.0, 127.4 (d,  $J$  = 302.4 Hz), 124.5, 124.2, 124.1, 123.1, 120.9, 118.5, 112.8, 111.3 (q,  $J$  = 3.8 Hz), 110.7, 106.4 (d,  $J$  = 3.8 Hz), 64.7, 47.9, 47.5, 38.8, 27.6, 23.5. **HRMS (ESI)**: calcd. for C<sub>24</sub>H<sub>20</sub>F<sub>3</sub>N<sub>2</sub>O [M+H]<sup>+</sup>: 409.1522, found: 409.1526.

#### 7'-chloro-1',2',3',3a'-tetrahydro-5'H-spiro[carbazole-3,4'-pyrrolo[1,2-a]quinolin]-4(9H)-one (5d)

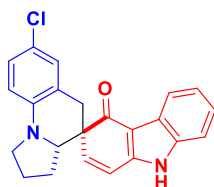

Flash column chromatography on a silica gel (ethyl acetate: petroleum ether, 1:3) afforded the product (18.7 mg, 50% yield, dr 1.4:1) as a yellow solid.

**<sup>1</sup>H NMR** (500 MHz, DMSO)  $\delta$  12.16 (s, 1H), 8.04 (d,  $J$  = 7.4 Hz, 1H), 7.50 (d,  $J$  = 7.7 Hz, 1H), 7.31 – 7.21 (m, 2H), 7.12 (s, 2H), 6.95 (d,  $J$  = 9.9 Hz, 1H), 6.60 – 6.53 (m, 1H), 5.96 (d,  $J$  = 9.9 Hz, 1H), 3.79 (dd,  $J$  = 9.6, 5.9 Hz, 1H), 3.50 (t,  $J$  = 8.1 Hz, 1H), 3.29 (d,  $J$  = 16.0 Hz, 1H), 3.12 (dd,  $J$  = 16.9, 8.7 Hz, 1H), 2.66 (d,  $J$  = 16.0 Hz, 1H), 1.90 (dd,  $J$  = 16.7, 9.0 Hz, 2H), 1.74 (dd,  $J$  = 11.7, 5.8 Hz, 1H), 1.23 – 1.16 (m, 1H).; **<sup>13</sup>C NMR** (126 MHz, DMSO)  $\delta$  194.5, 146.9, 142.1, 140.0, 137.3, 128.8, 127.4, 124.5, 124.1, 123.1, 121.7, 120.9, 118.8, 118.4, 112.8, 112.2, 110.7, 64.7, 48.2, 47.7, 38.7, 27.6, 23.5. **HRMS (ESI)**: calcd. for C<sub>23</sub>H<sub>20</sub>ClN<sub>2</sub>O [M+H]<sup>+</sup>: 375.1259, found: 375.1265.

#### 6'-methoxy-1',2',3',3a'-tetrahydro-5'H-spiro[carbazole-3,4'-pyrrolo[1,2-a]quinolin]-4(9H)-one (5e)

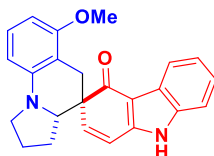

Flash column chromatography on a silica gel (ethyl acetate: petroleum ether, 1:3) afforded the product (20.7 mg, 56% yield, dr 14:1) as a yellow solid.

**<sup>1</sup>H NMR** (500 MHz, DMSO)  $\delta$  12.09 (s, 1H), 8.11 (d,  $J$  = 7.6 Hz, 1H), 7.52 (d,  $J$  = 7.9 Hz, 1H), 7.25 (dt,  $J$  = 23.9, 7.2 Hz, 2H), 7.11 (t,  $J$  = 8.1 Hz, 1H), 6.40 (d,  $J$  = 10.3 Hz, 1H), 6.38 – 6.26 (m, 3H), 4.13 – 4.05 (m, 1H), 3.70 (d,  $J$  = 13.0 Hz, 3H), 3.50 (t,  $J$  = 7.5 Hz, 1H), 3.33 – 3.21 (m, 2H), 2.93 (d,  $J$  = 16.4 Hz, 1H), 1.85 (dd,  $J$  = 19.2, 8.6 Hz, 2H), 1.58 – 1.49 (m, 1H), 1.22 (dd,  $J$  = 20.0, 9.8 Hz, 1H); **<sup>13</sup>C NMR**

(126 MHz, DMSO)  $\delta$  182.0, 157.7, 153.7, 144.3, 143.5, 137.1, 132.1, 128.4, 124.3, 123.6, 122.1, 121.0, 112.3, 112.1, 106.3, 105.2, 99.3, 63.5, 55.7, 48.0, 39.0, 34.1, 27.8, 23.3. **HRMS (ESI):** calcd. for  $C_{24}H_{23}N_2O_2$   $[M+H]^+$ : 371.1754, found: 371.1750.

**6'-fluoro-1',2',3',3a'-tetrahydro-5'H-spiro[carbazole-3,4'-pyrrolo[1,2-a]quinolin]-4(9H)-one (5f)**

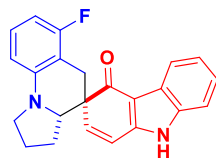

Flash column chromatography on a silica gel (ethyl acetate: petroleum ether, 1:3) afforded the product (24.0 mg, 67% yield, dr 4:1) as a yellow solid.

**$^1H$  NMR** (500 MHz, DMSO)  $\delta$  12.18 (s, 1H), 8.05 (d,  $J = 6.9$  Hz, 1H), 7.51 (d,  $J = 7.4$  Hz, 1H), 7.31 – 7.23 (m, 2H), 7.12 (dd,  $J = 15.3, 7.9$  Hz, 1H), 6.97 (d,  $J = 9.9$  Hz, 1H), 6.41 (dd,  $J = 15.8, 8.2$  Hz, 2H), 5.98 (d,  $J = 9.9$  Hz, 1H), 3.76 (dd,  $J = 9.6, 5.9$  Hz, 1H), 3.52 (t,  $J = 7.6$  Hz, 1H), 3.16 (dd,  $J = 16.8, 8.8$  Hz, 1H), 3.08 (d,  $J = 16.2$  Hz, 1H), 2.75 (d,  $J = 16.0$  Hz, 1H), 1.94 – 1.83 (m, 2H), 1.75 (dd,  $J = 11.1, 5.5$  Hz, 1H), 1.23 (dd,  $J = 19.8, 10.1$  Hz, 1H);  **$^{13}C$  NMR** (126 MHz, DMSO)  $\delta$  194.5, 161.3 (d,  $J = 239.4$  Hz), 147.0, 144.8 (d,  $J = 5.0$  Hz), 139.8, 137.3, 128.5 (d,  $J = 11.3$  Hz), 124.5, 124.1, 123.1, 121.0, 118.5, 112.8, 110.7, 107.2, 106.2 (d,  $J = 20.1$  Hz), 102.0 (d,  $J = 22.4$  Hz), 64.2, 47.8, 47.8, 31.4, 27.6, 23.4. **HRMS (ESI):** calcd. for  $C_{23}H_{20}FN_2O$   $[M+H]^+$ : 359.1554, found: 359.1558.

**6'-bromo-1',2',3',3a'-tetrahydro-5'H-spiro[carbazole-3,4'-pyrrolo[1,2-a]quinolin]-4(9H)-one (5g)**

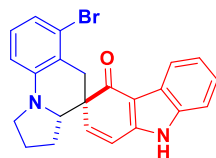

Flash column chromatography on a silica gel (ethyl acetate: petroleum ether, 1:3) afforded the product (27.2 mg, 65% yield, dr 1:1) as a yellow solid.

**$^1H$  NMR** (500 MHz, DMSO)  $\delta$  12.20 (s, 1H), 8.05 (d,  $J = 6.8$  Hz, 1H), 7.51 (d,  $J = 7.2$  Hz, 1H), 7.35 – 7.21 (m, 2H), 7.05 (t,  $J = 7.9$  Hz, 1H), 6.98 (d,  $J = 9.8$  Hz, 1H), 6.85 (d,  $J = 7.7$  Hz, 1H), 6.61 (d,  $J = 8.0$  Hz, 1H), 6.00 (d,  $J = 9.8$  Hz, 1H), 3.81 – 3.73 (m, 1H), 3.50 (d,  $J = 7.2$  Hz, 1H), 3.17 (t,  $J = 13.5$  Hz, 2H), 2.81 (d,  $J = 16.4$  Hz, 1H), 1.99 – 1.84 (m, 2H), 1.80 – 1.71 (m, 1H), 1.29 – 1.18 (m, 1H);  **$^{13}C$  NMR** (126 MHz, DMSO)  $\delta$  194.2, 147.0, 144.8, 139.9, 137.3, 129.1, 125.1, 124.5, 124.1, 123.1, 120.9, 119.1, 118.6, 112.8, 110.7, 110.6, 64.2, 55.4, 48.8, 47.7, 27.6, 23.6. **HRMS (ESI):** calcd. for  $C_{23}H_{20}BrN_2O$   $[M+H]^+$ : 419.0754, found: 419.0759.

**4-fluoro-6a,7,8,9,10,11-hexahydro-5H-spiro[azepino[1,2-a]quinoline-6,3'-carbazol]-4'(9'H)-one (5h)**

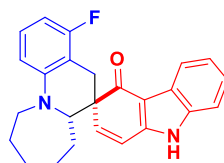

Flash column chromatography on a silica gel (ethyl acetate: petroleum ether, 1:3) afforded the product

(32.8 mg, 85% yield, dr 3.3:1) as a yellow solid.

**<sup>1</sup>H NMR** (500 MHz, DMSO)  $\delta$  12.16 (s, 1H), 8.10 – 8.02 (m, 1H), 7.51 (d,  $J$  = 7.4 Hz, 1H), 7.31 – 7.21 (m, 2H), 7.15 – 7.07 (m, 1H), 6.97 (d,  $J$  = 9.9 Hz, 1H), 6.67 (d,  $J$  = 8.4 Hz, 1H), 6.49 (t,  $J$  = 8.8 Hz, 1H), 6.24 (d,  $J$  = 9.9 Hz, 1H), 3.53 (t,  $J$  = 10.3 Hz, 2H), 3.39 (dd,  $J$  = 16.7, 9.1 Hz, 1H), 3.22 (d,  $J$  = 16.7 Hz, 1H), 2.60 (d,  $J$  = 16.4 Hz, 1H), 1.85 – 1.76 (m, 1H), 1.70 (d,  $J$  = 5.4 Hz, 1H), 1.63 – 1.50 (m, 3H), 1.31 (dd,  $J$  = 14.3, 7.4 Hz, 3H); **<sup>13</sup>C NMR** (126 MHz, DMSO)  $\delta$  195.2, 161.3 (d,  $J$  = 240.6 Hz), 148.9 (d,  $J$  = 7.2 Hz), 147.0, 140.8, 137.3, 127.8 (d,  $J$  = 10.1 Hz), 124.4, 124.0, 123.0, 120.9, 117.4, 112.8, 111.2, 110.5, 108.4 (d,  $J$  = 19.5 Hz), 103.3 (d,  $J$  = 22.0 Hz), 66.2, 50.9, 50.7, 31.7, 30.5, 29.0, 28.5, 26.7. **HRMS (ESI)**: calcd. for C<sub>25</sub>H<sub>24</sub>FN<sub>2</sub>O [M+H]<sup>+</sup>: 387.1867, found: 387.1871.

#### 4-chloro-6a,7,8,9,10,11-hexahydro-5H-spiro[azepino[1,2-a]quinoline-6,3'-carbazol]-4'(9'H)-one (5i)

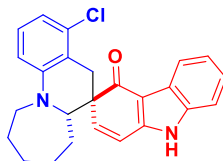

Flash column chromatography on a silica gel (ethyl acetate: petroleum ether, 1:3) afforded the product (31.4 mg, 78% yield, dr 3.3:1) as a yellow solid.

**<sup>1</sup>H NMR** (500 MHz, DMSO)  $\delta$  12.18 (s, 1H), 8.14 – 8.00 (m, 1H), 7.51 (d,  $J$  = 7.2 Hz, 1H), 7.30 – 7.22 (m, 2H), 7.12 (t,  $J$  = 8.1 Hz, 1H), 6.98 (d,  $J$  = 9.9 Hz, 1H), 6.83 (d,  $J$  = 8.4 Hz, 1H), 6.79 (d,  $J$  = 7.8 Hz, 1H), 6.24 (d,  $J$  = 9.9 Hz, 1H), 3.53 (dd,  $J$  = 15.3, 6.4 Hz, 1H), 3.47 (dd,  $J$  = 9.4, 4.7 Hz, 1H), 3.39 (dd,  $J$  = 20.1, 10.8 Hz, 2H), 3.26 (d,  $J$  = 17.0 Hz, 1H), 2.66 (d,  $J$  = 17.0 Hz, 1H), 1.85 – 1.78 (m, 1H), 1.74 – 1.67 (m, 1H), 1.64 – 1.57 (m, 2H), 1.57 – 1.50 (m, 1H), 1.34 – 1.25 (m, 3H); **<sup>13</sup>C NMR** (126 MHz, DMSO)  $\delta$  195.0, 146.9, 140.8, 137.3, 128.0, 124.0, 123.0, 120.9, 117.7, 117.4, 113.7, 112.7, 66.0, 51.9, 50.8, 36.7, 30.5, 28.9, 28.4, 26.6. **HRMS (ESI)**: calcd. for C<sub>25</sub>H<sub>24</sub>ClN<sub>2</sub>O [M+H]<sup>+</sup>: 403.1572, found: 403.1571.

#### 1',2',3',3a'-tetrahydro-5'H-spiro[indole-3,4'-pyrrolo[1,2-a]quinolin]-4-ol (7a)

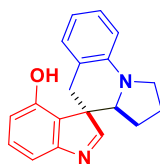

Flash column chromatography on a silica gel (ethyl acetate: petroleum ether, 1:3) afforded the product (18.6 mg, 64% yield, dr >20:1) as a yellow solid.

**<sup>1</sup>H NMR** (500 MHz, DMSO)  $\delta$  9.72 (s, 1H), 7.77 (s, 1H), 7.19 (t,  $J$  = 7.6 Hz, 1H), 7.14 – 7.04 (m, 2H), 7.02 (d,  $J$  = 7.0 Hz, 1H), 6.75 (d,  $J$  = 8.0 Hz, 1H), 6.57 (d,  $J$  = 6.8 Hz, 2H), 4.45 – 4.31 (m, 1H), 3.86 (d,  $J$  = 16.2 Hz, 1H), 3.42 (s, 1H), 3.27 (q,  $J$  = 7.9 Hz, 1H), 2.45 (d,  $J$  = 16.2 Hz, 1H), 1.86 (s, 2H), 1.54 (d,  $J$  = 5.7 Hz, 1H), 0.92 – 0.80 (m, 1H); **<sup>13</sup>C NMR** (126 MHz, DMSO)  $\delta$  175.4, 157.2, 154.1, 144.2, 129.5, 128.7, 127.9, 125.1, 119.7, 115.8, 114.4, 112.7, 111.4, 59.4, 58.0, 47.5, 32.4, 27.7, 23.2. **HRMS (ESI)**: calcd. for C<sub>19</sub>H<sub>19</sub>N<sub>2</sub>O [M+H]<sup>+</sup>: 291.1492, found: 291.1491.

#### 7'-chloro-1',2',3',3a'-tetrahydro-5'H-spiro[indole-3,4'-pyrrolo[1,2-a]quinolin]-4-ol (7b)

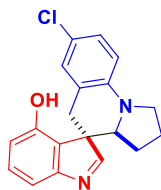

Flash column chromatography on a silica gel (ethyl acetate: petroleum ether, 1:3) afforded the product (26.2 mg, 81% yield, dr >20:1) as a yellow solid.

**<sup>1</sup>H NMR** (500 MHz, DMSO) δ 9.75 (s, 1H), 7.76 (s, 1H), 7.19 (t, *J* = 7.8 Hz, 1H), 7.16 – 7.02 (m, 3H), 6.75 (d, *J* = 8.1 Hz, 1H), 6.55 (d, *J* = 8.6 Hz, 1H), 4.37 (dd, *J* = 9.6, 6.1 Hz, 1H), 3.81 (d, *J* = 16.4 Hz, 1H), 3.42 (d, *J* = 10.4 Hz, 1H), 3.24 (q, *J* = 8.3 Hz, 1H), 2.48 (d, *J* = 16.6 Hz, 1H), 1.86 (d, *J* = 5.1 Hz, 2H), 1.58 – 1.49 (m, 1H), 0.91 – 0.80 (m, 1H); **<sup>13</sup>C NMR** (126 MHz, DMSO) δ 175.0, 157.3, 154.1, 143.1, 129.7, 128.2, 127.5, 124.8, 121.7, 119.1, 114.5, 112.7, 112.6, 59.4, 57.6, 47.7, 32.1, 27.8, 23.3. **HRMS (ESI)**: calcd. for C<sub>19</sub>H<sub>18</sub>ClN<sub>2</sub>O [M+H]<sup>+</sup>: 325.1102, found: 325.1113.

#### 7'-bromo-1',2',3',3a'-tetrahydro-5'H-spiro[indole-3,4'-pyrrolo[1,2-a]quinolin]-4-ol (7c)

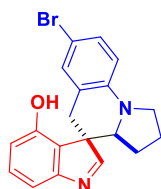

Flash column chromatography on a silica gel (ethyl acetate: petroleum ether, 1:3) afforded the product (22.8 mg, 62% yield, dr >20:1) as a yellow solid.

**<sup>1</sup>H NMR** (500 MHz, DMSO) δ 9.75 (s, 1H), 7.76 (s, 1H), 7.26 – 7.17 (m, 3H), 7.06 (d, *J* = 7.5 Hz, 1H), 6.75 (d, *J* = 8.1 Hz, 1H), 6.51 (d, *J* = 8.6 Hz, 1H), 4.36 (dd, *J* = 9.8, 6.0 Hz, 1H), 3.81 (d, *J* = 16.4 Hz, 1H), 3.42 (td, *J* = 9.0, 3.5 Hz, 1H), 3.23 (q, *J* = 8.5 Hz, 1H), 2.48 (d, *J* = 16.8 Hz, 1H), 1.91 – 1.82 (m, 2H), 1.57 – 1.47 (m, 1H), 0.91 – 0.81 (m, 1H); **<sup>13</sup>C NMR** (126 MHz, DMSO) δ 174.5, 156.8, 153.6, 142.9, 130.4, 129.9, 129.2, 124.3, 121.7, 114.0, 112.6, 112.3, 106.1, 58.9, 57.0, 47.2, 31.6, 27.3, 22.8. **HRMS (ESI)**: calcd. for C<sub>19</sub>H<sub>18</sub>BrN<sub>2</sub>O [M+H]<sup>+</sup>: 369.0597, found: 369.0605.

#### 6'-fluoro-1',2',3',3a'-tetrahydro-5'H-spiro[indole-3,4'-pyrrolo[1,2-a]quinolin]-4-ol (7d)

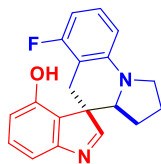

Flash column chromatography on a silica gel (ethyl acetate: petroleum ether, 1:3) afforded the product (23.4 mg, 76% yield, dr >20:1) as a yellow solid.

**<sup>1</sup>H NMR** (500 MHz, DMSO) δ 9.78 (s, 1H), 7.80 (s, 1H), 7.21 (t, *J* = 7.8 Hz, 1H), 7.16 – 7.09 (m, 1H), 7.07 (d, *J* = 7.5 Hz, 1H), 6.76 (d, *J* = 8.1 Hz, 1H), 6.42 (t, *J* = 8.5 Hz, 2H), 4.33 (dd, *J* = 9.3, 6.3 Hz, 1H), 3.61 (d, *J* = 16.7 Hz, 1H), 3.43 (d, *J* = 8.0 Hz, 1H), 3.32 – 3.25 (m, 1H), 2.55 (s, 1H), 1.86 (s, 2H), 1.59 – 1.50 (m, 1H), 0.87 (t, *J* = 9.5 Hz, 1H); **<sup>13</sup>C NMR** (126 MHz, DMSO) δ 174.9, 160.9 (d, *J* = 240.7 Hz), 159.9, 157.3, 154.2, 145.9, 145.8 (d, *J* = 8.8 Hz), 129.8, 128.7 (d, *J* = 11.3 Hz), 124.7, 114.5, 112.8, 107.5, 106.3 (d, *J* = 20.3 Hz), 102.3 (d, *J* = 22.2 Hz), 58.9, 57.2, 47.8, 27.7, 25.1, 23.2. **HRMS (ESI)**: calcd. for C<sub>19</sub>H<sub>18</sub>FN<sub>2</sub>O [M+H]<sup>+</sup>: 309.1403, found: 309.1408.

**6'-chloro-1',2',3',3a'-tetrahydro-5'H-spiro[indole-3,4'-pyrrolo[1,2-a]quinolin]-4-ol (7e)**

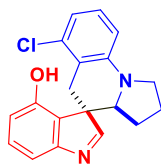

Flash column chromatography on a silica gel (ethyl acetate: petroleum ether, 1:3) afforded the product (24.6 mg, 76% yield, dr >20:1) as a yellow solid.

**<sup>1</sup>H NMR** (500 MHz, DMSO)  $\delta$  9.81 (s, 1H), 7.82 (s, 1H), 7.21 (t,  $J = 7.9$  Hz, 1H), 7.10 (dd,  $J = 17.9, 7.9$  Hz, 2H), 6.78 (d,  $J = 8.1$  Hz, 1H), 6.68 (d,  $J = 7.8$  Hz, 1H), 6.55 (d,  $J = 8.2$  Hz, 1H), 4.33 (dd,  $J = 9.6, 6.2$  Hz, 1H), 3.67 (d,  $J = 17.0$  Hz, 1H), 3.40 (dt,  $J = 10.5, 7.2$  Hz, 1H), 3.31 (dd,  $J = 16.8, 8.2$  Hz, 1H), 2.60 (d,  $J = 17.0$  Hz, 1H), 1.93 – 1.76 (m, 2H), 1.62 – 1.49 (m, 1H), 0.93 – 0.79 (m, 1H); **<sup>13</sup>C NMR** (126 MHz, DMSO)  $\delta$  175.0, 157.3, 154.2, 145.7, 133.4, 129.9, 128.8, 124.6, 117.1, 116.2, 114.6, 112.8, 110.4, 58.8, 57.9, 47.7, 30.2, 27.7, 23.3. **HRMS (ESI)**: calcd. for C<sub>19</sub>H<sub>18</sub>ClN<sub>2</sub>O [M+H]<sup>+</sup>: 325.1108, found: 325.1110.

**6'-bromo-1',2',3',3a'-tetrahydro-5'H-spiro[indole-3,4'-pyrrolo[1,2-a]quinolin]-4-ol (7f)**

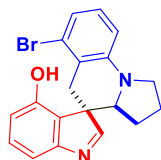

Flash column chromatography on a silica gel (ethyl acetate: petroleum ether, 1:3) afforded the product (28.7 mg, 78% yield, dr >20:1) as a yellow solid.

**<sup>1</sup>H NMR** (500 MHz, DMSO)  $\delta$  9.81 (s, 1H), 7.83 (s, 1H), 7.22 (t,  $J = 7.9$  Hz, 1H), 7.11 – 7.01 (m, 2H), 6.85 (d,  $J = 7.8$  Hz, 1H), 6.77 (d,  $J = 8.1$  Hz, 1H), 6.60 (d,  $J = 8.2$  Hz, 1H), 4.33 (dd,  $J = 9.5, 6.3$  Hz, 1H), 3.65 (d,  $J = 16.9$  Hz, 1H), 3.42 (dd,  $J = 11.9, 8.7$  Hz, 1H), 3.34 – 3.28 (m, 1H), 2.55 (d,  $J = 16.9$  Hz, 1H), 1.92 – 1.83 (m, 2H), 1.57 (dd,  $J = 10.6, 5.2$  Hz, 1H), 0.92 – 0.82 (m, 1H); **<sup>13</sup>C NMR** (126 MHz, DMSO)  $\delta$  174.8, 157.1, 154.0, 145.7, 129.7, 129.1, 124.4, 124.3, 119.1, 118.4, 114.4, 112.6, 110.8, 58.7, 58.0, 47.5, 33.0, 27.5, 23.2. **HRMS (ESI)**: calcd. for C<sub>19</sub>H<sub>18</sub>BrN<sub>2</sub>O [M+H]<sup>+</sup>: 369.0602, found: 369.0600.

**3-bromo-6a,7,8,9,10,11-hexahydro-5H-spiro[azepino[1,2-a]quinoline-6,3'-indol]-4'-ol (7g)**

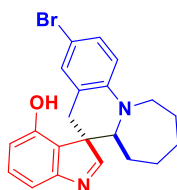

Flash column chromatography on a silica gel (ethyl acetate: petroleum ether, 1:3) afforded the product (30.0 mg, 76% yield, dr 1.5:1) as a yellow solid.

**<sup>1</sup>H NMR** (500 MHz, DMSO)  $\delta$  9.75 (s, 1H), 7.92 (s, 1H), 7.24 – 7.15 (m, 2H), 7.11 (d,  $J = 2.2$  Hz, 1H), 7.05 (d,  $J = 7.4$  Hz, 1H), 6.71 (dd,  $J = 14.1, 8.5$  Hz, 2H), 4.37 – 4.28 (m, 2H), 3.76 (d,  $J = 16.3$  Hz, 1H), 3.40 (t,  $J = 4.8$  Hz, 1H), 2.35 (d,  $J = 16.4$  Hz, 1H), 1.72 (dd,  $J = 12.1, 6.1$  Hz, 1H), 1.69 – 1.61 (m, 1H), 1.41 (ddd,  $J = 24.7, 13.6, 5.4$  Hz, 4H), 1.31 (d,  $J = 8.6$  Hz, 1H), 0.94 (dd,  $J = 9.2, 4.6$  Hz, 1H); **<sup>13</sup>C NMR** (126 MHz, DMSO)  $\delta$  174.9, 156.7, 153.3, 145.9, 130.3, 129.8, 129.2, 125.2, 122.8, 114.3, 113.9, 112.2, 106.8, 60.5, 59.6, 49.3, 31.6, 29.2, 29.1, 28.8, 25.7. **HRMS (ESI)**: calcd. for C<sub>21</sub>H<sub>22</sub>BrN<sub>2</sub>O [M+H]<sup>+</sup>: 396.0835, found: 396.0837.



## Reference

1. Jurberg, I. D.; Peng, B.; Wçstefeld, E.; Wasserloos, M.; Maulide, N. *Angew. Chem. Int. Ed.* **2012**, *51*, 1950.
2. Huang, J.-R.; Qin, L.; Zhu, Y.-Q.; Song, Q.; Dong, L. *Chem. Commun.* **2015**, *51*, 2844.

## 4. Crystal Structure and Data

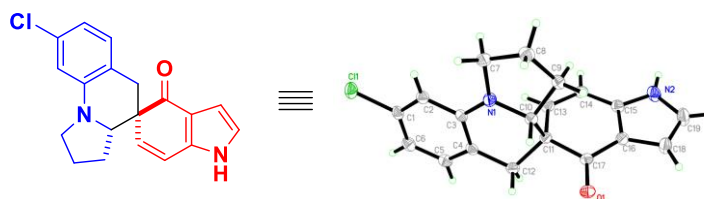

**3d (CCDC 1828278)**

Table 1. Crystal data and structure refinement for **3d**.

|                                   |                                                                                                                        |
|-----------------------------------|------------------------------------------------------------------------------------------------------------------------|
| Identification code               | <b>3d</b>                                                                                                              |
| Empirical formula                 | C <sub>19</sub> H <sub>17</sub> ClN <sub>2</sub> O                                                                     |
| Formula weight                    | 324.80                                                                                                                 |
| Temperature                       | 293(2) K                                                                                                               |
| Wavelength                        | 1.54184 Å                                                                                                              |
| Crystal system, space group       | Monoclinic, P21/c                                                                                                      |
| Unit cell dimensions              | a = 7.5569(2) Å    alpha = 90 deg.<br>b = 17.7897(4) Å    beta = 95.909(3) deg.<br>c = 11.2378(3) Å    gamma = 90 deg. |
| Volume                            | 1502.73(7) Å <sup>3</sup>                                                                                              |
| Z, Calculated density             | 4, 1.436 Mg/m <sup>3</sup>                                                                                             |
| Absorption coefficient            | 2.292 mm <sup>-1</sup>                                                                                                 |
| F(000)                            | 680                                                                                                                    |
| Crystal size                      | 0.09 x 0.08 x 0.08 mm                                                                                                  |
| Theta range for data collection   | 4.67 to 67.25 deg.                                                                                                     |
| Limiting indices                  | -8 ≤ h ≤ 9, -13 ≤ k ≤ 21, -13 ≤ l ≤ 13                                                                                 |
| Reflections collected / unique    | 9001 / 2685 [R(int) = 0.0314]                                                                                          |
| Completeness to theta = 67.25     | 100.0 %                                                                                                                |
| Max. and min. transmission        | 0.8379 and 0.8203                                                                                                      |
| Refinement method                 | Full-matrix least-squares on F <sup>2</sup>                                                                            |
| Data / restraints / parameters    | 2685 / 0 / 208                                                                                                         |
| Goodness-of-fit on F <sup>2</sup> | 1.139                                                                                                                  |
| Final R indices [I > 2σ(I)]       | R1 = 0.0419, wR2 = 0.1237                                                                                              |
| R indices (all data)              | R1 = 0.0518, wR2 = 0.1589                                                                                              |
| Largest diff. peak and hole       | 0.319 and -0.382 e.Å <sup>-3</sup>                                                                                     |

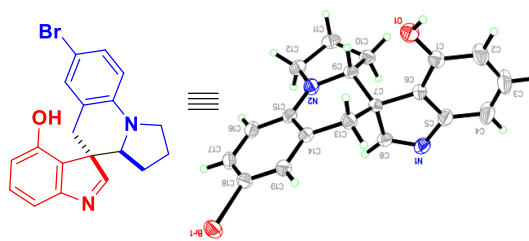

**7c (CCDC1922516)**

Table 1. Crystal data and structure refinement for **7c**.

|                                   |                                                                                                                   |
|-----------------------------------|-------------------------------------------------------------------------------------------------------------------|
| Identification code               | <b>7c</b>                                                                                                         |
| Empirical formula                 | C <sub>20</sub> H <sub>21</sub> BrN <sub>2</sub> O <sub>2</sub>                                                   |
| Formula weight                    | 401.30                                                                                                            |
| Temperature                       | 293(2) K                                                                                                          |
| Wavelength                        | 1.54178 Å                                                                                                         |
| Crystal system, space group       | orthorhombic, Pna21                                                                                               |
| Unit cell dimensions              | a = 20.4146(3) Å    alpha = 90 deg.<br>b = 6.41670(10) Å    beta = 90 deg.<br>c = 14.0402(2) Å    gamma = 90 deg. |
| Volume                            | 1839.19(5) Å <sup>3</sup>                                                                                         |
| Z, Calculated density             | 4, 1.449 Mg/m <sup>3</sup>                                                                                        |
| Absorption coefficient            | 3.168 mm <sup>-1</sup>                                                                                            |
| F(000)                            | 824                                                                                                               |
| Crystal size                      | 0.13 x 0.12 x 0.11 mm                                                                                             |
| Theta range for data collection   | 4.33 to 67.21 deg.                                                                                                |
| Limiting indices                  | -24 ≤ h ≤ 24, -7 ≤ k ≤ 6, -16 ≤ l ≤ 10                                                                            |
| Reflections collected / unique    | 11838 / 2786 [R(int) = 0.0230]                                                                                    |
| Completeness to theta = 67.21     | 100.0 %                                                                                                           |
| Max. and min. transmission        | 0.7220 and 0.6835                                                                                                 |
| Refinement method                 | Full-matrix least-squares on F <sup>2</sup>                                                                       |
| Goodness-of-fit on F <sup>2</sup> | 1.093                                                                                                             |
| Final R indices [I > 2σ(I)]       | R1 = 0.0261, wR2 = 0.0698                                                                                         |
| R indices (all data)              | R1 = 0.0271, wR2 = 0.0705                                                                                         |
| Largest diff. peak and hole       | 0.183 and -0.423 e.Å <sup>-3</sup>                                                                                |

## 6. <sup>1</sup>H and <sup>13</sup>C-NMR Spectra

### 1',2',3',3a'-tetrahydro-5'H-spiro[indole-5,4'-pyrrolo[1,2-a]quinolin]-4(1H)-one (3a)

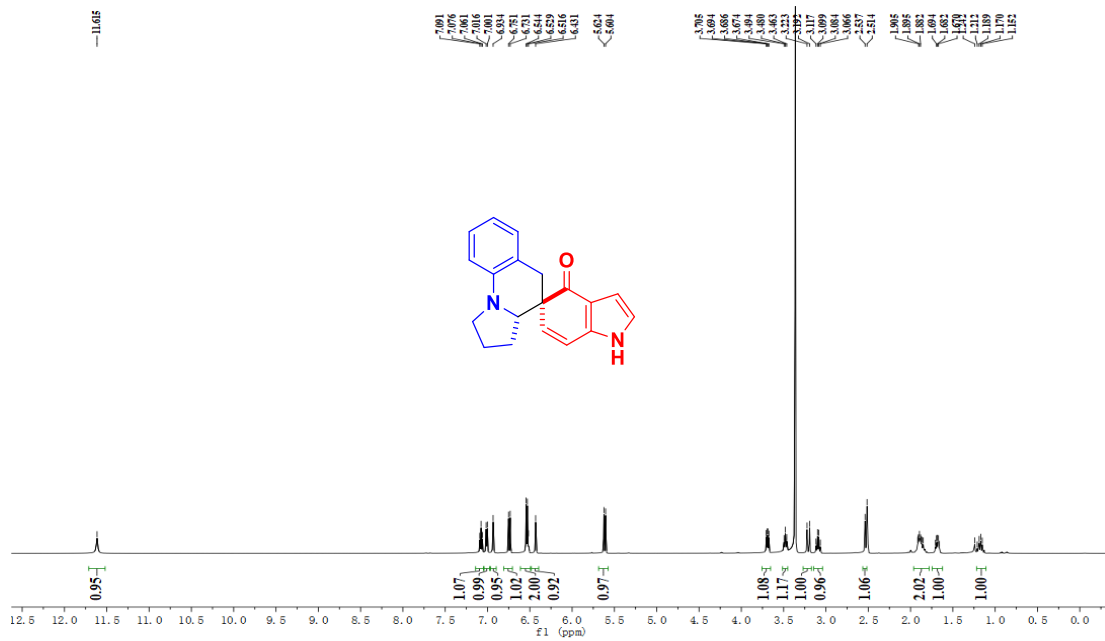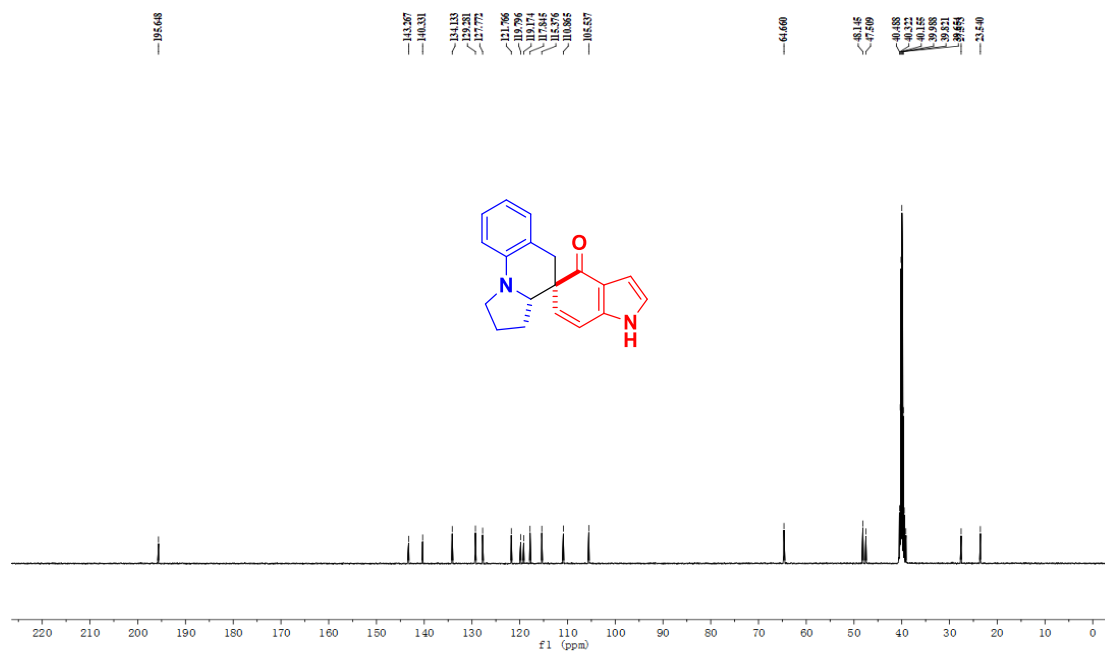

**8'-methyl-1',2',3',3a'-tetrahydro-5'H-spiro[indole-5,4'-pyrrolo[1,2-a]quinolin]-4(1H)-one (3b)**

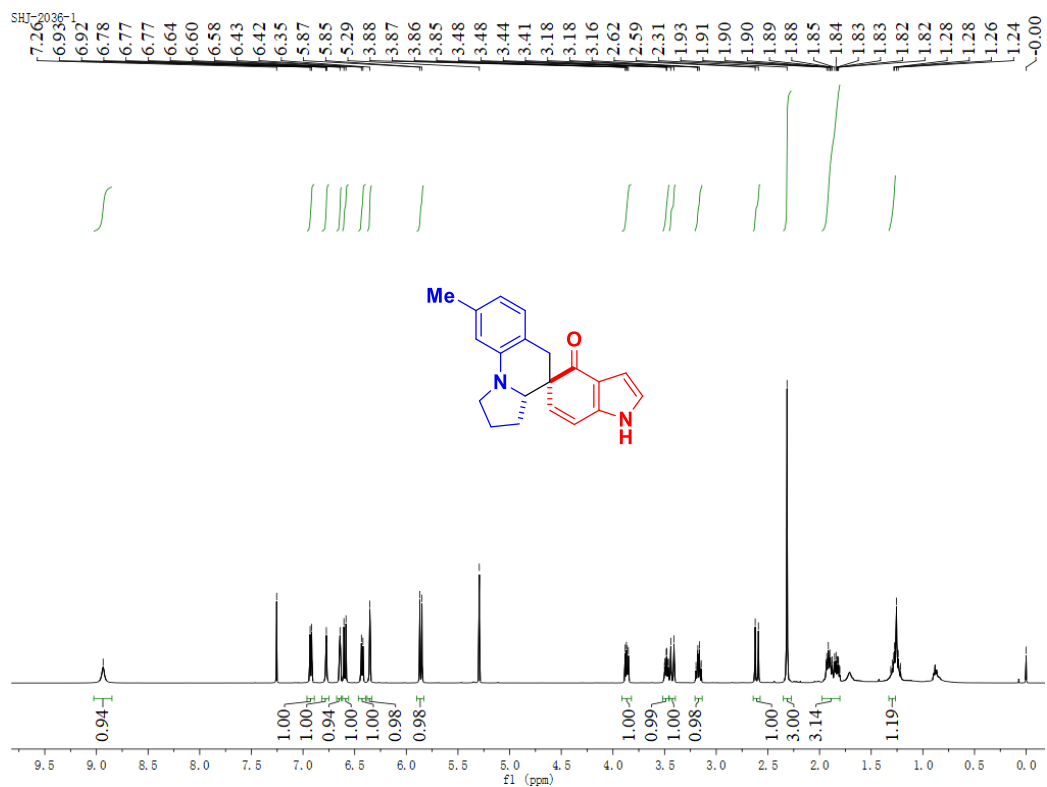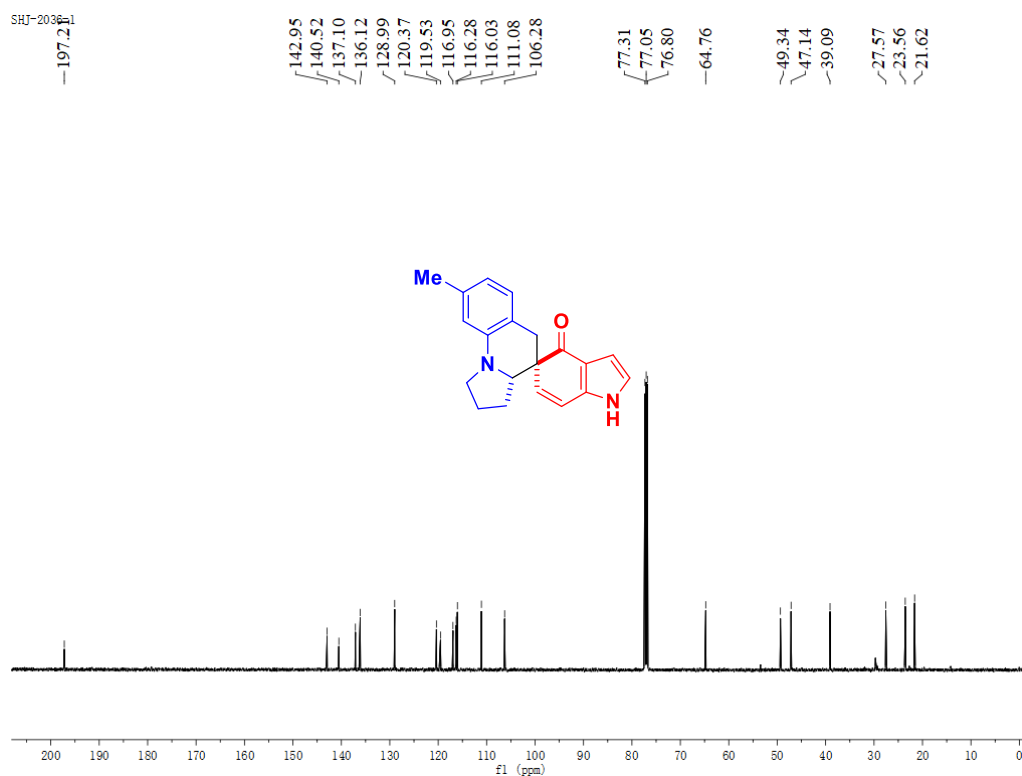

**8'-(trifluoromethyl)-1',2',3',3a'-tetrahydro-5'H-spiro[indole-5,4'-pyrrolo[1,2-a]quinolin]-4(1H)-one (3c)**

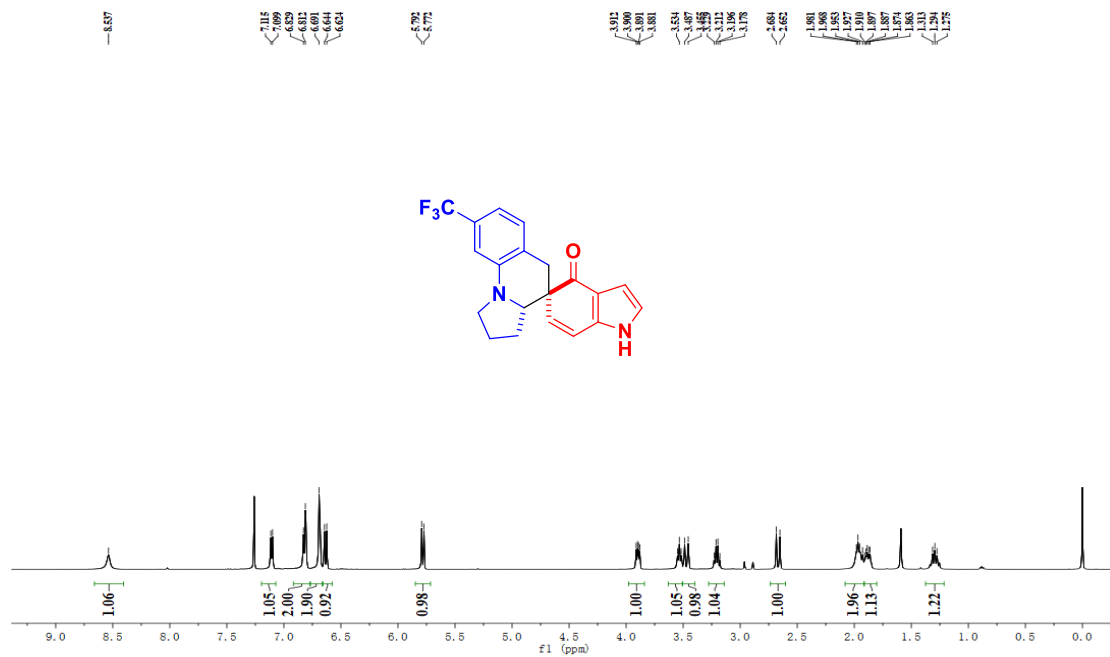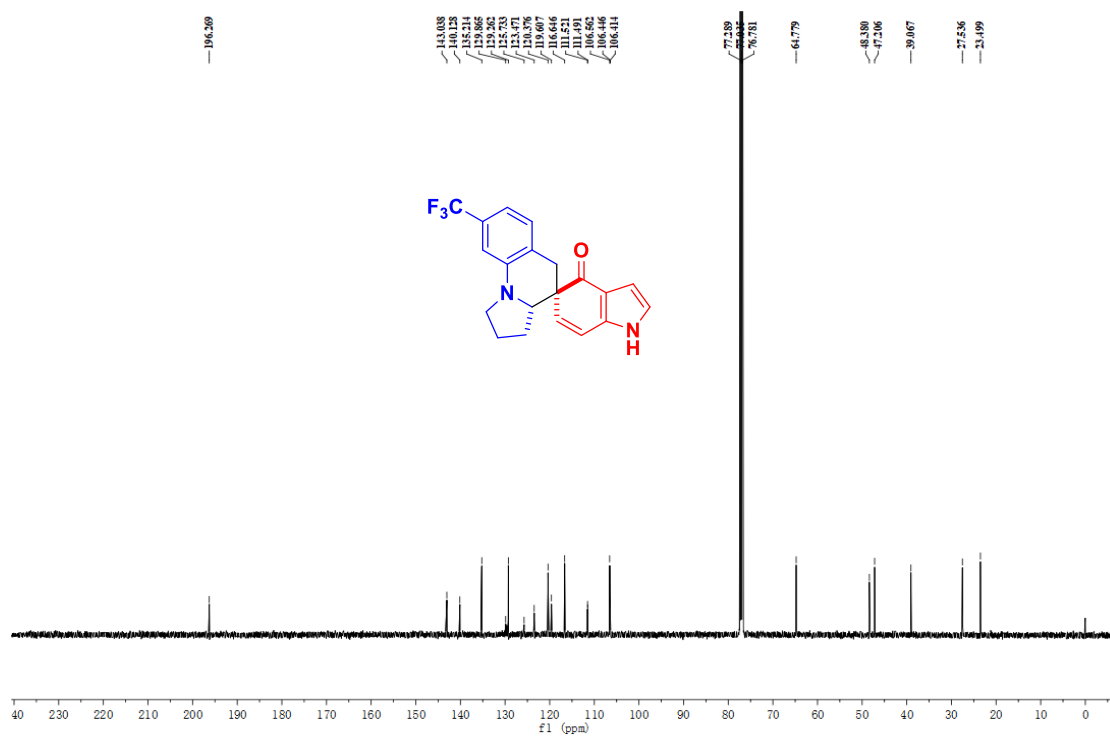

8'-chloro-1',2',3',3a'-tetrahydro-5'H-spiro[indole-5,4'-pyrrolo[1,2-a]quinolin]-4(1H)-one (3d)

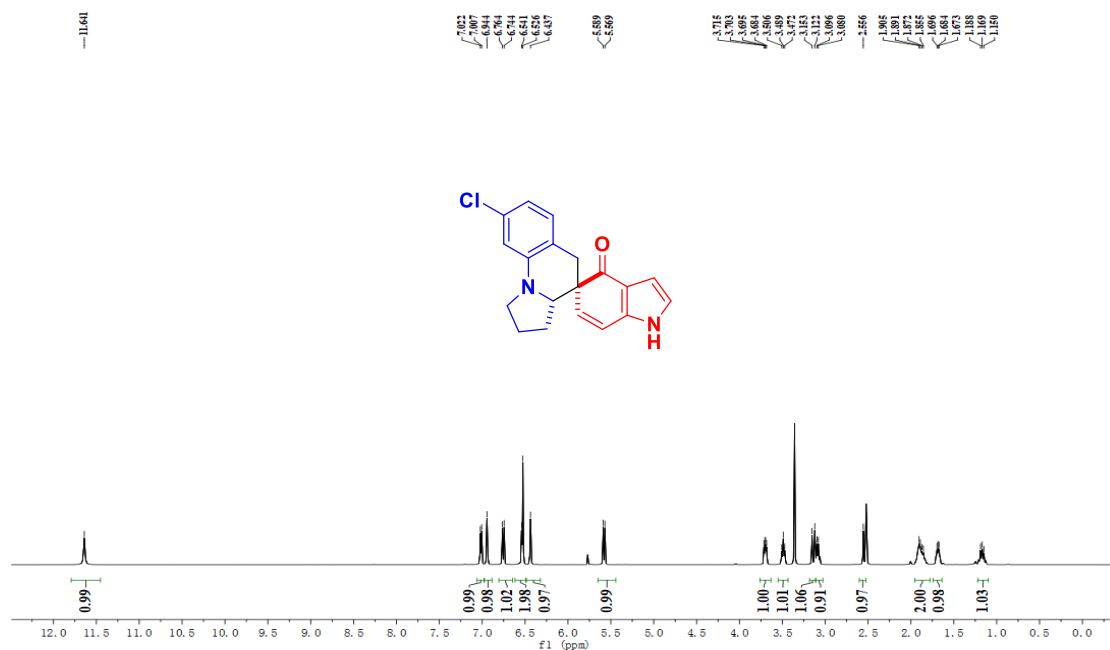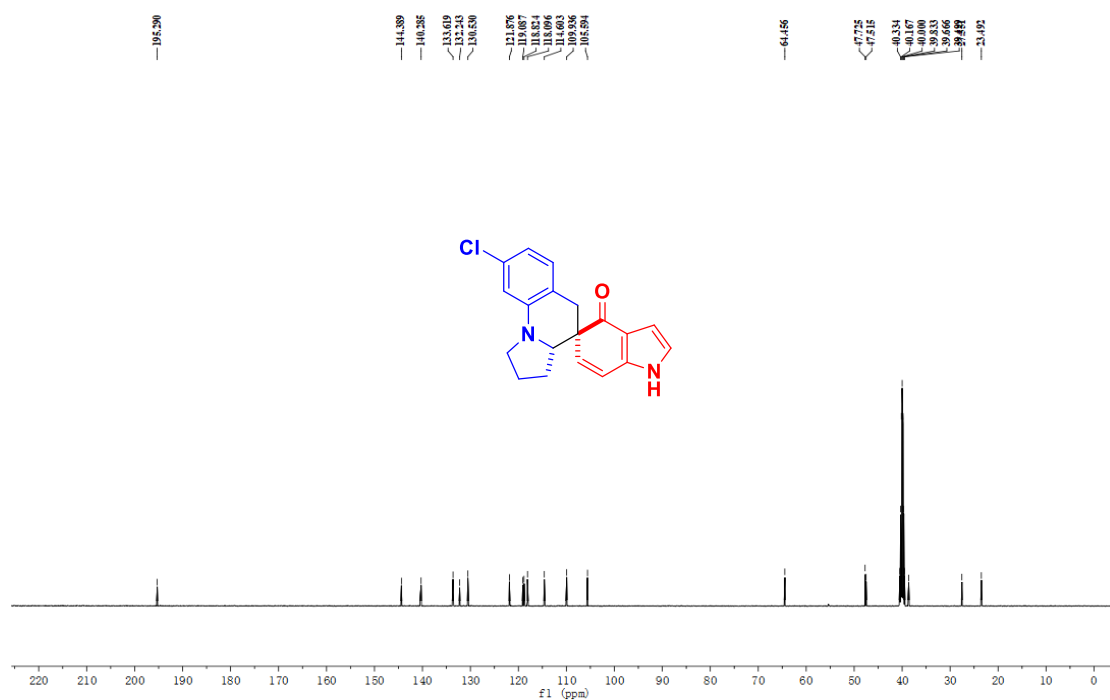

**4-oxo-1,1',2',3',3a',4-hexahydro-5'H-spiro[indole-5,4'-pyrrolo[1,2-a]quinoline]-8'-carbonitrile (3e)**

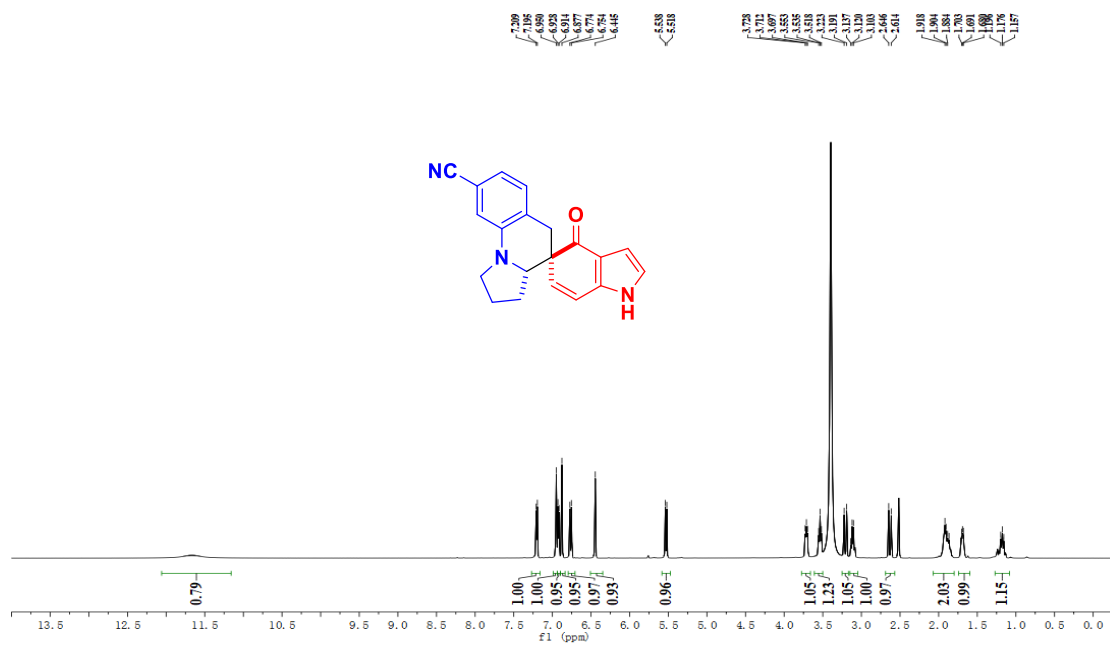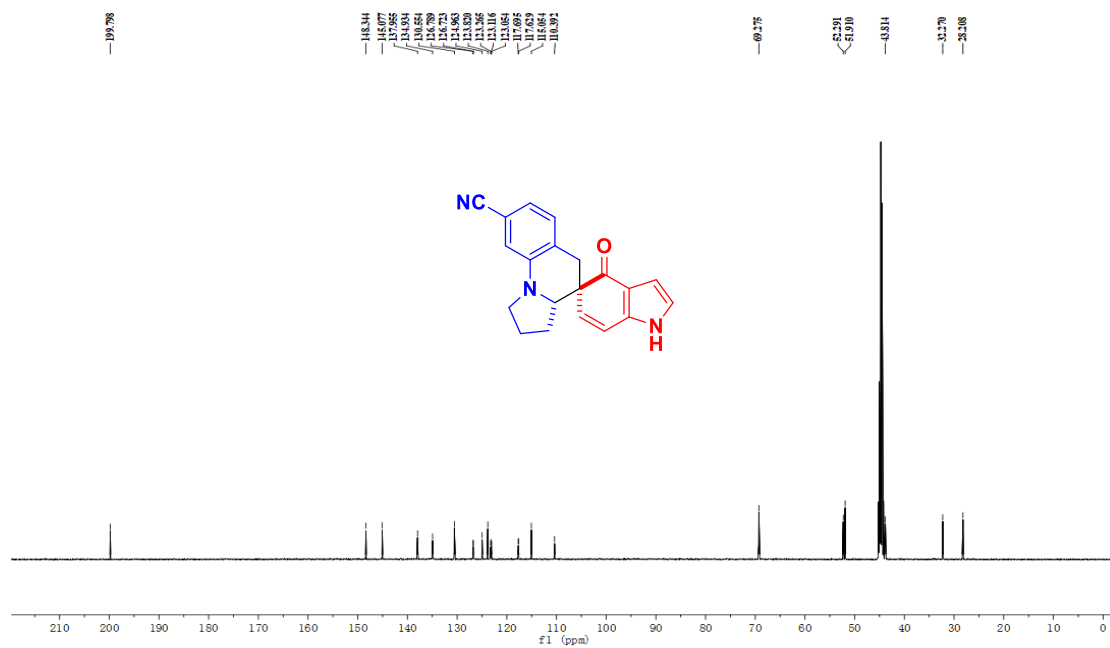



**methyl(*E*)-3-(4-oxo-1,1',2',3',3a',4-hexahydro-5'*H*-spiro[indole-5,4'-pyrrolo[1,2-*a*]quinolin]-8'-yl)acrylate (3f)**

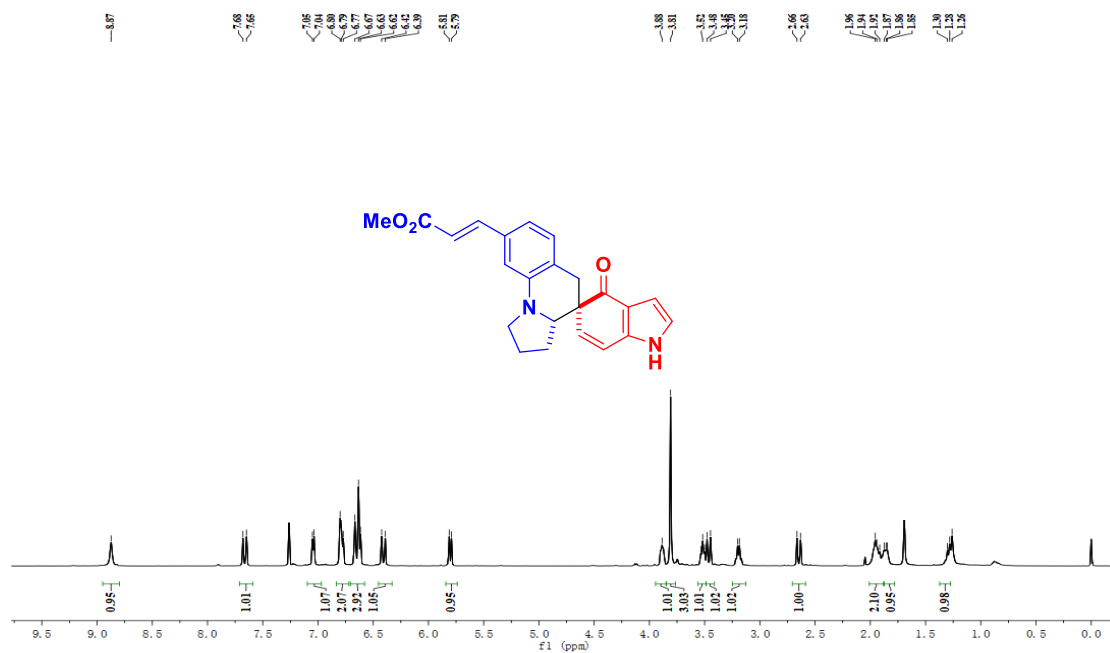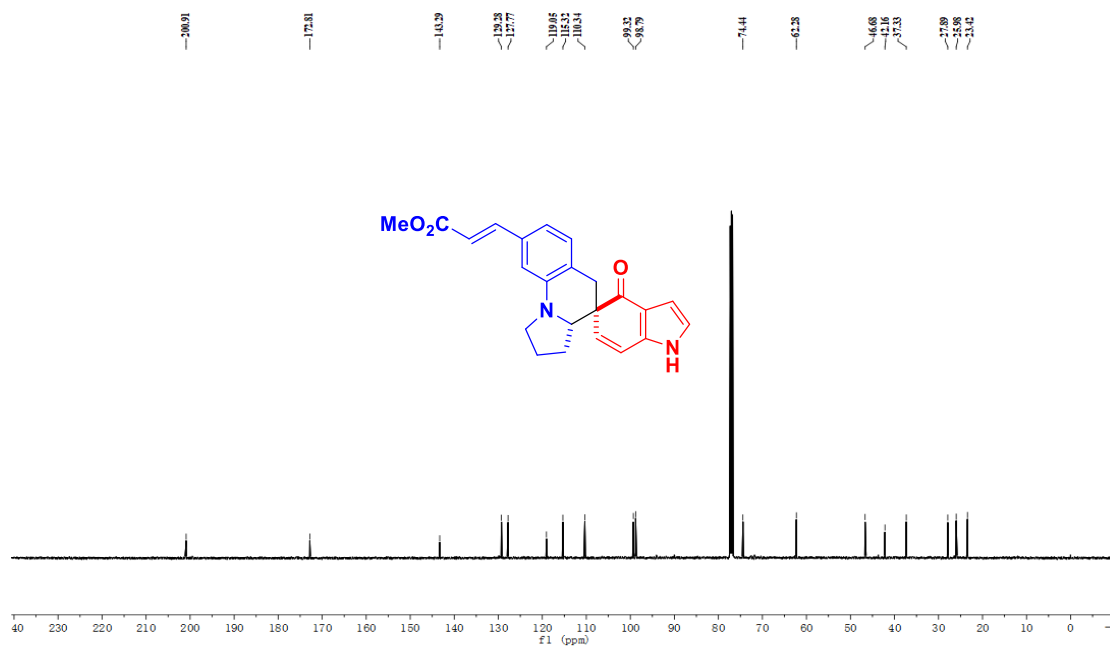

**8'-((4-methoxyphenyl)ethynyl)-1',2',3',3a'-tetrahydro-5'H-spiro[indole-5,4'-pyrrolo[1,2-a]quinolin]-4(1H)-one (3g)**

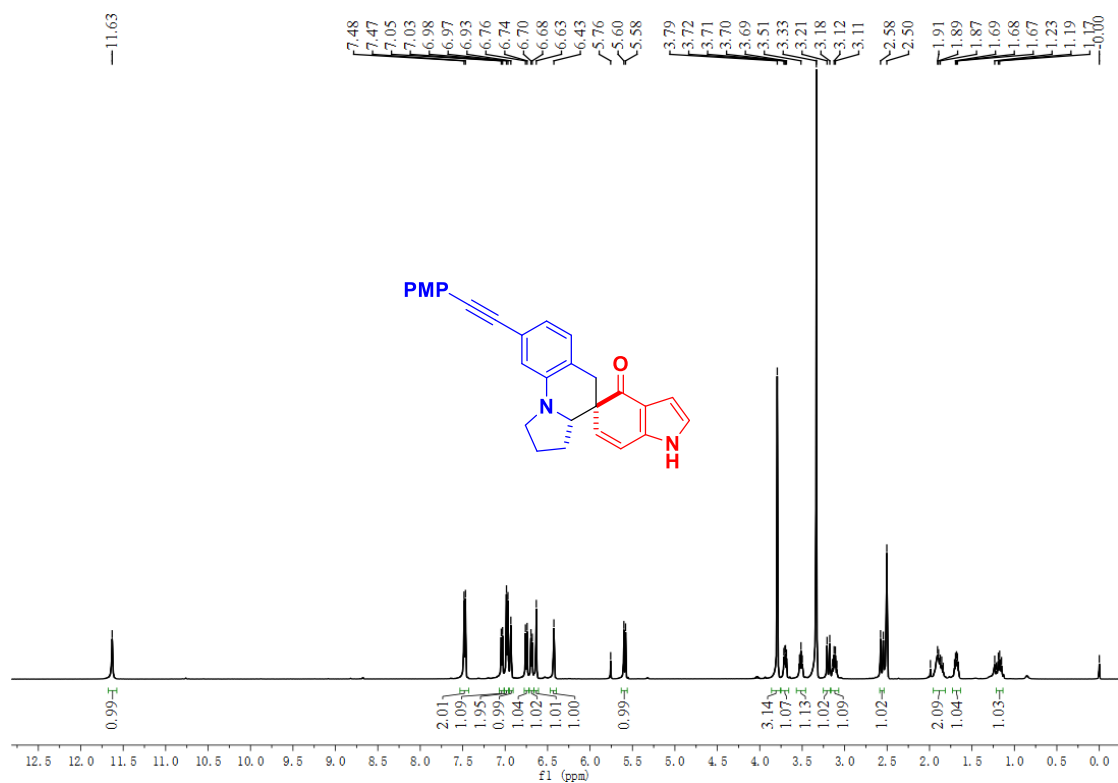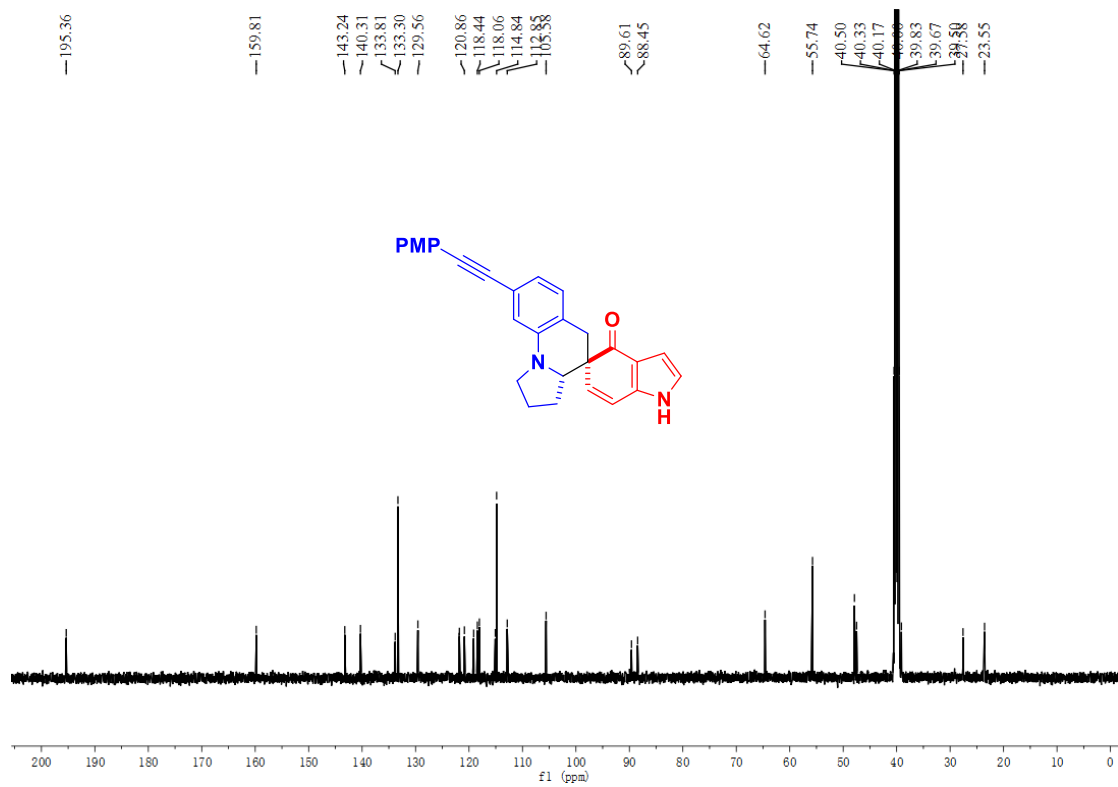

**8'-(thiophen-2-yl)-1',2',3',3a'-tetrahydro-5'H-spiro[indole-5,4'-pyrrolo[1,2-a]quinolin]-4(1H)-one (3h)**

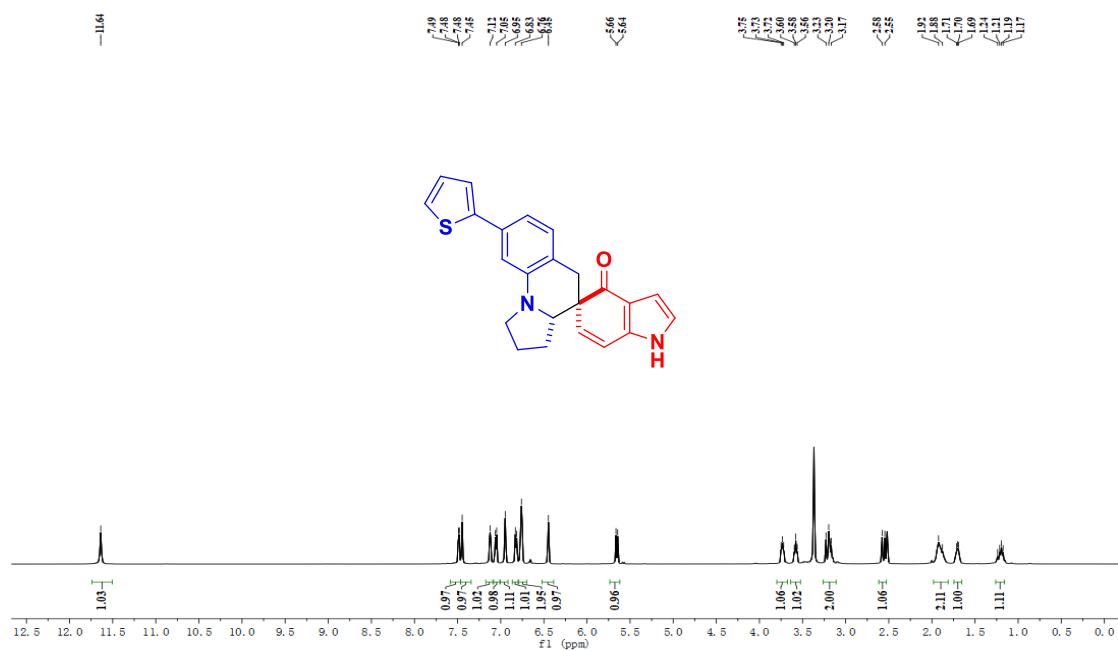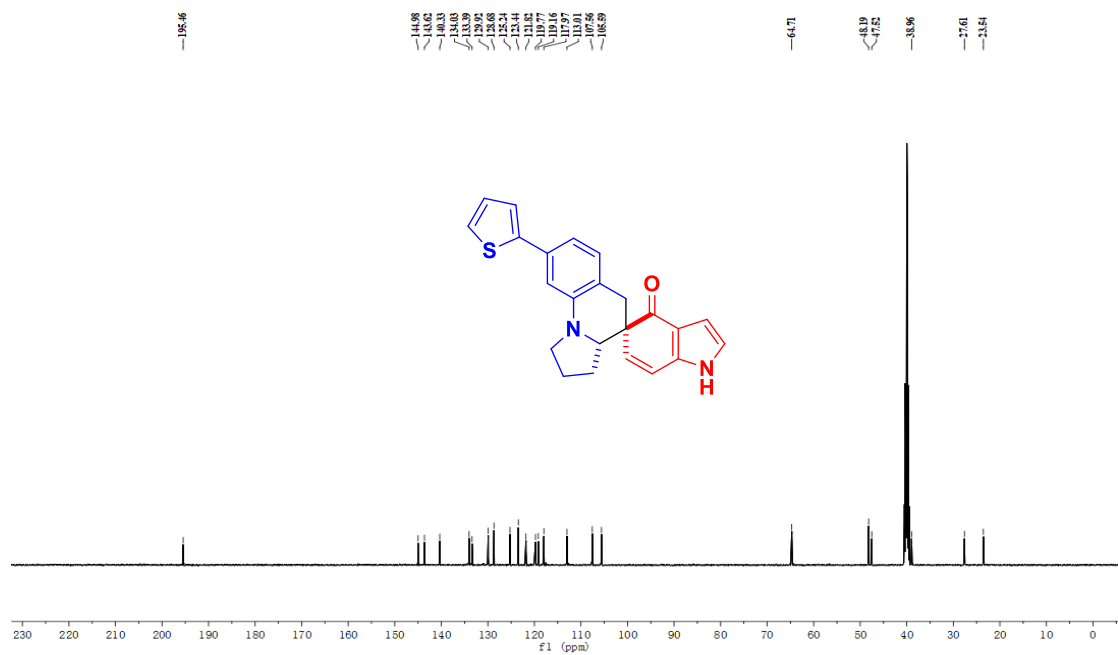

7'-chloro-1',2',3',3a'-tetrahydro-5'H-spiro[indole-5,4'-pyrrolo[1,2-a]quinolin]-4(1H)-one (3i)

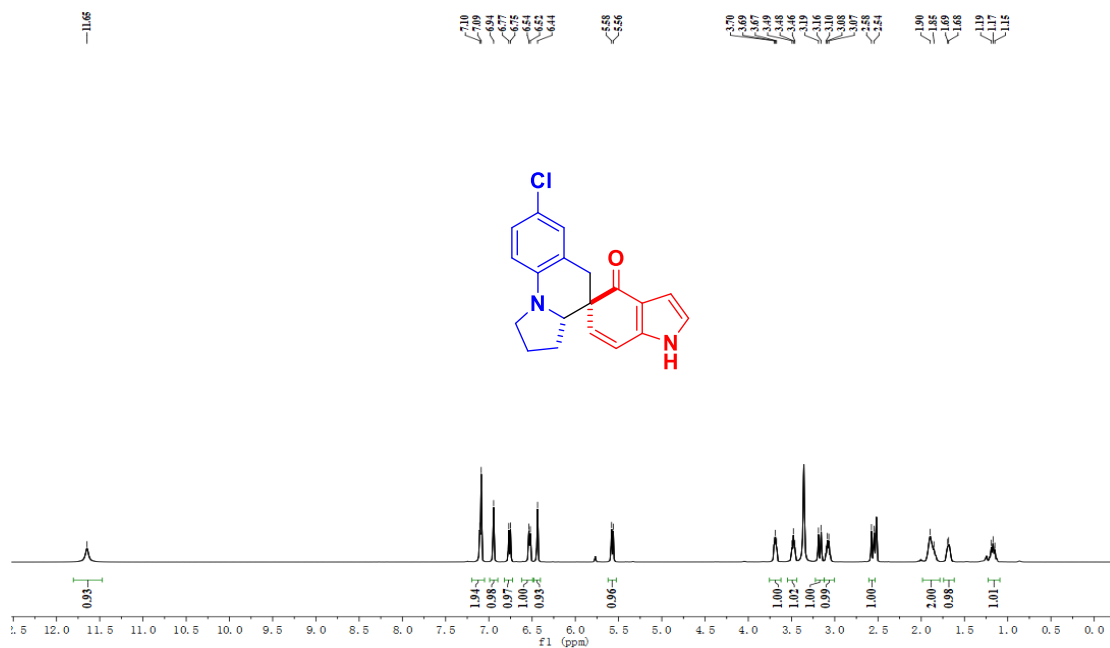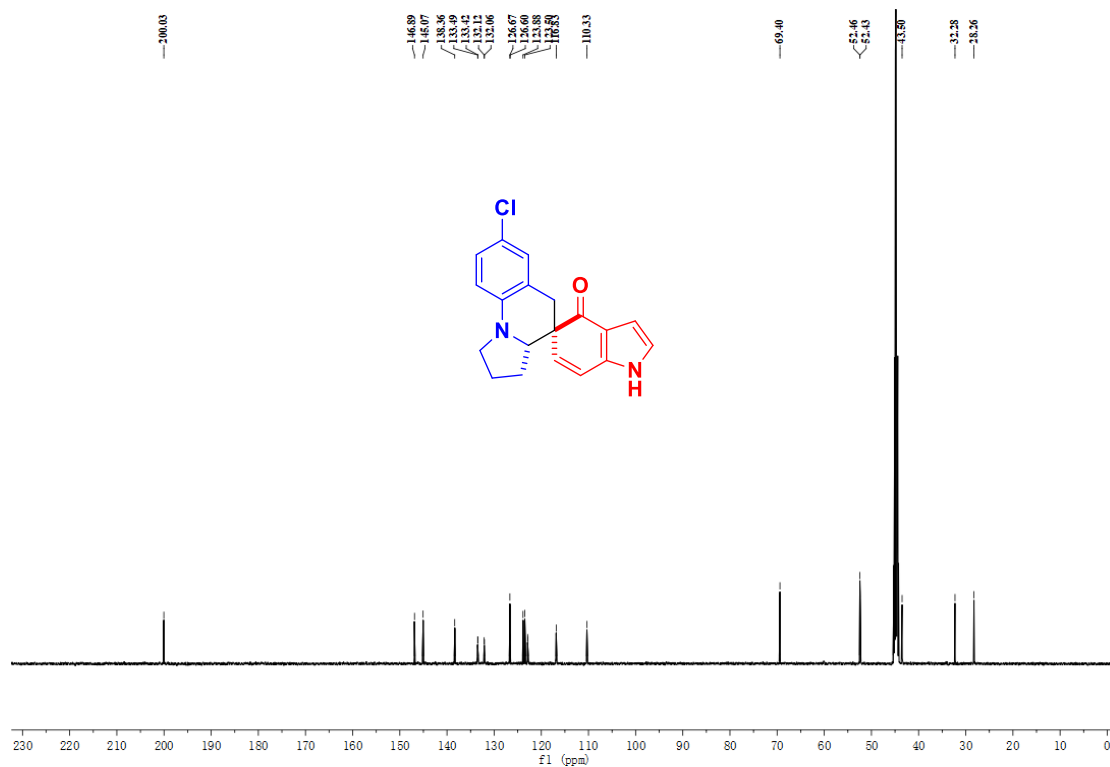

7'-methoxy-1',2',3',3a'-tetrahydro-5'H-spiro[indole-5,4'-pyrrolo[1,2-a]quinolin]-4(1H)-one  
(3j)

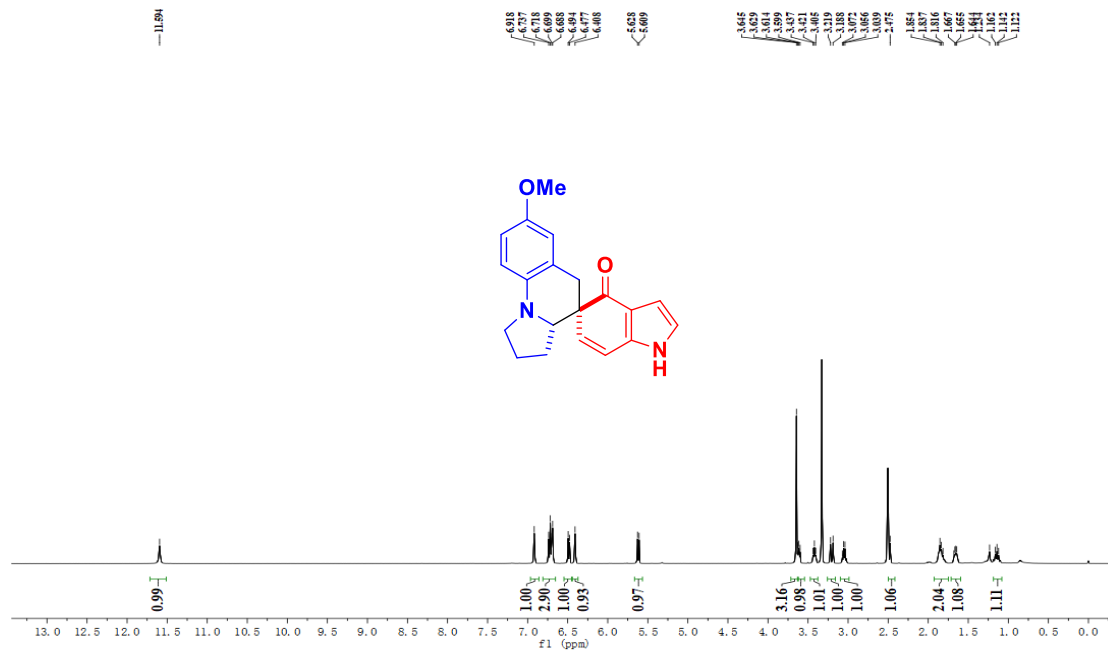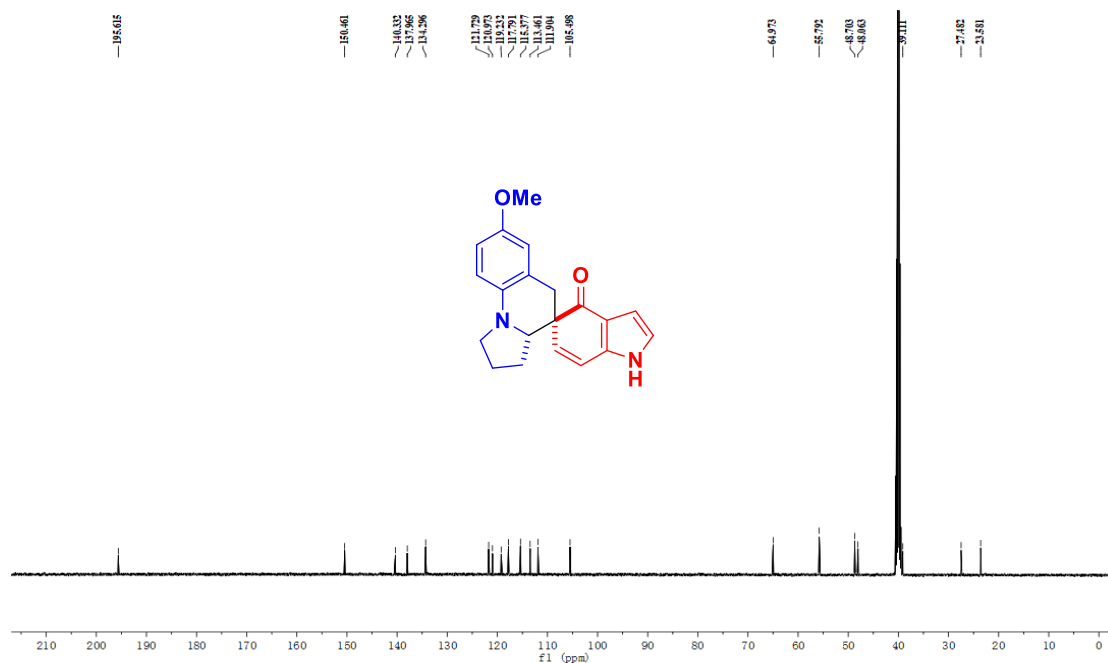

6'-fluoro-1',2',3',3a'-tetrahydro-5'H-spiro[indole-5,4'-pyrrolo[1,2-a]quinolin]-4(1H)-one (3k)

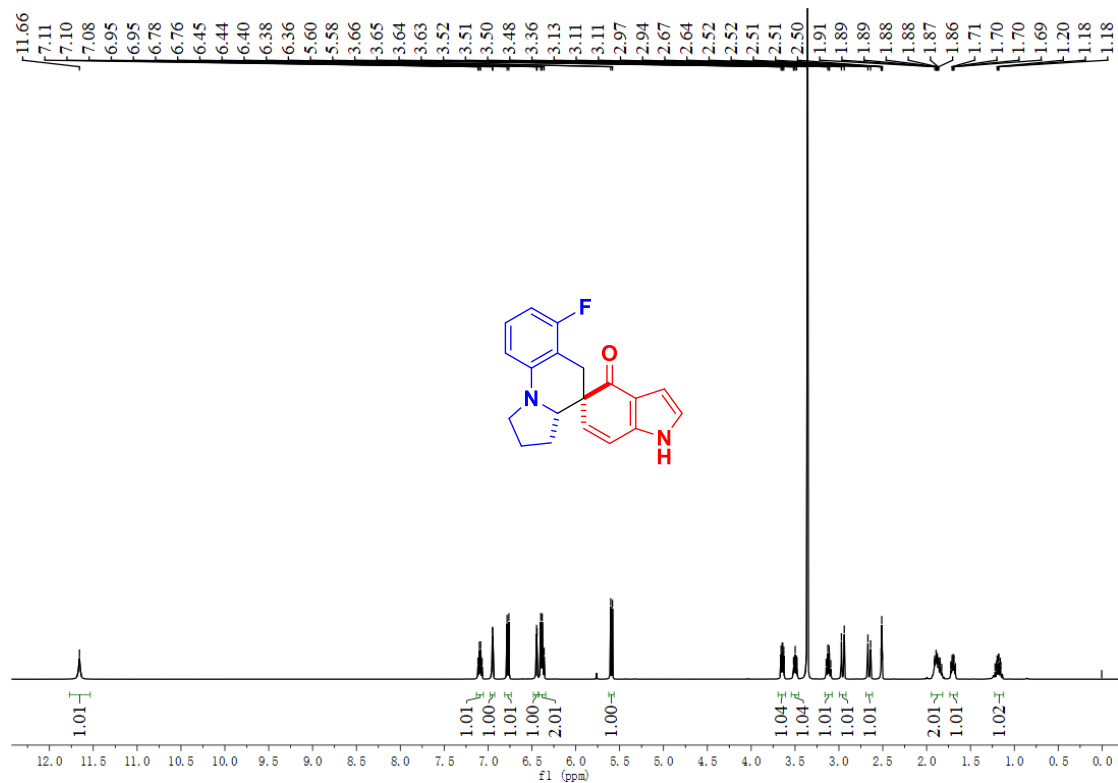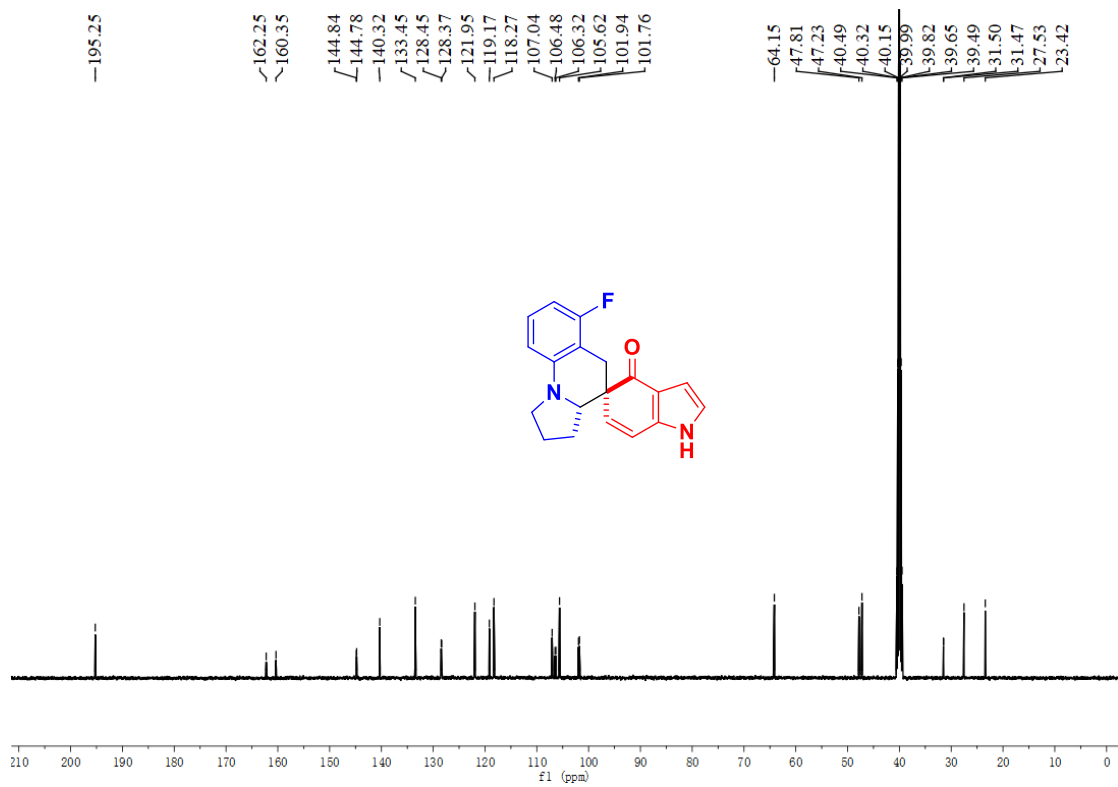

6'-chloro-1',2',3',3a'-tetrahydro-5'H-spiro[indole-5,4'-pyrrolo[1,2-a]quinolin]-4(1H)-one (3l)

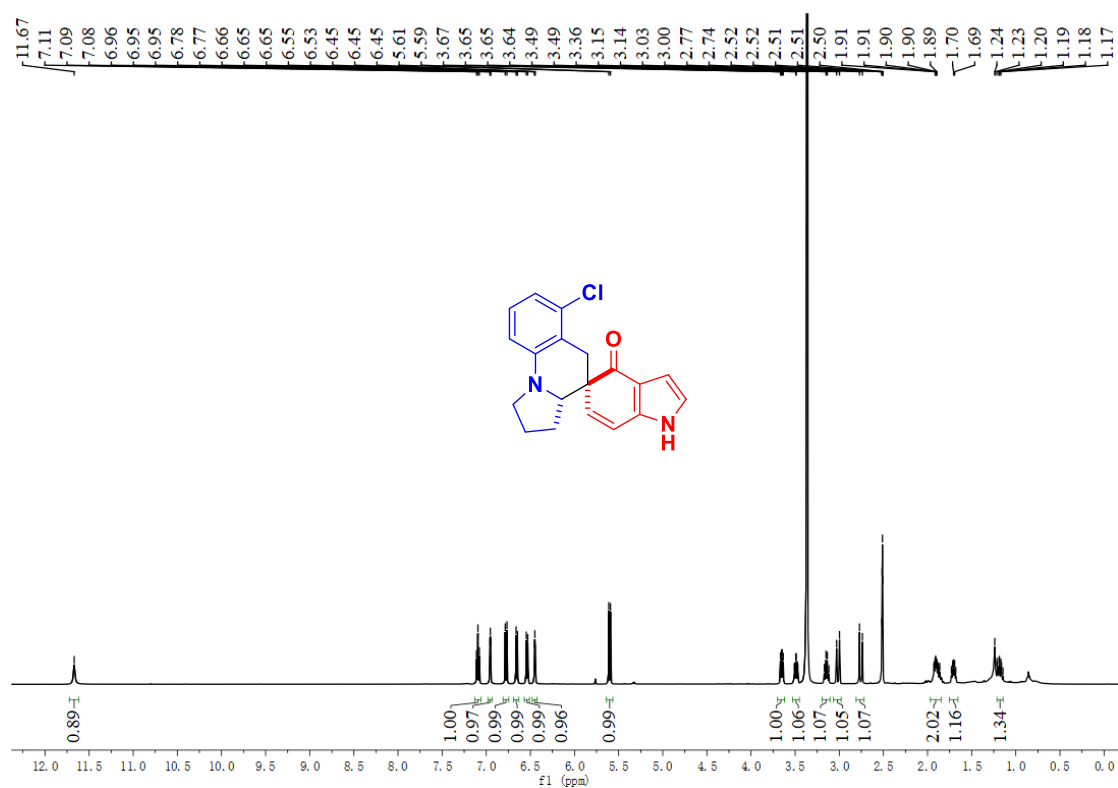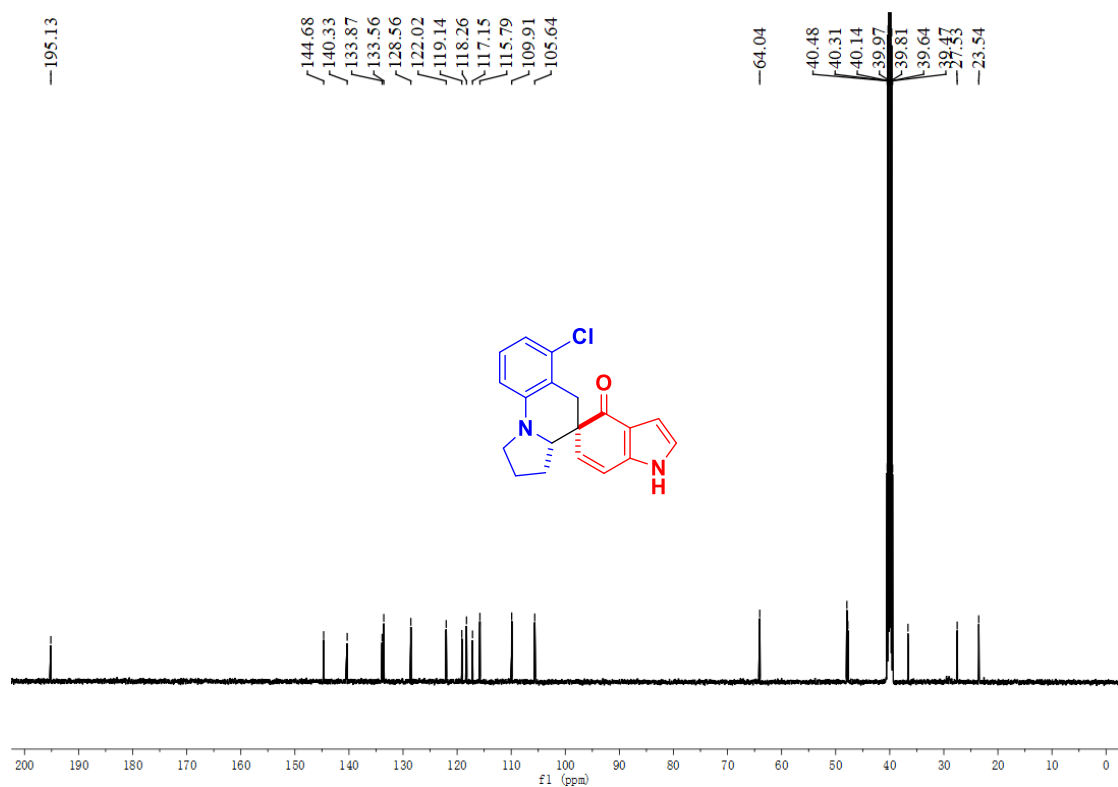

6'-bromo-1',2',3',3a'-tetrahydro-5'H-spiro[indole-5,4'-pyrrolo[1,2-a]quinolin]-4(1H)-one (3m)

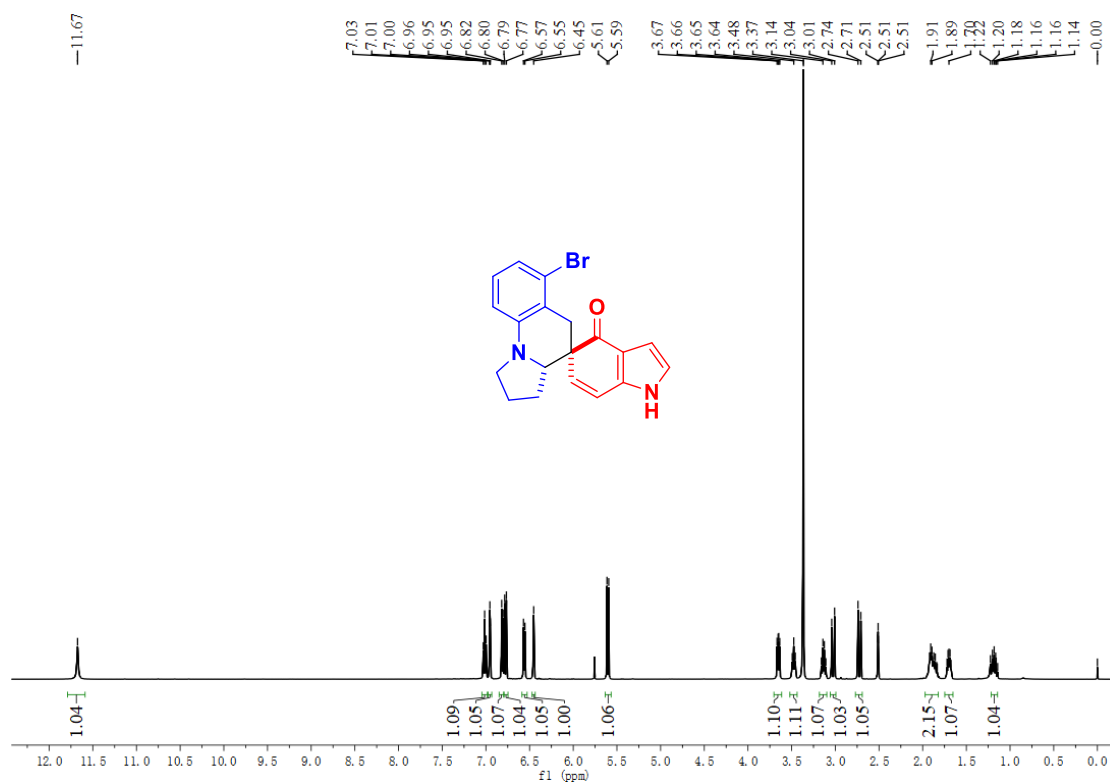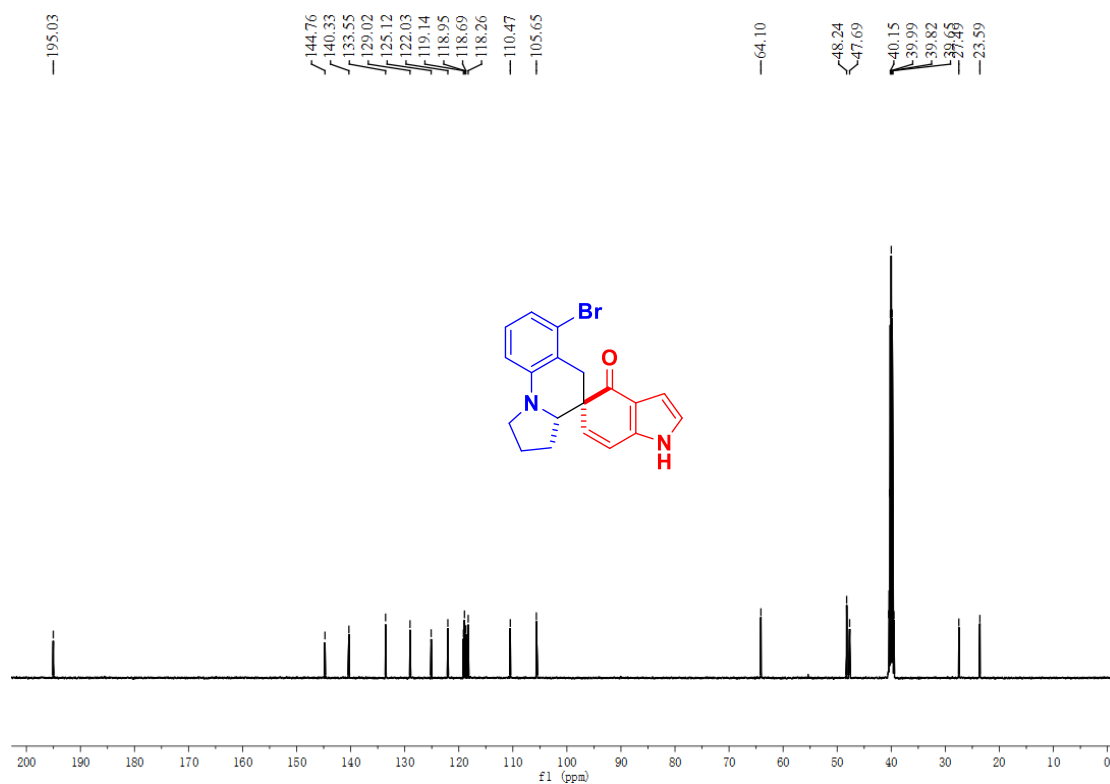



**6'-(pyrrolidin-1-yl)-1',2',3',3a'-tetrahydro-5'H-spiro[indole-5,4'-pyrrolo[1,2-a]quinolin]-4(1H)-one (3n)**

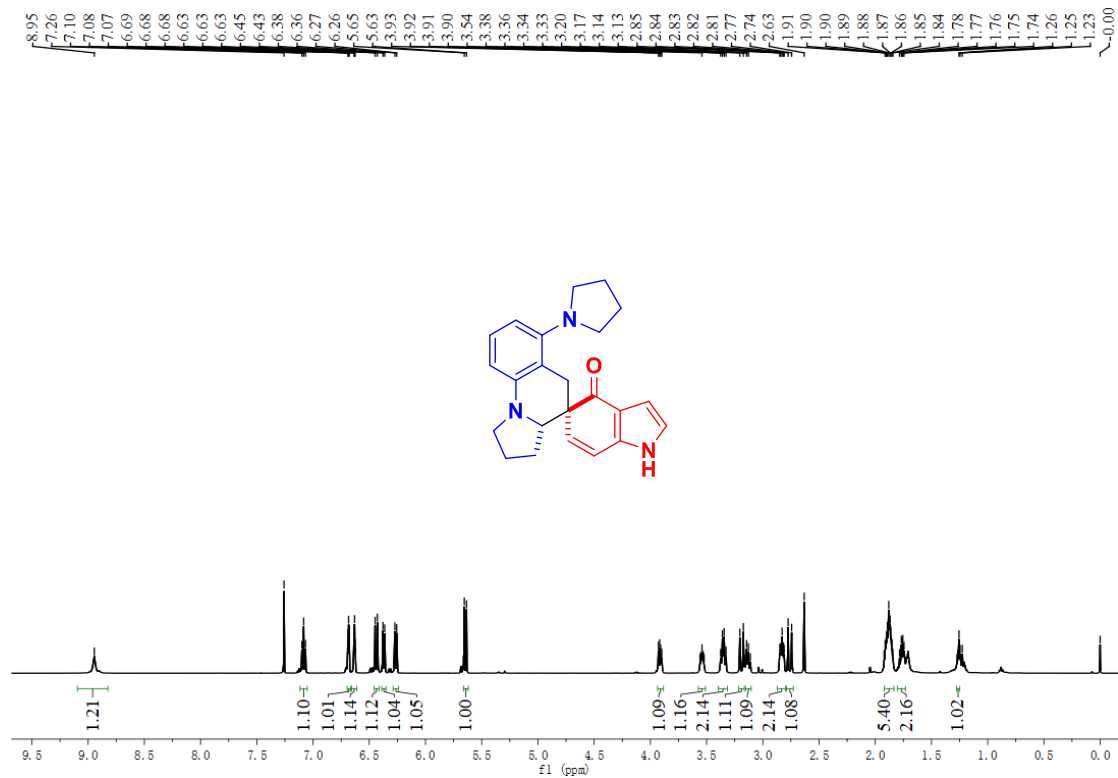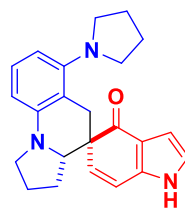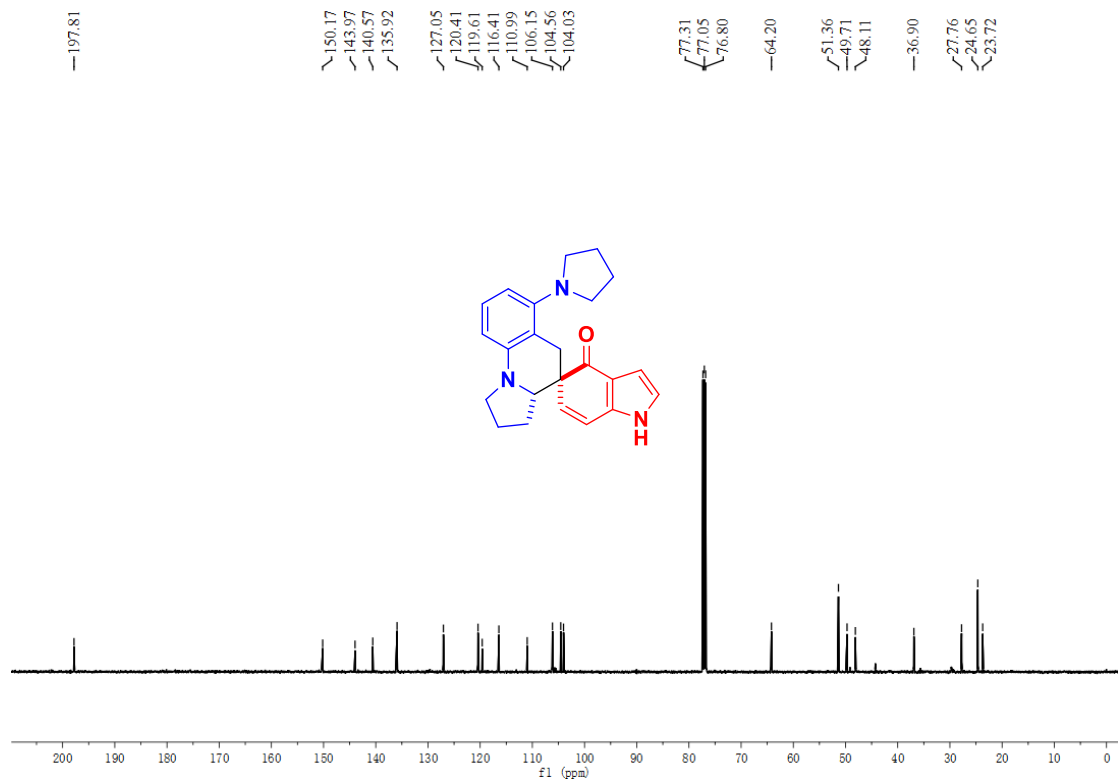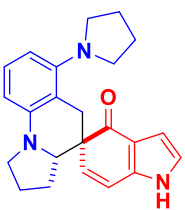

**6a',6b',7',8',9',10',10a',11'-octahydro-5'H-spiro[indole-5,6'-isoindolo[2,1-a]quinolin]-4(1H)-one (30)**

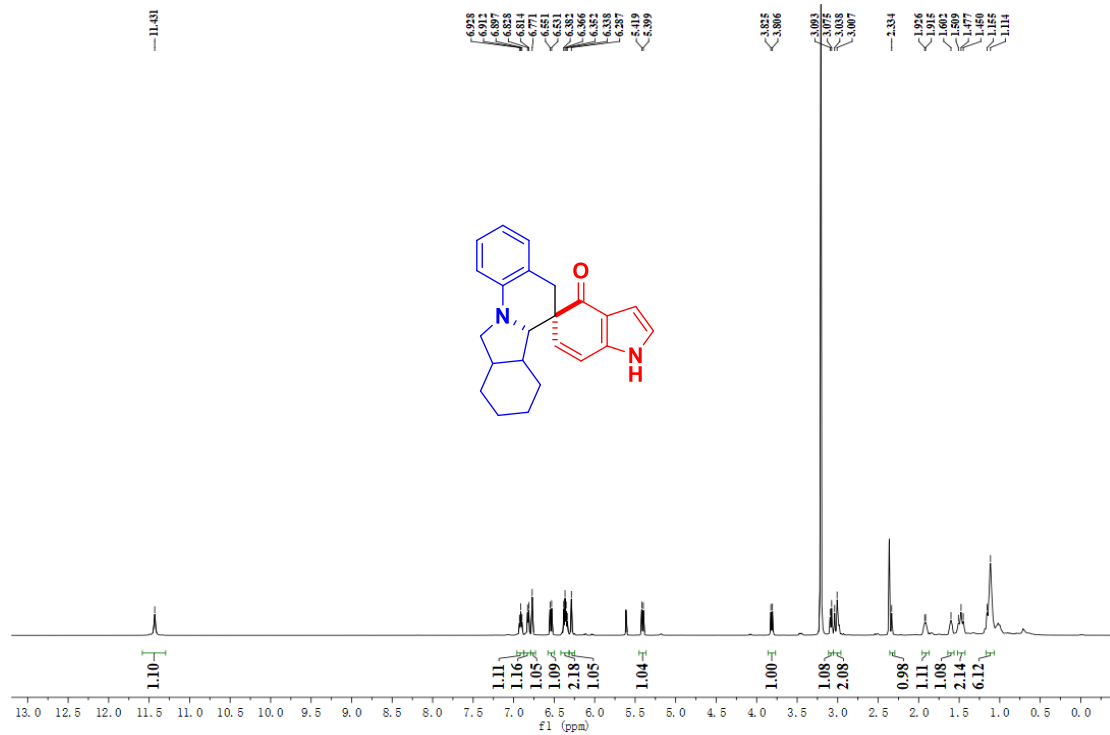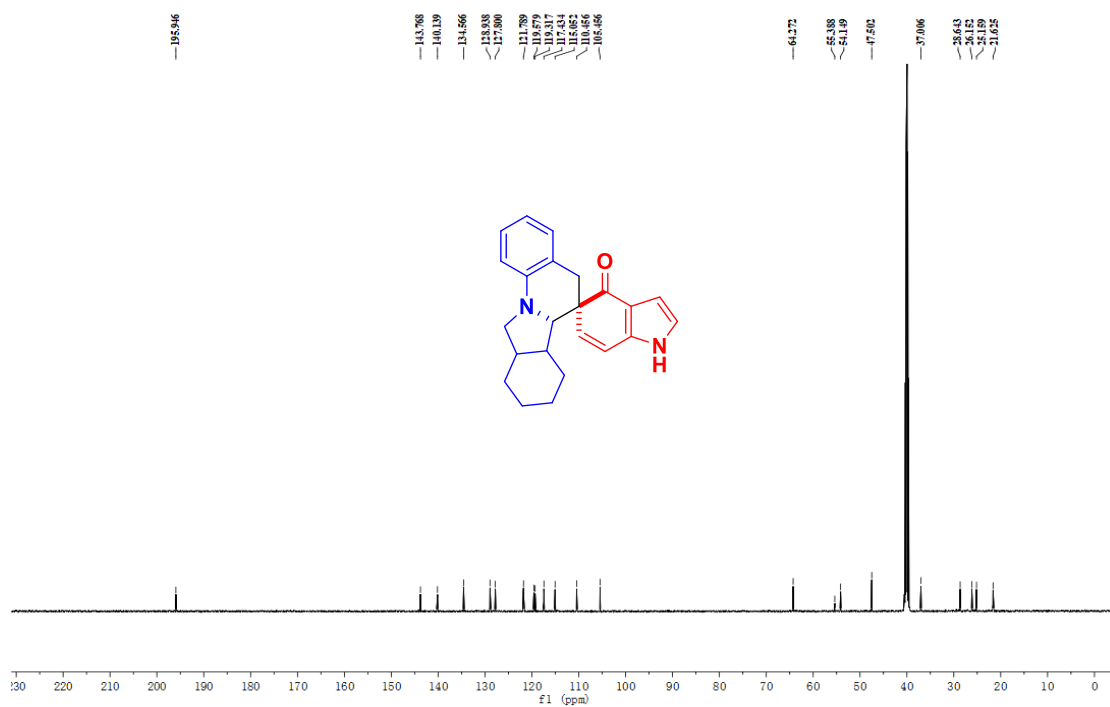

**2-methyl-6a,7,8,9,10,11-hexahydro-5H-spiro[azepino[1,2-a]quinoline-6,5'-indol]-4'(1'H)-one  
(3p)**

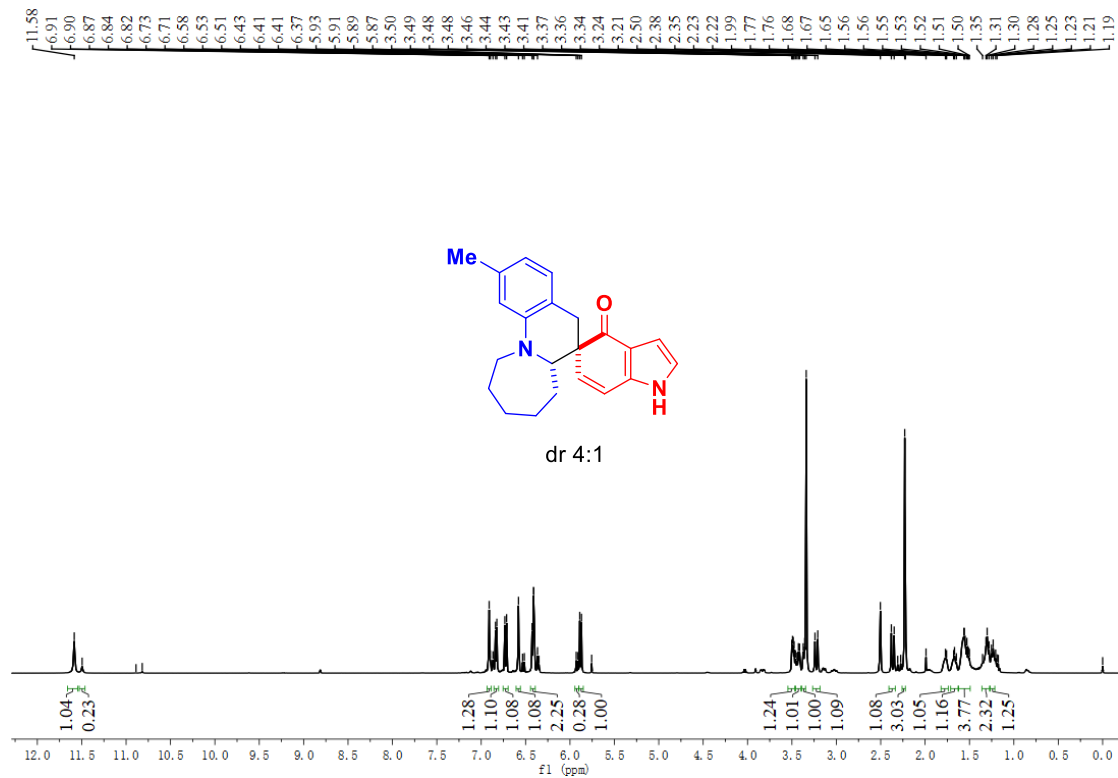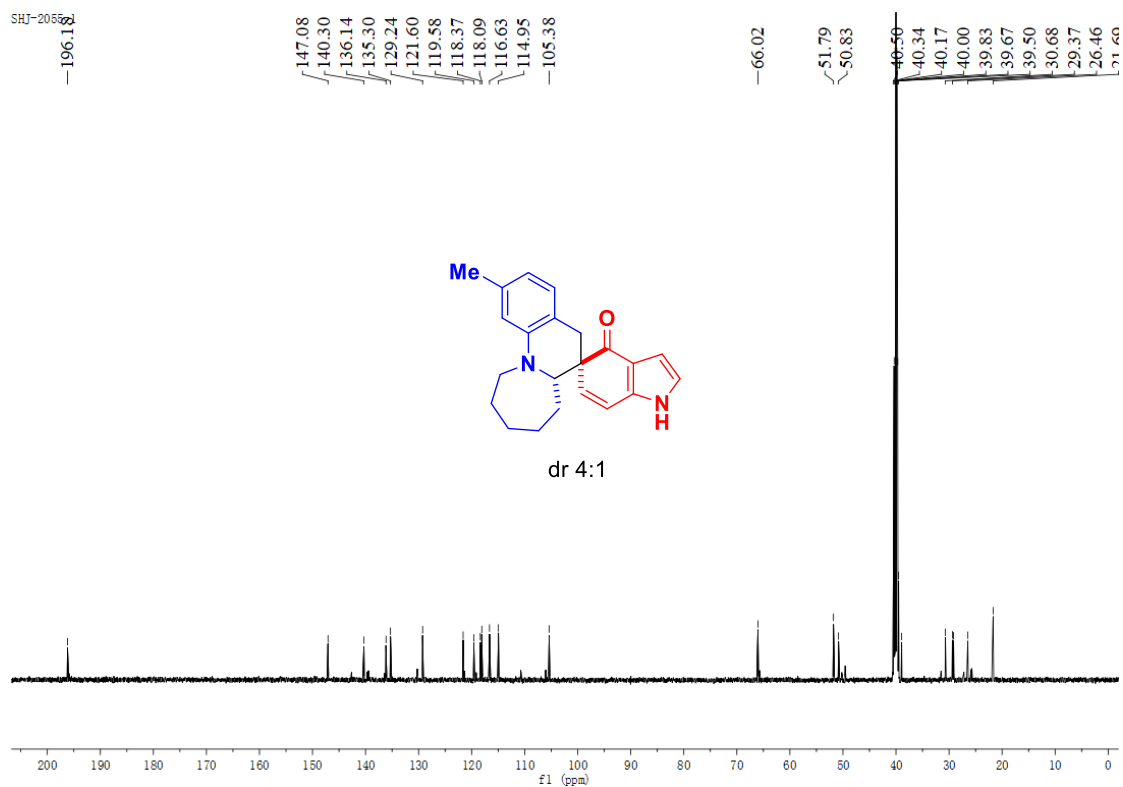

**2-methoxy-6a,7,8,9,10,11-hexahydro-5H-spiro[azepino[1,2-a]quinoline-6,5'-indol]-4'(1'H)-one (3q)**

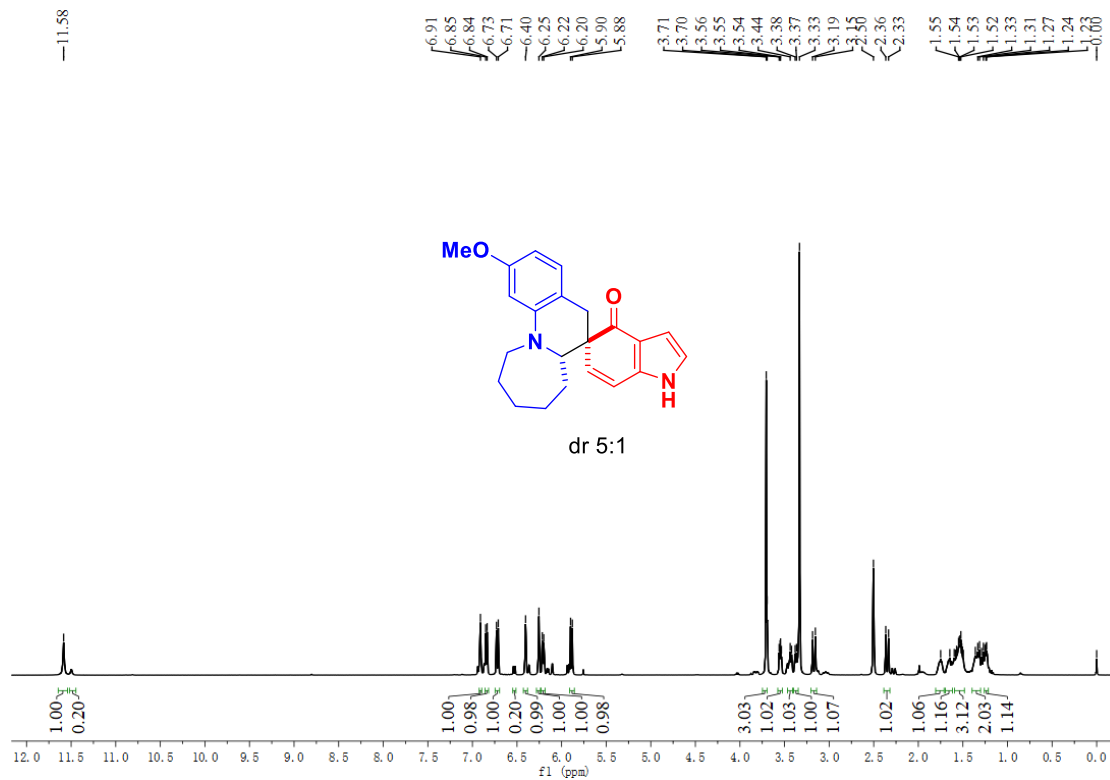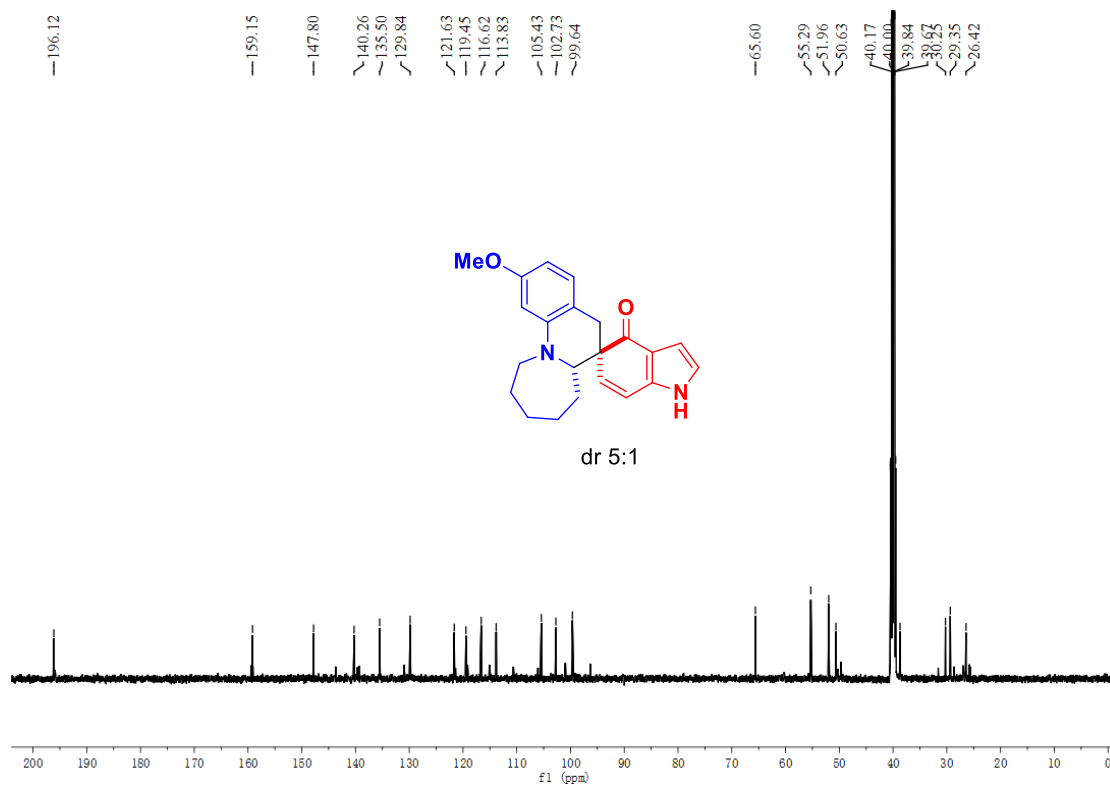

**2-chloro-6a,7,8,9,10,11-hexahydro-5H-spiro[azepino[1,2-a]quinoline-6,5'-indol]-4'(1'H)-one  
(3r)**

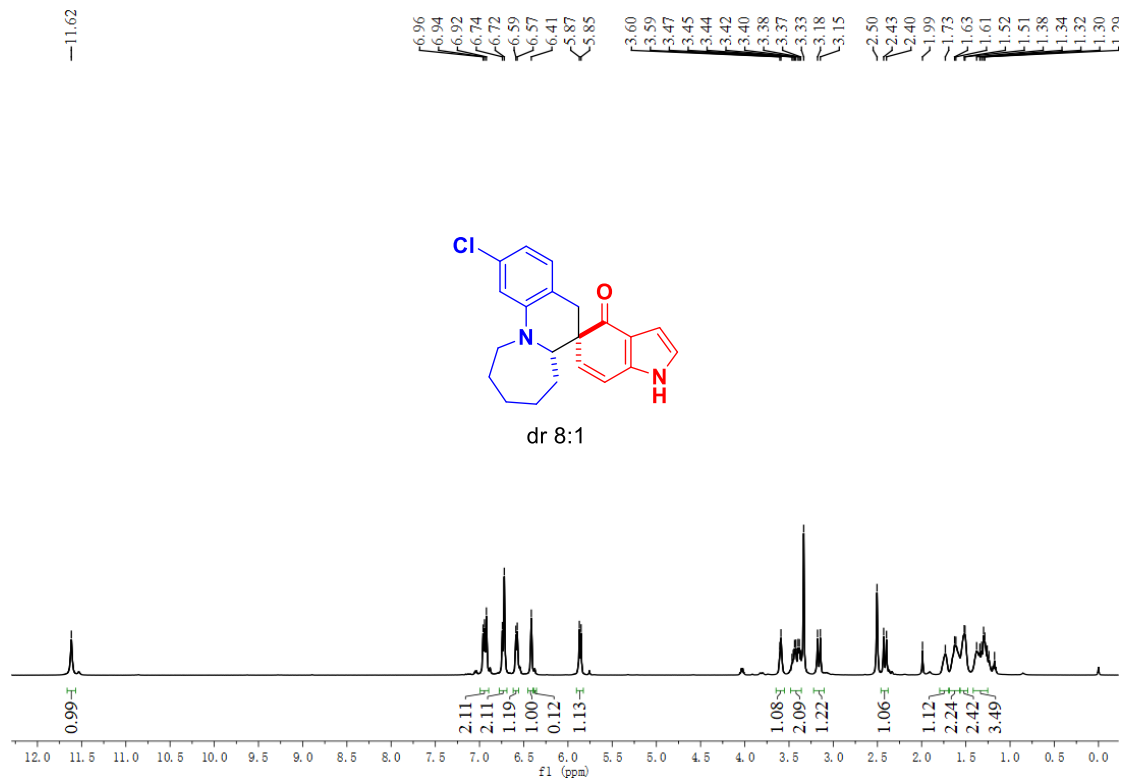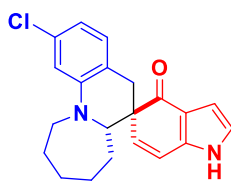

dr 8:1

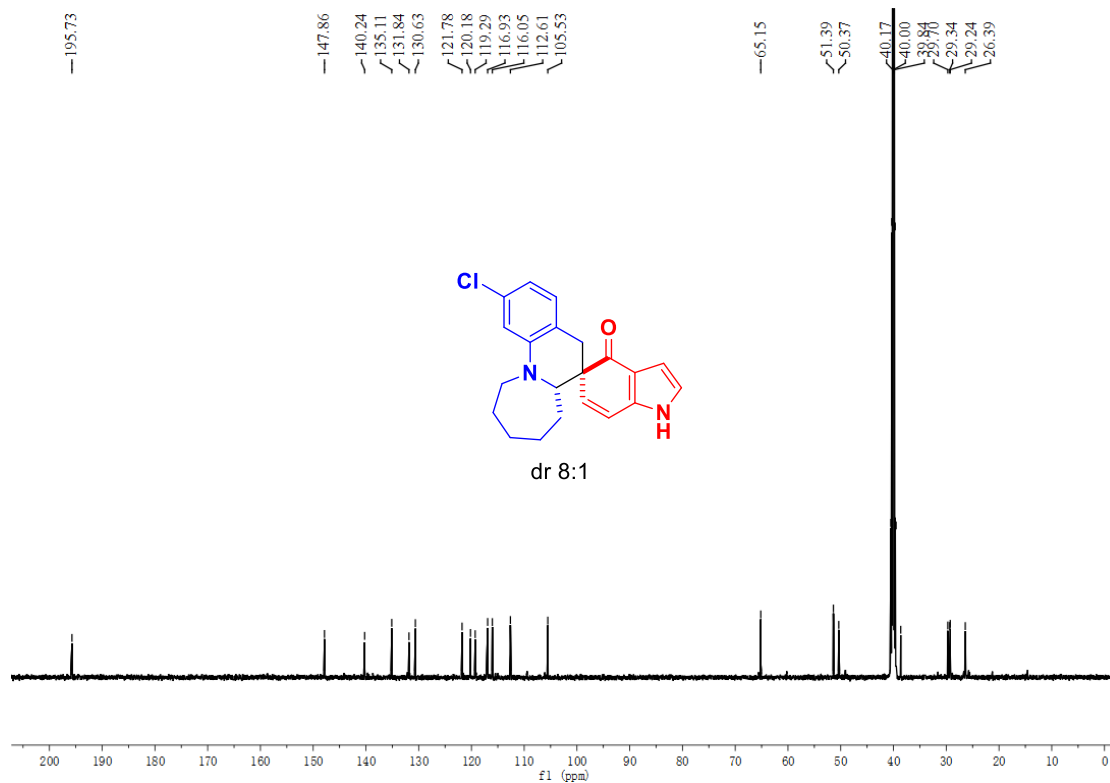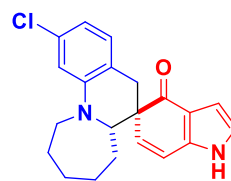

dr 8:1

**2-bromo-6a,7,8,9,10,11-hexahydro-5H-spiro[azepino[1,2-a]quinoline-6,5'-indol]-4'(1'H)-one  
(3s)**

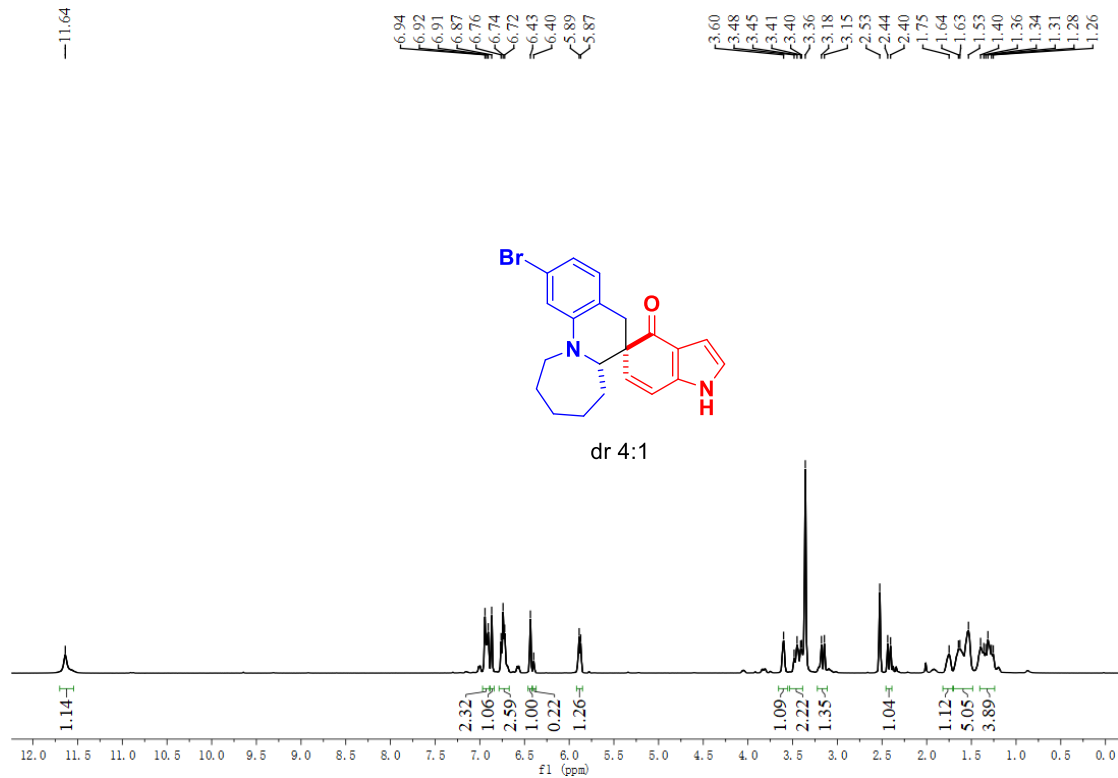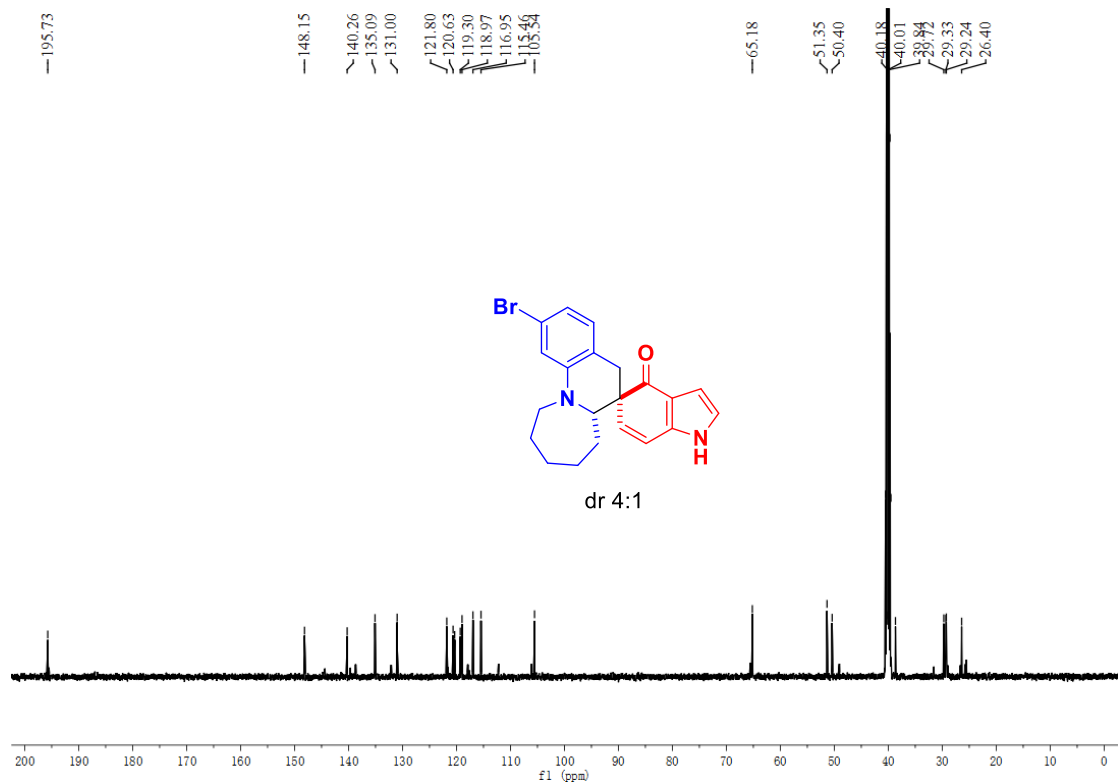

2-phenyl-1',2',3',3a'-tetrahydro-5'H-spiro[indole-5,4'-pyrrolo[1,2-a]quinolin]-4(1H)-one (3t)

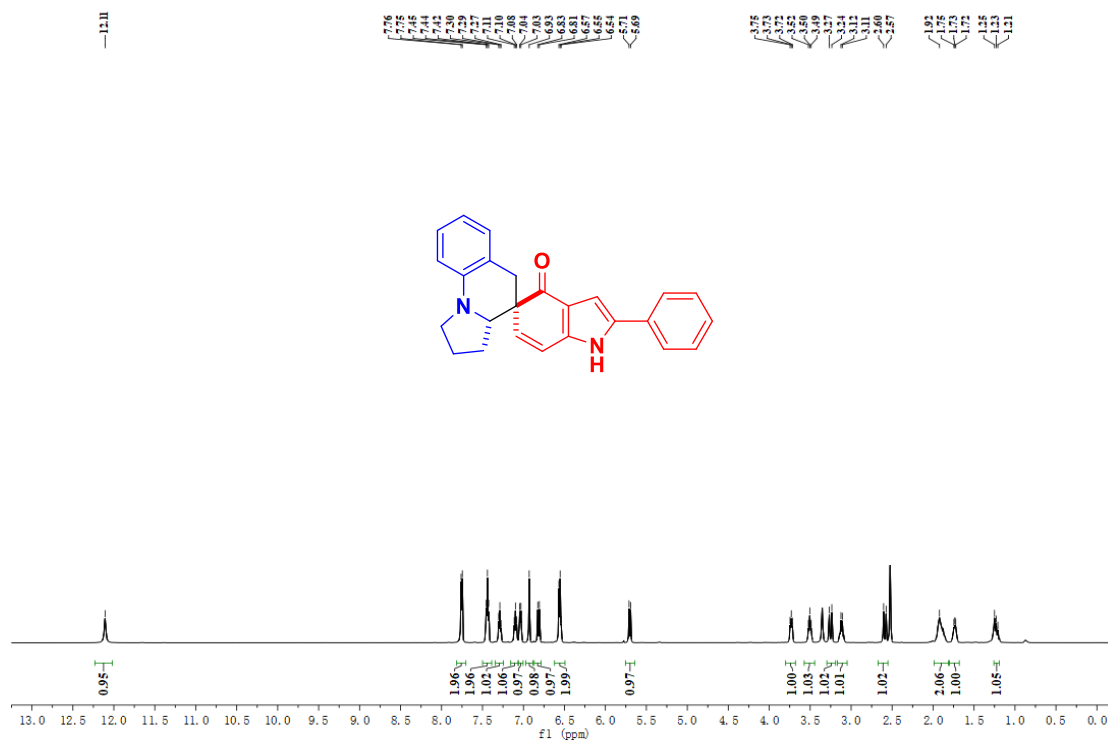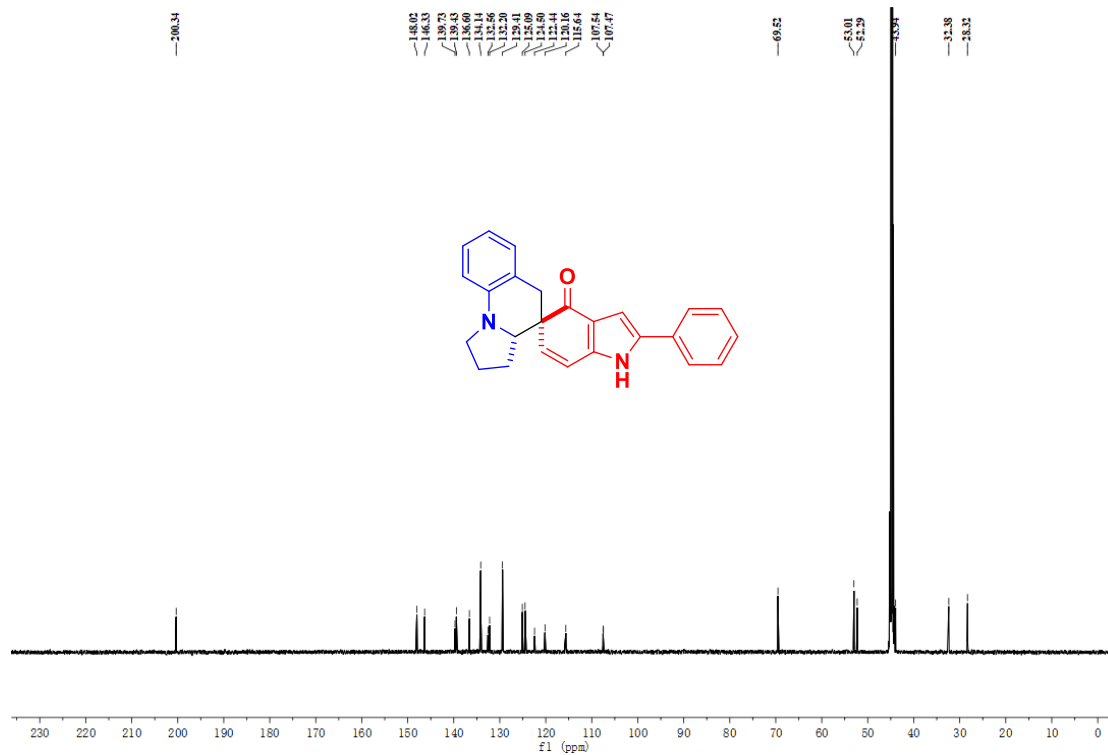

2-(*p*-tolyl)-1',2',3',3a'-tetrahydro-5'*H*-spiro[indole-5,4'-pyrrolo[1,2-*a*]quinolin]-4(1*H*)-one (3u)

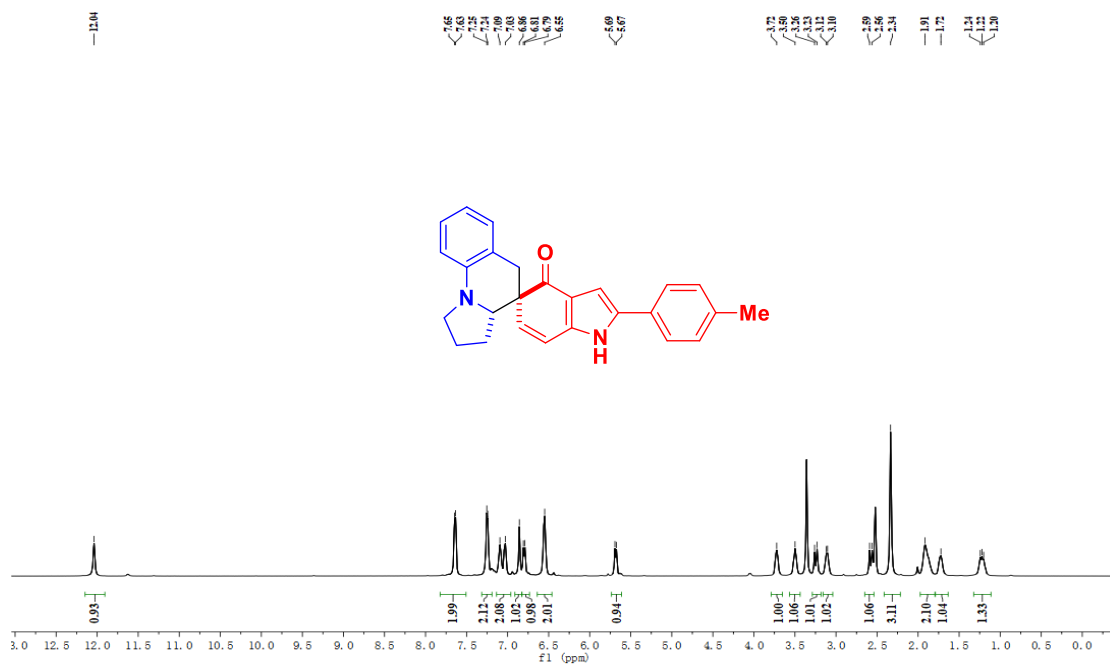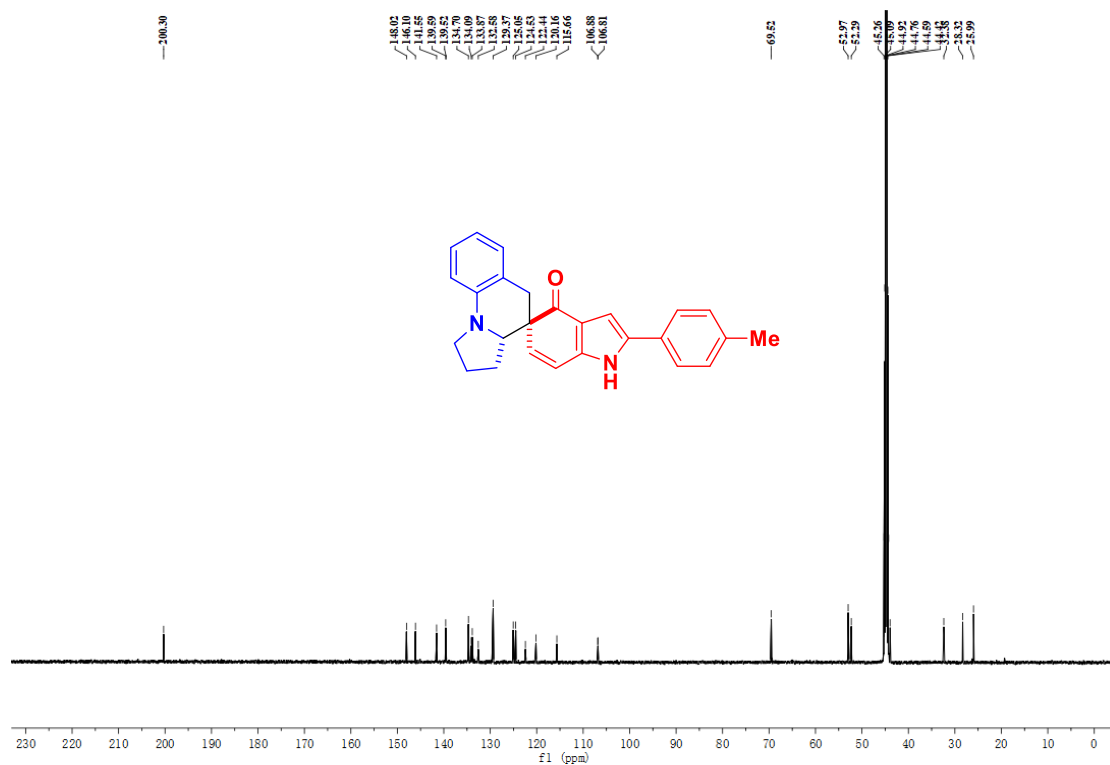



**2-(4-fluorophenyl)-1',2',3',3a'-tetrahydro-5'H-spiro[indole-5,4'-pyrrolo[1,2-a]quinolin]-4(1H)-one (3v)**

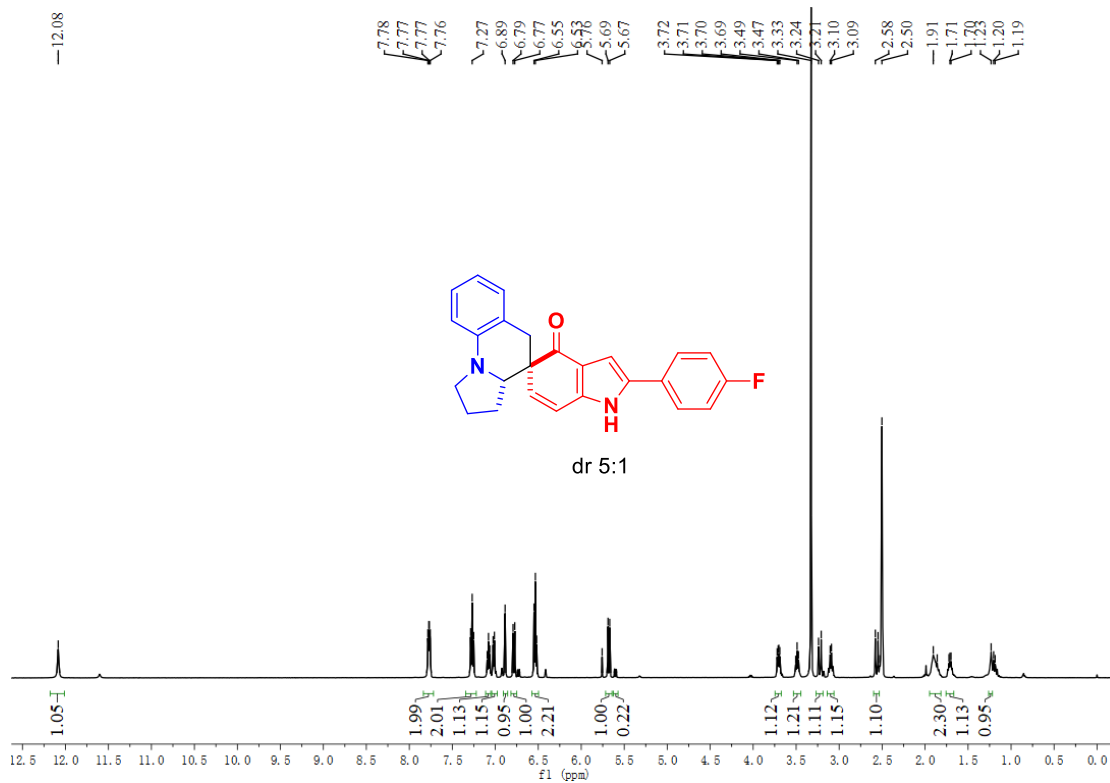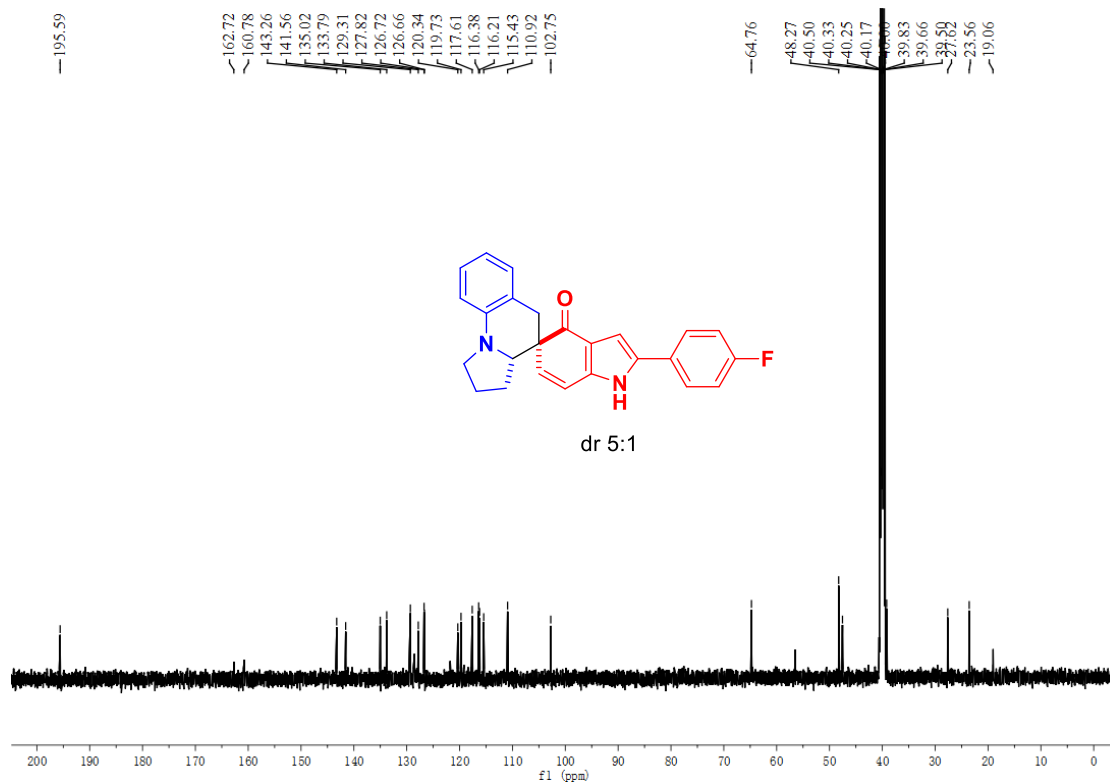

1',2',3',3a'-tetrahydro-5'H-spiro[carbazole-3,4'-pyrrolo[1,2-a]quinolin]-4(9H)-one (5a)

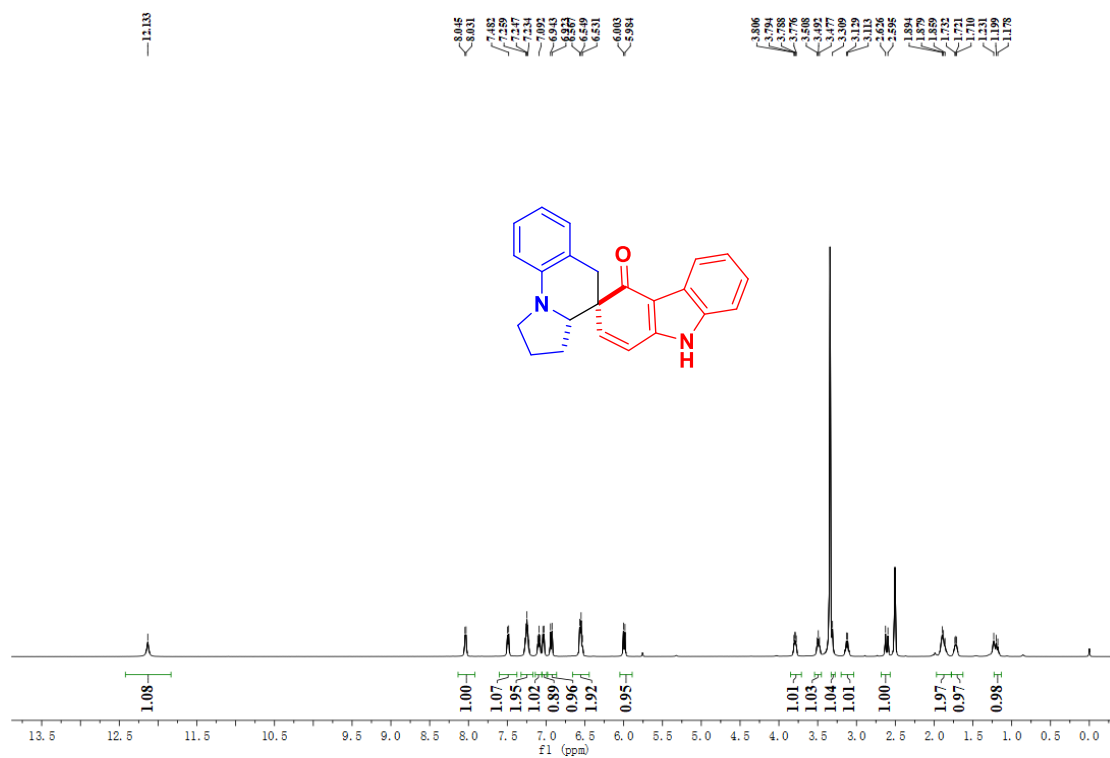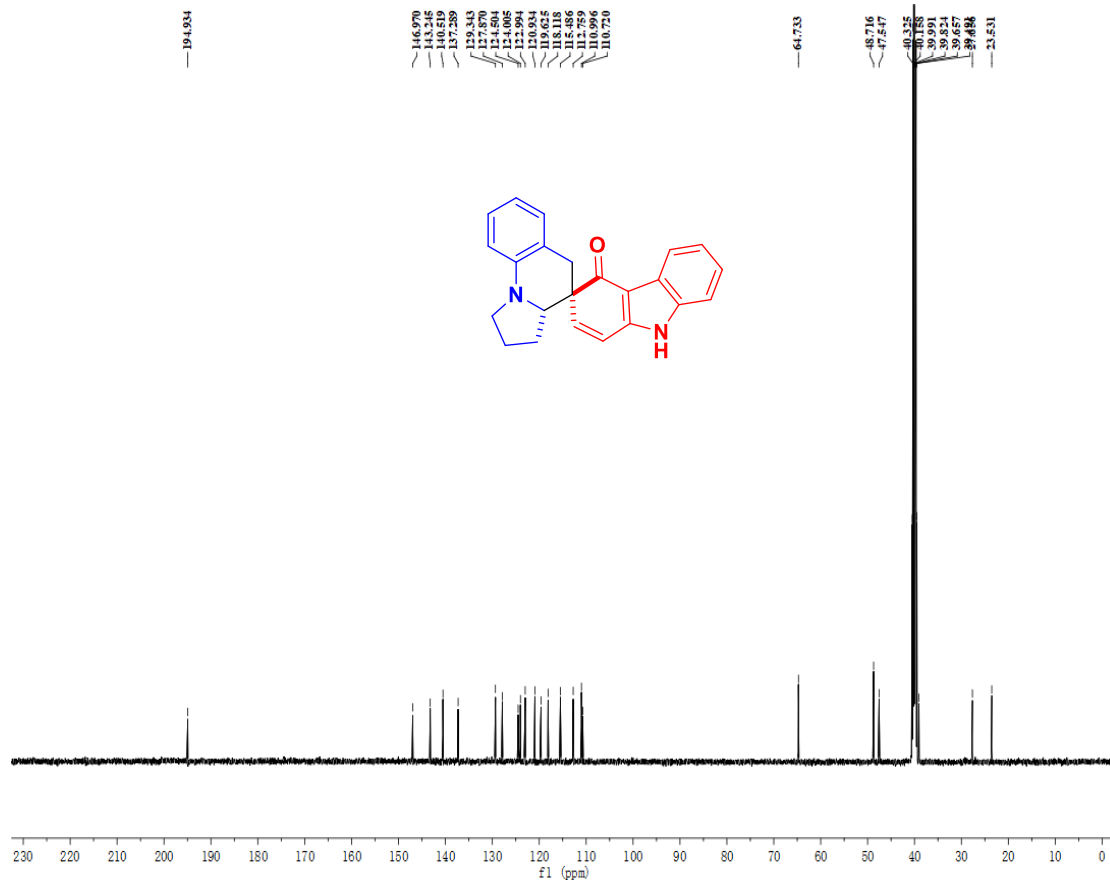

**8'-methyl-1',2',3',3a'-tetrahydro-5'H-spiro[carbazole-3,4'-pyrrolo[1,2-a]quinolin]-4(9H)-one (5b)**

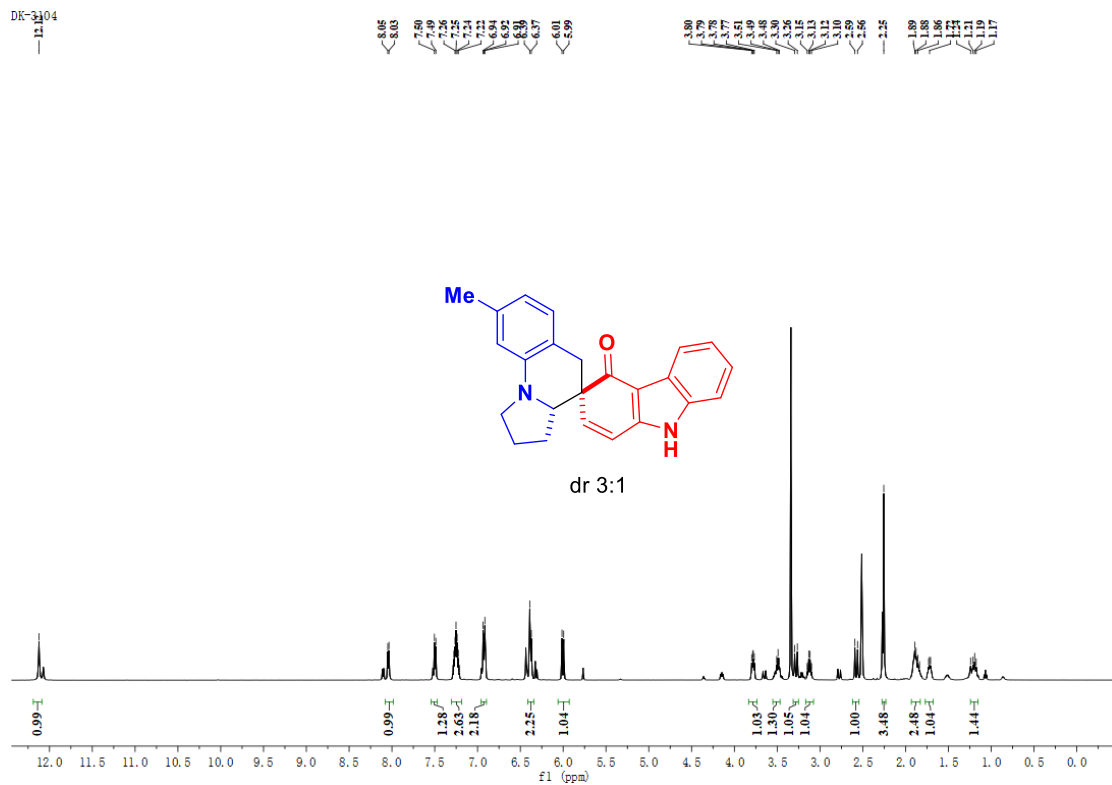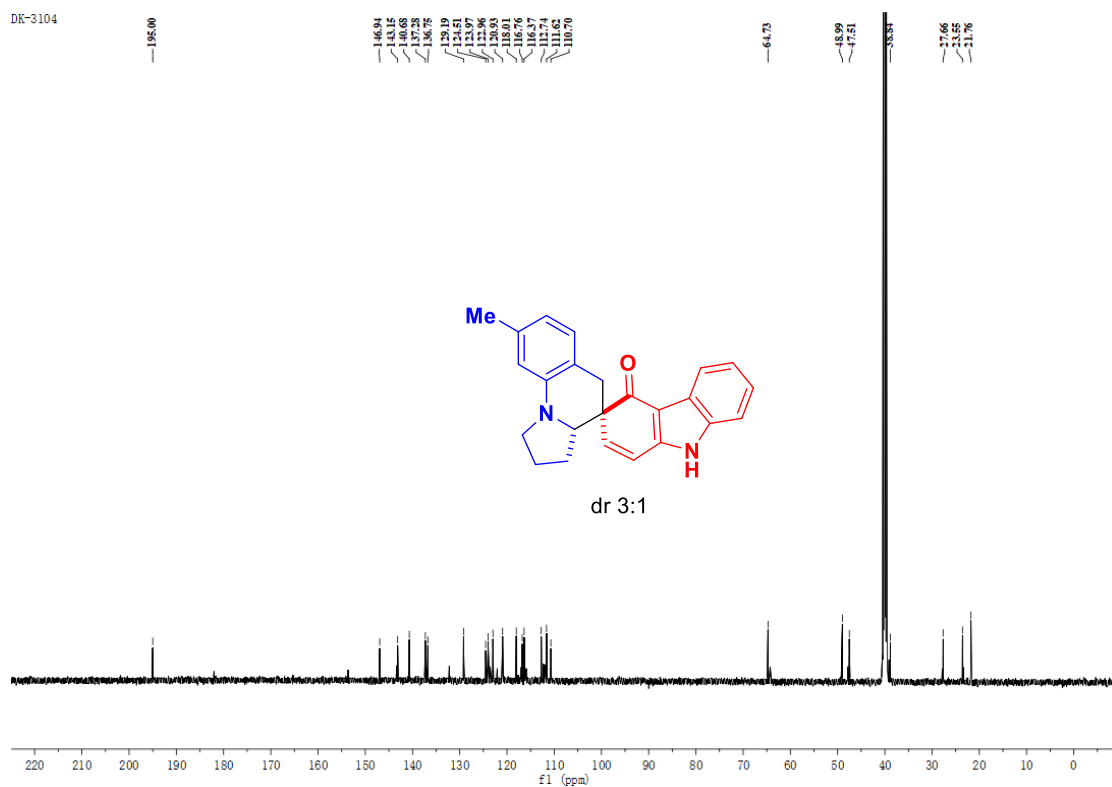

**8'-(trifluoromethyl)-1',2',3',3a'-tetrahydro-5'H-spiro[carbazole-3,4'-pyrrolo[1,2-a]quinolin]-4(9H)-one (5c)**

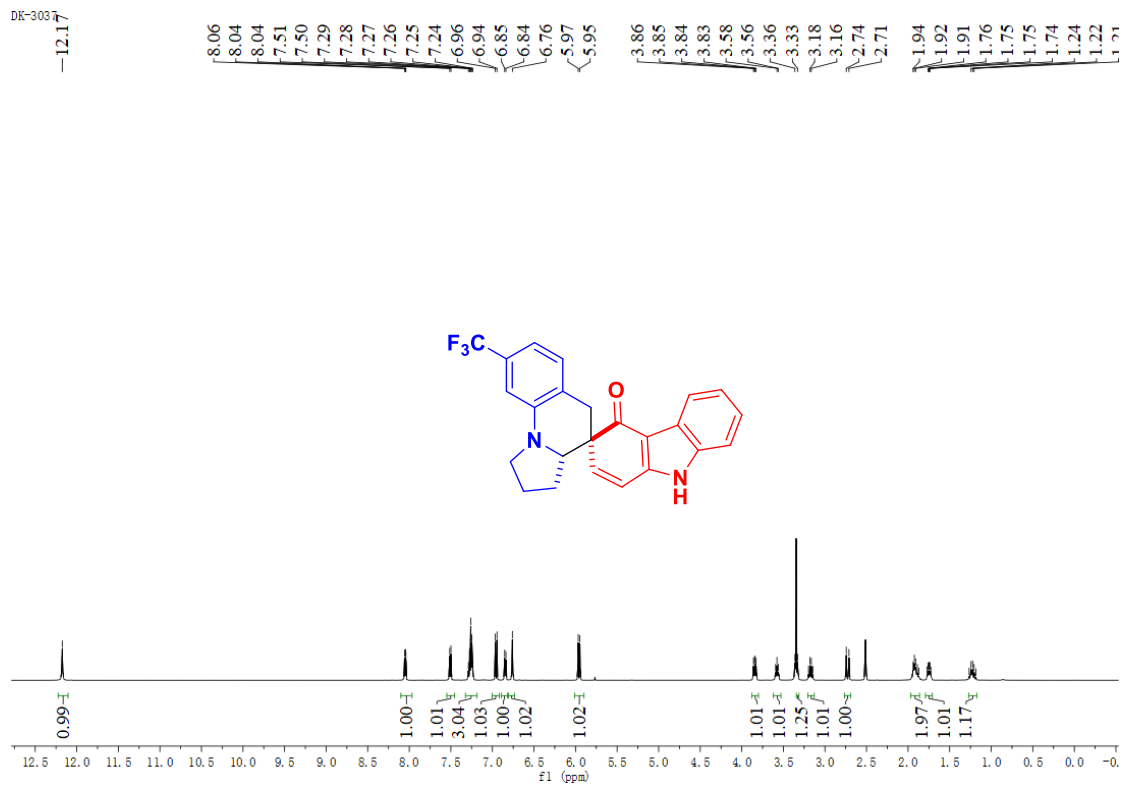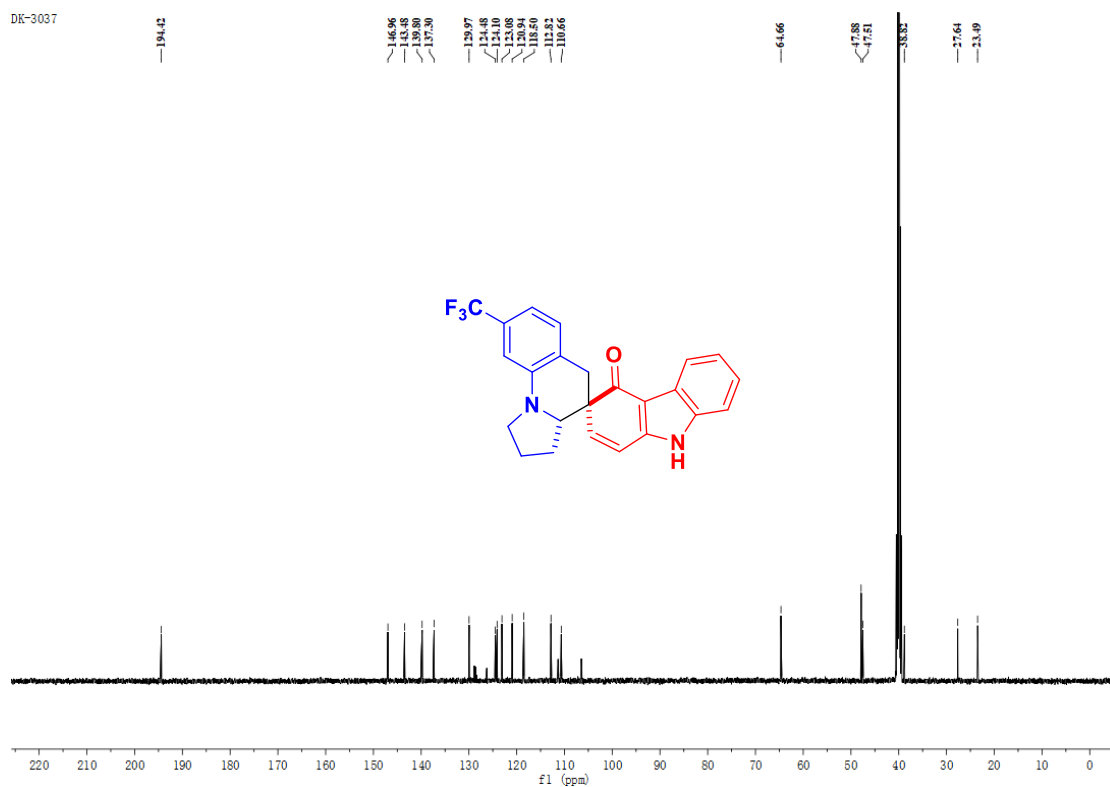

7'-chloro-1',2',3',3a'-tetrahydro-5'H-spiro[carbazole-3,4'-pyrrolo[1,2-a]quinolin]-4(9H)-one  
(5d)

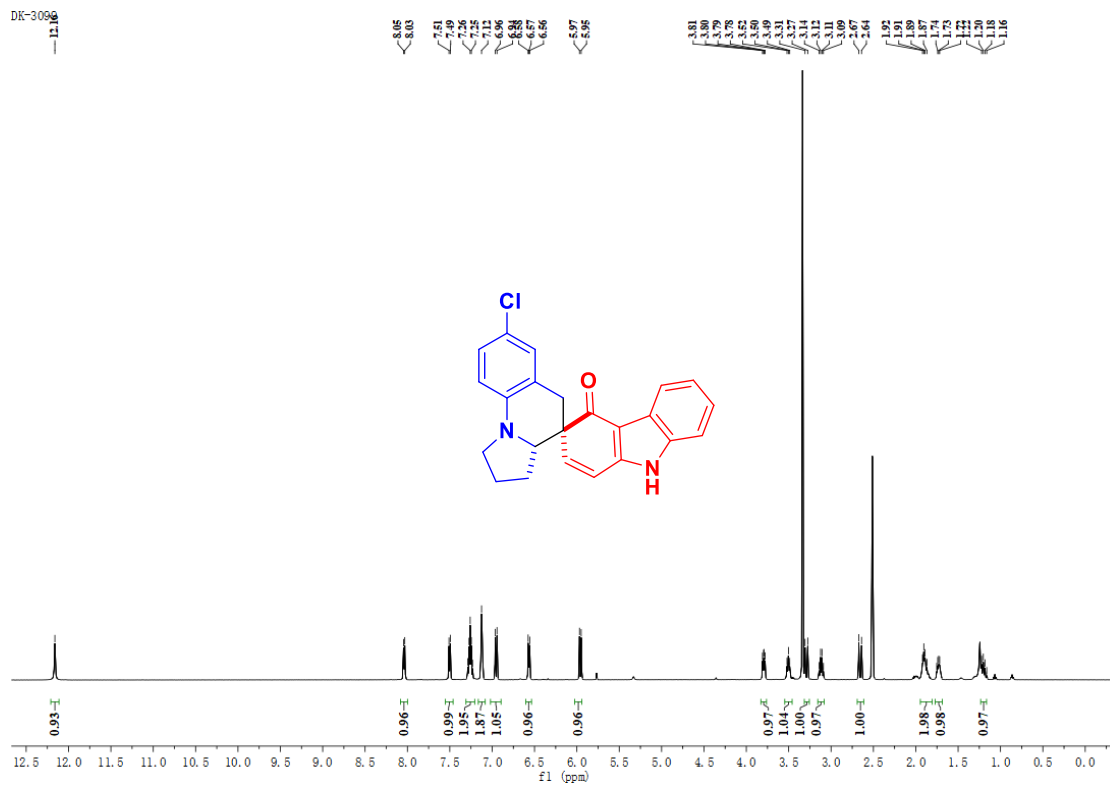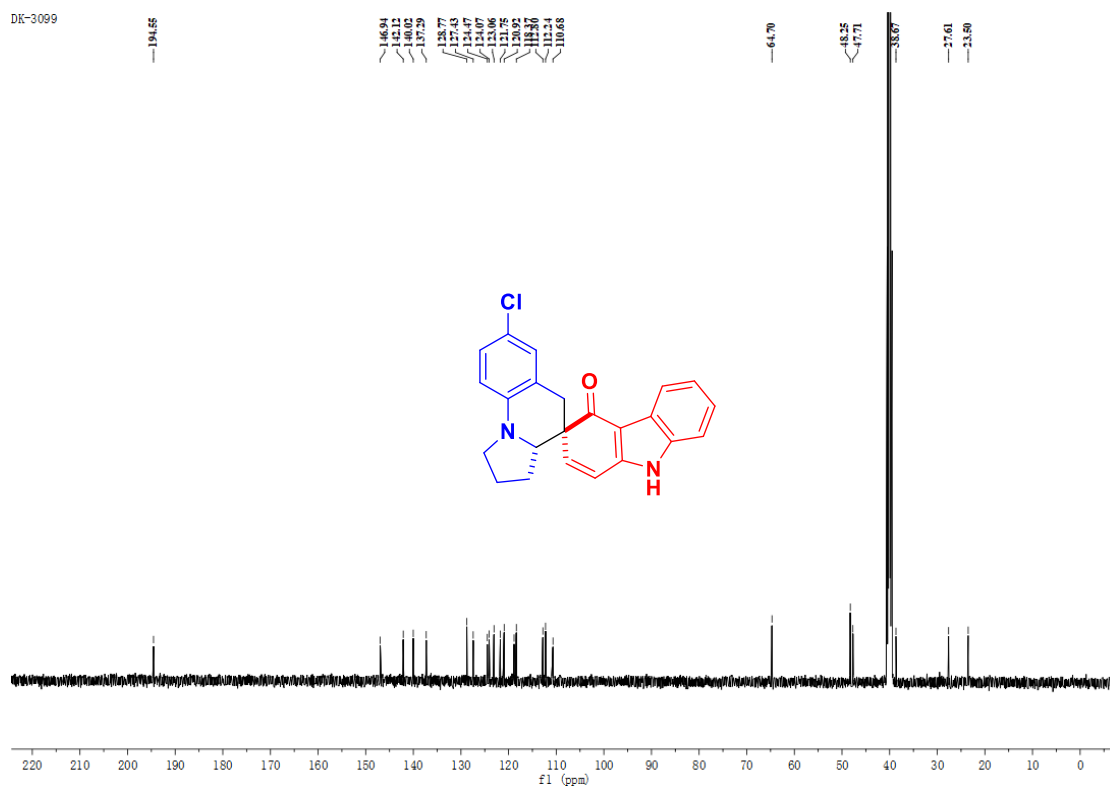

**6'-methoxy-1',2',3',3a'-tetrahydro-5'H-spiro[carbazole-3,4'-pyrrolo[1,2-a]quinolin]-4(9H)-one (5e)**

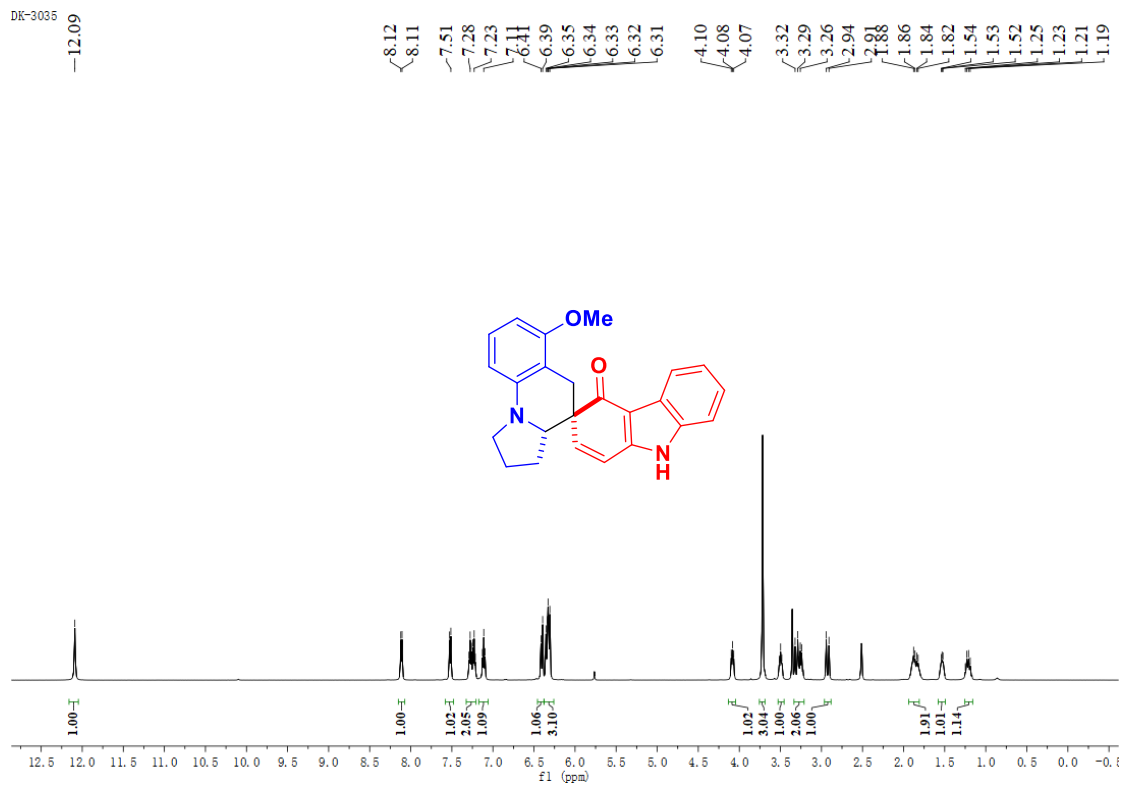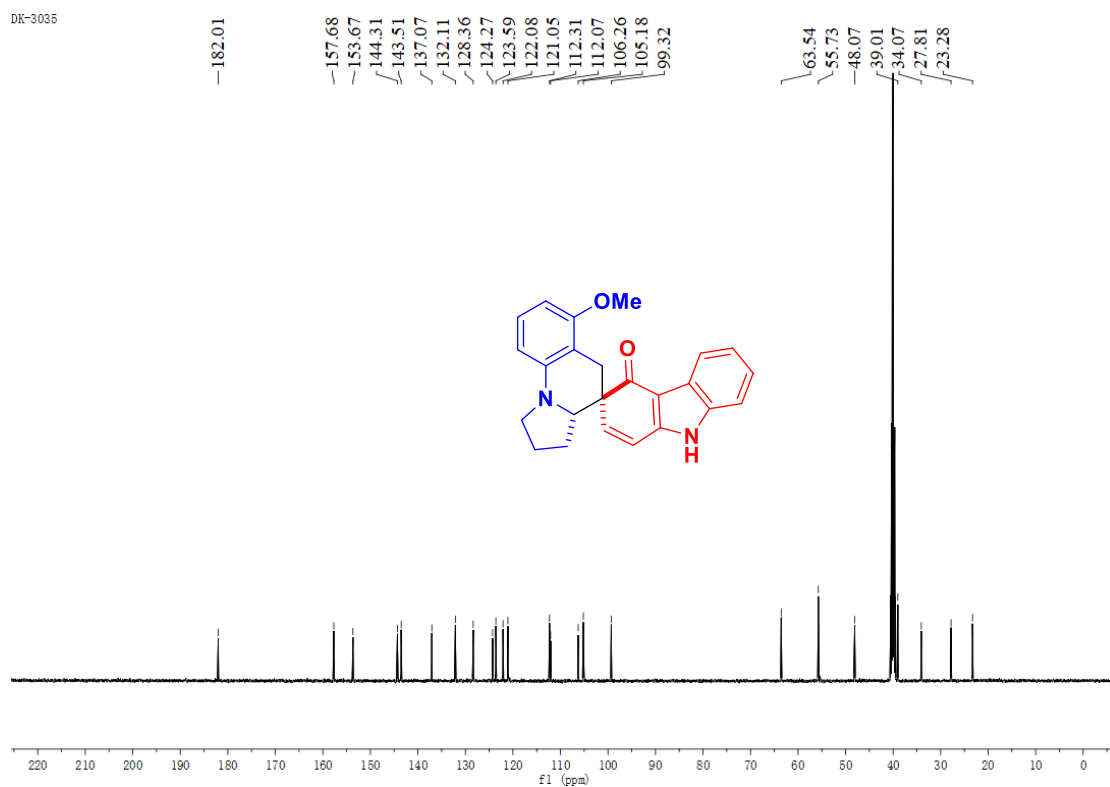

**6'-fluoro-1',2',3',3a'-tetrahydro-5'H-spiro[carbazole-3,4'-pyrrolo[1,2-a]quinolin]-4(9H)-one (5f)**

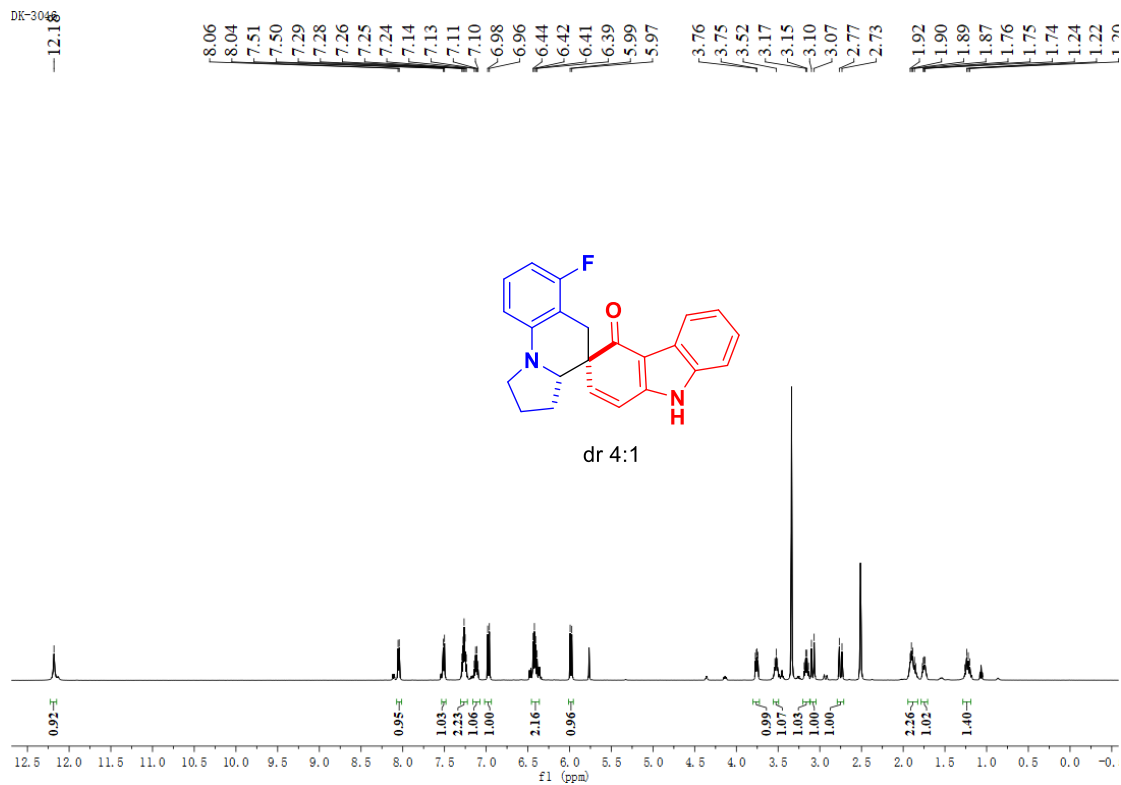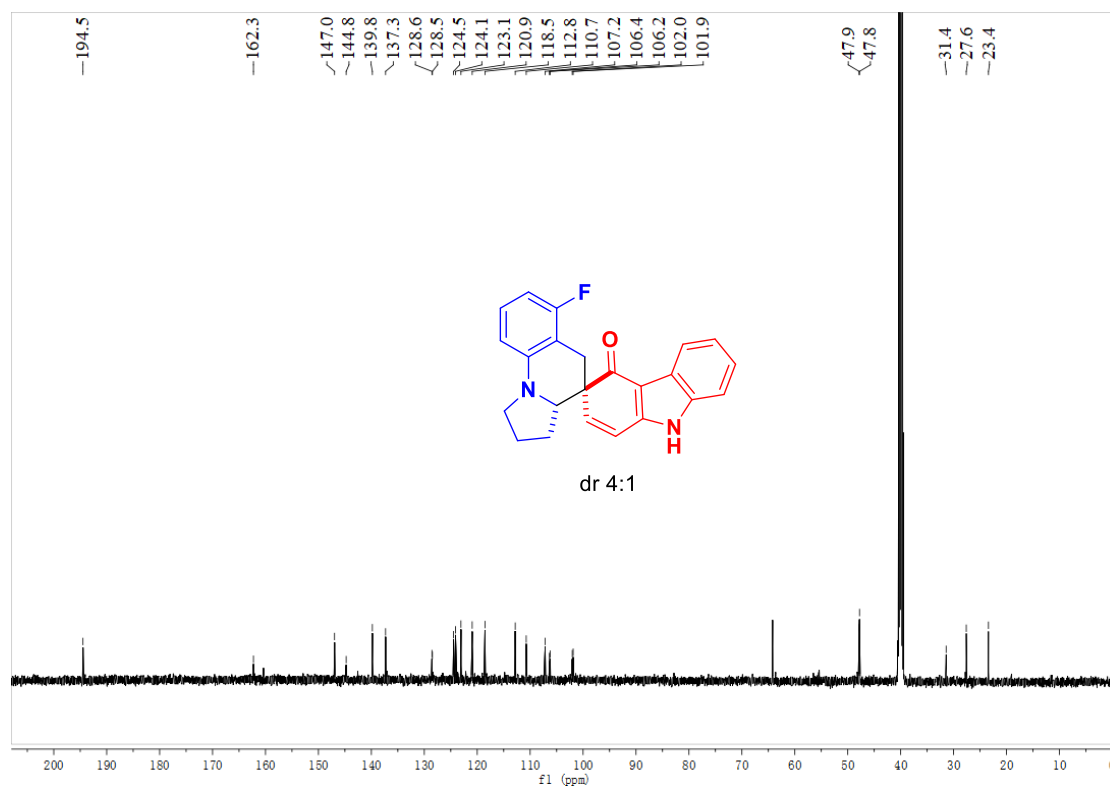

**6'-bromo-1',2',3',3a'-tetrahydro-5'H-spiro[carbazole-3,4'-pyrrolo[1,2-a]quinolin]-4(9H)-one (5g)**

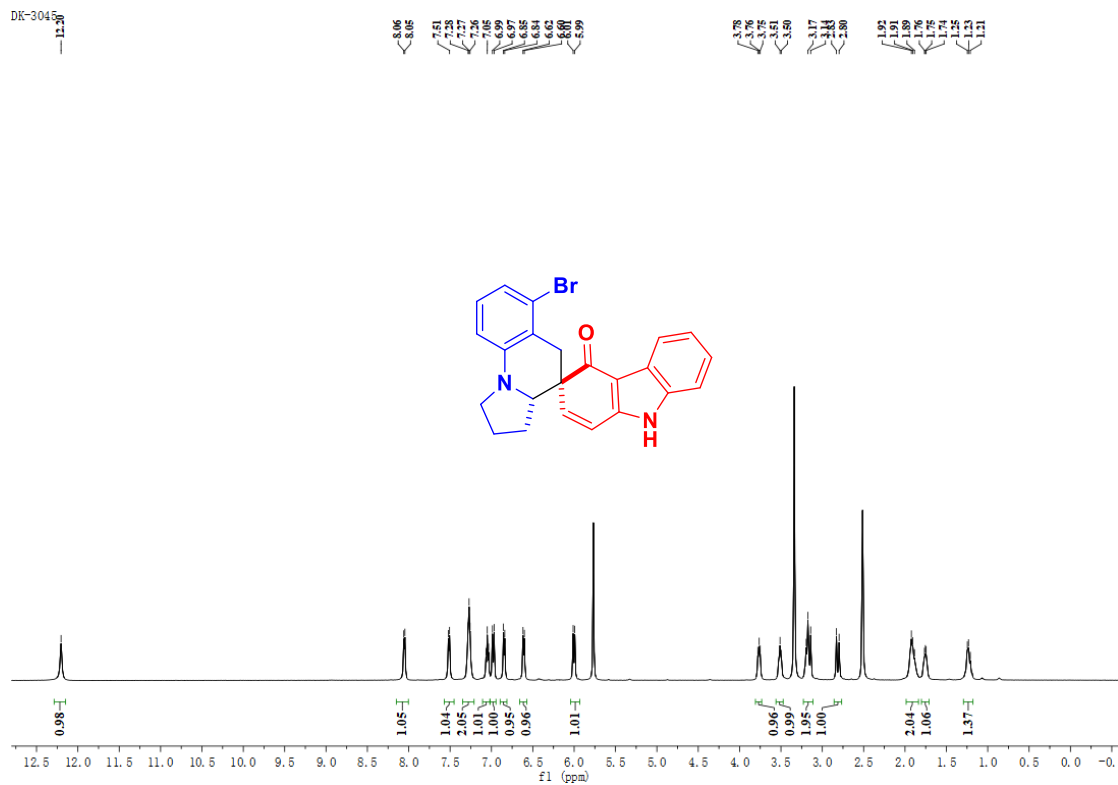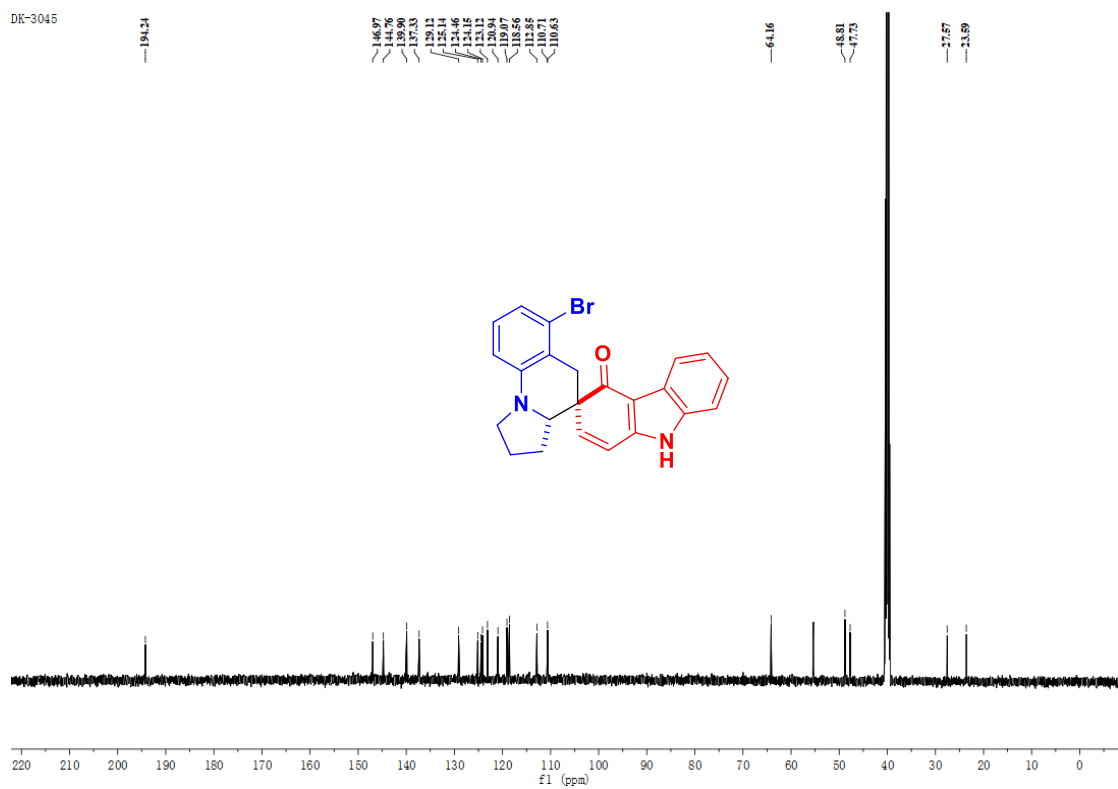



**4-fluoro-6a,7,8,9,10,11-hexahydro-5H-spiro[azepino[1,2-a]quinoline-6,3'-carbazol]-4'(9'H)-one (5h)**

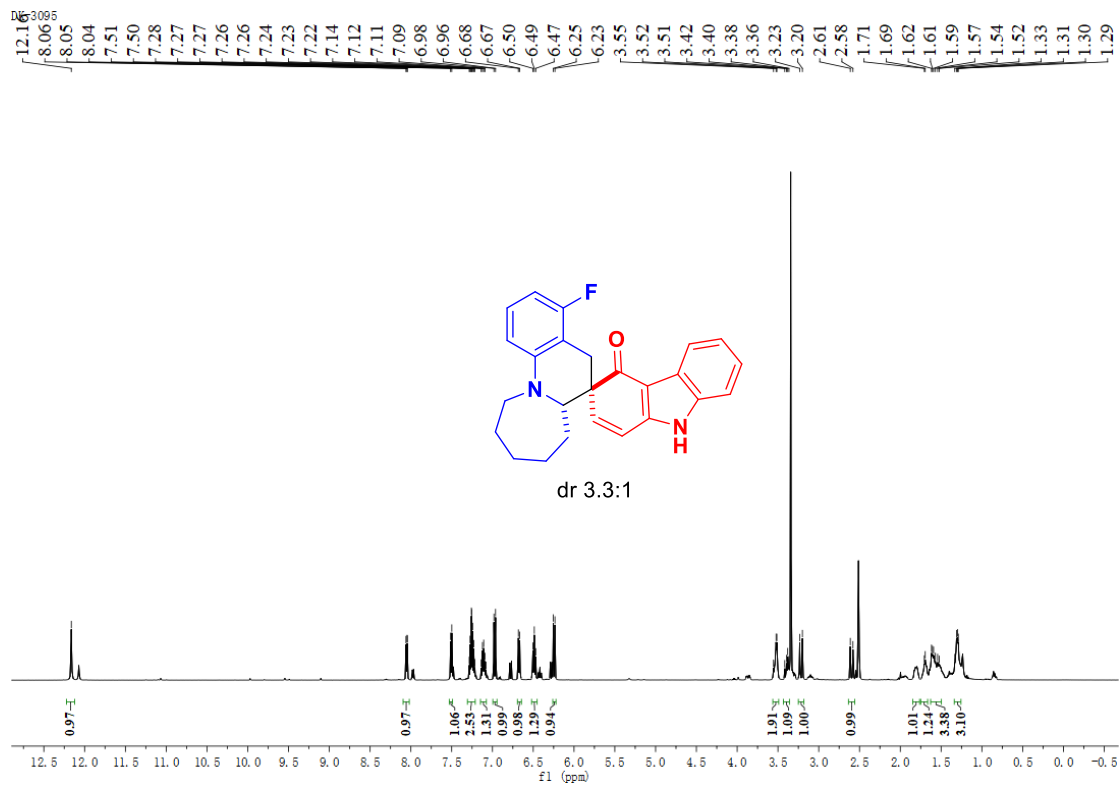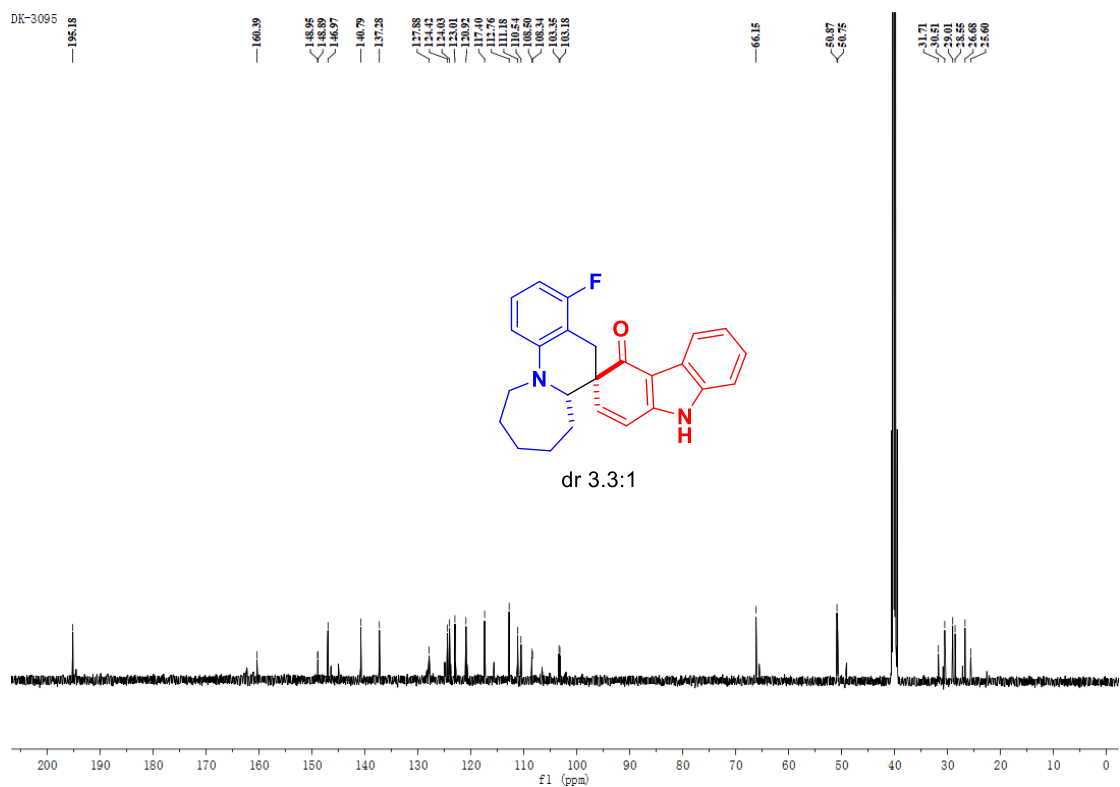

**4-chloro-6a,7,8,9,10,11-hexahydro-5H-spiro[azepino[1,2-a]quinoline-6,3'-carbazol]-4'(9'H)-one (5i)**

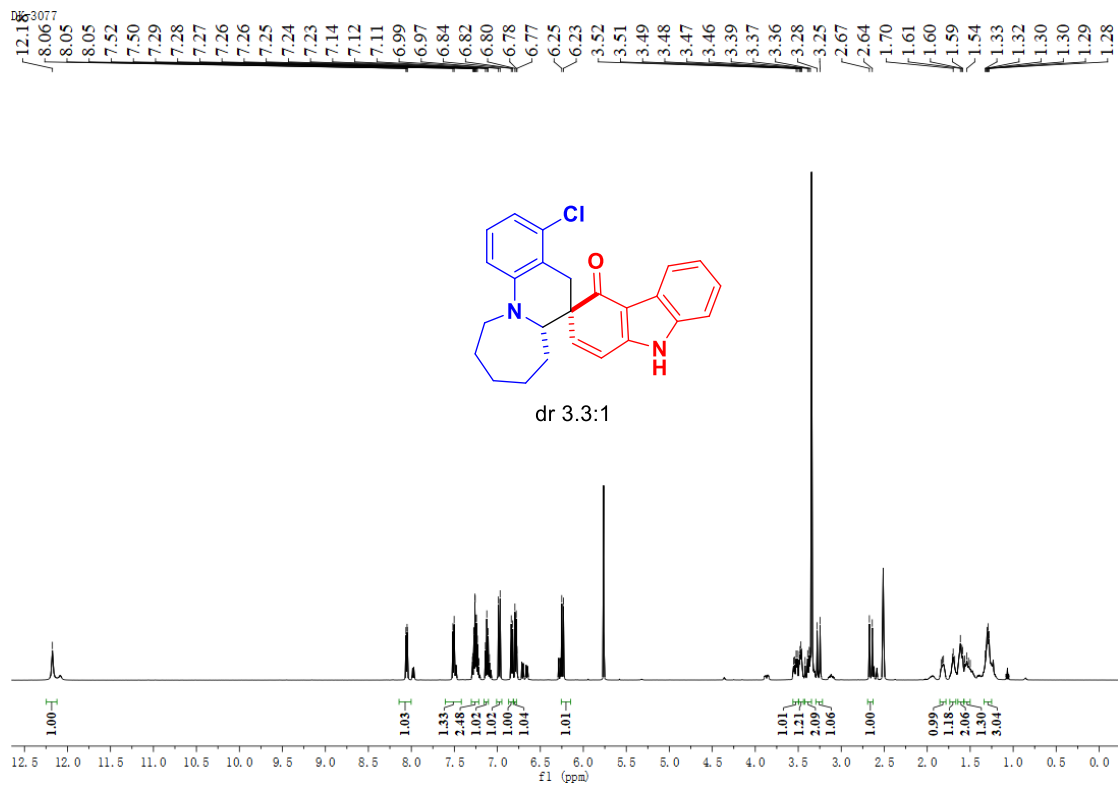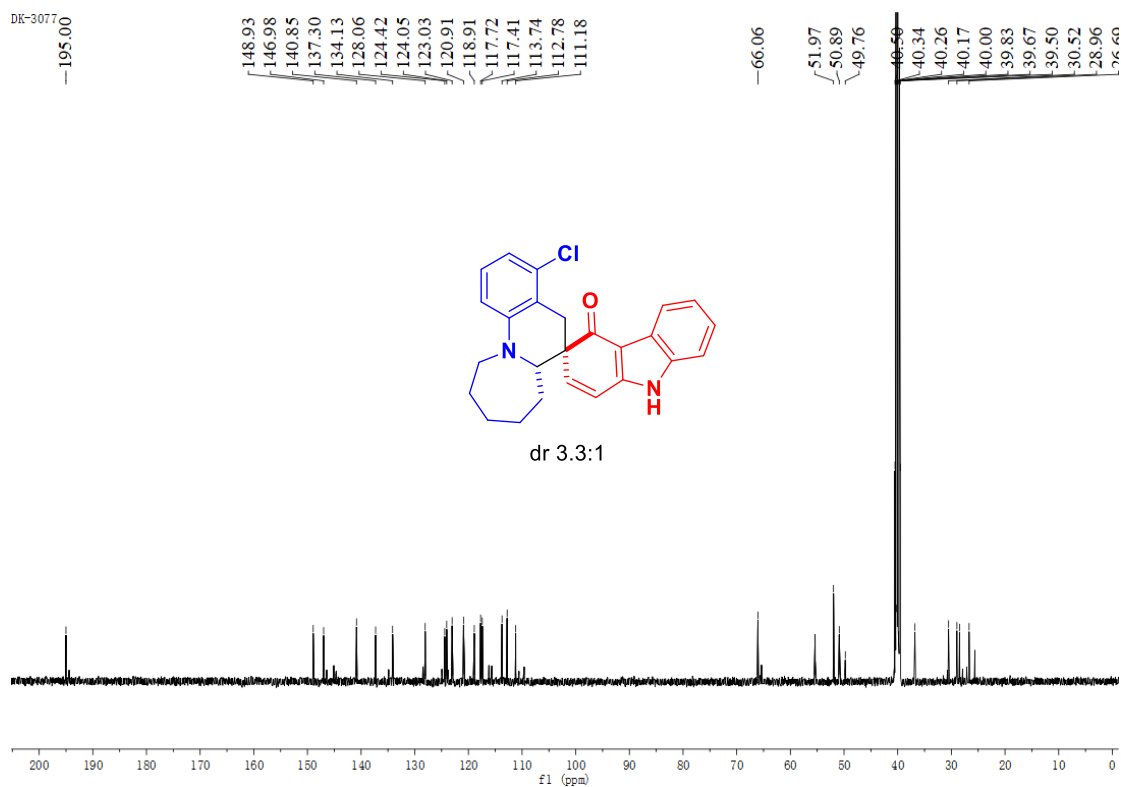

1',2',3',3a'-tetrahydro-5'H-spiro[indole-3,4'-pyrrolo[1,2-a]quinolin]-4-ol (7a)

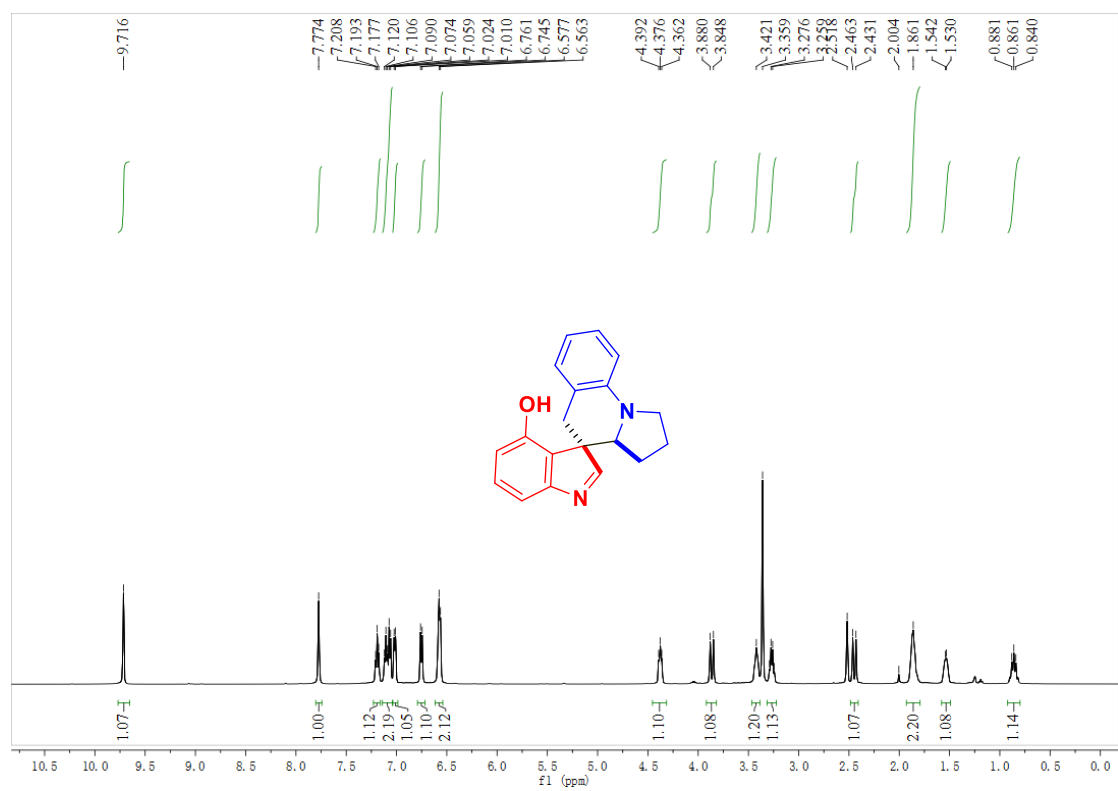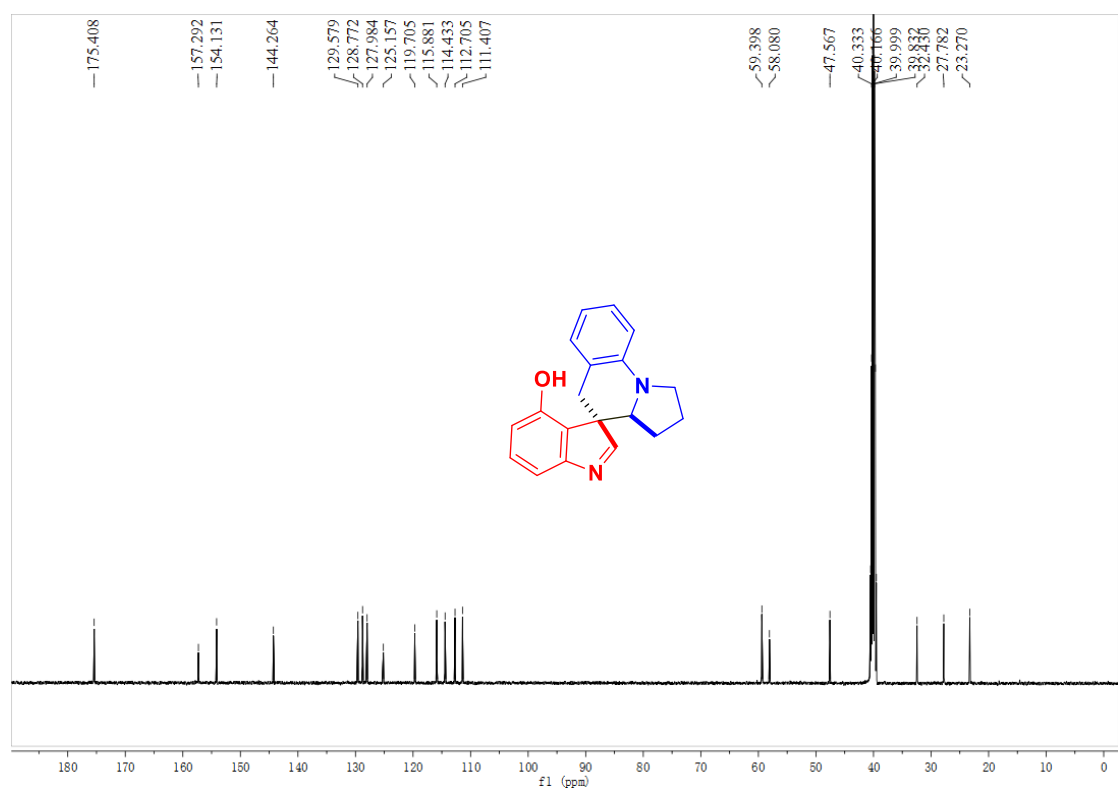

7'-chloro-1',2',3',3a'-tetrahydro-5'H-spiro[indole-3,4'-pyrrolo[1,2-a]quinolin]-4-ol (7b)

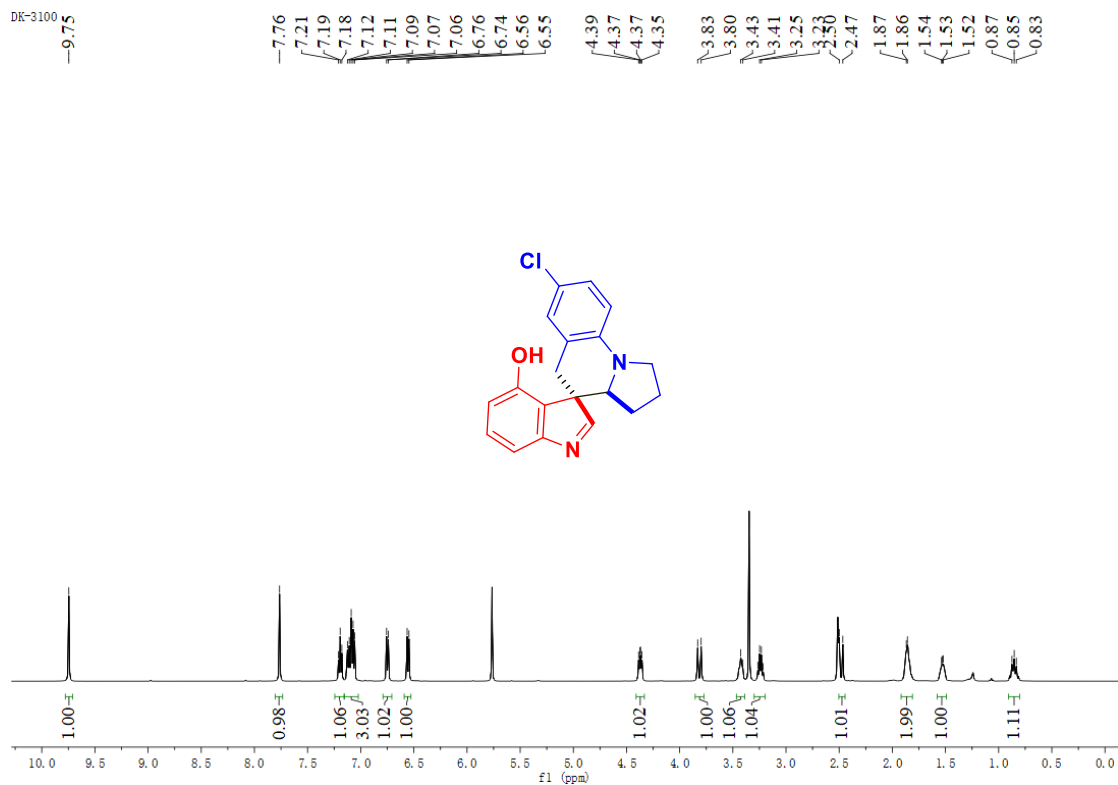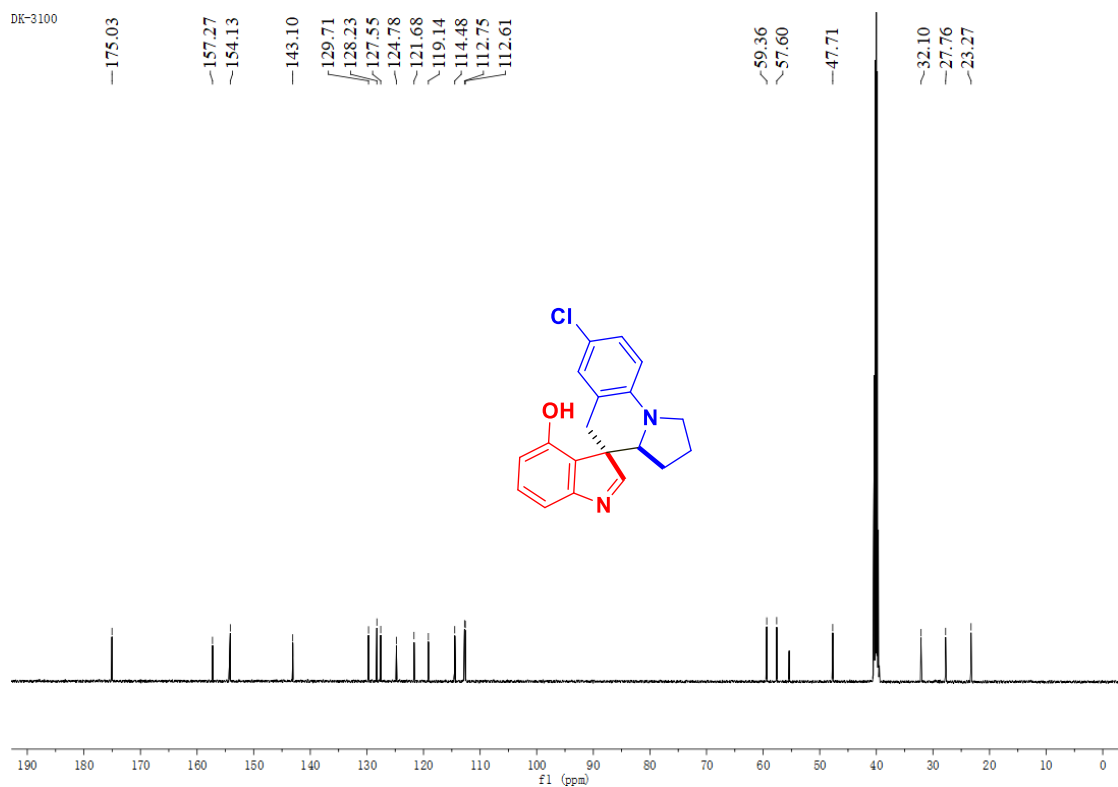

7'-bromo-1',2',3',3a'-tetrahydro-5'H-spiro[indole-3,4'-pyrrolo[1,2-a]quinolin]-4-ol (7c)

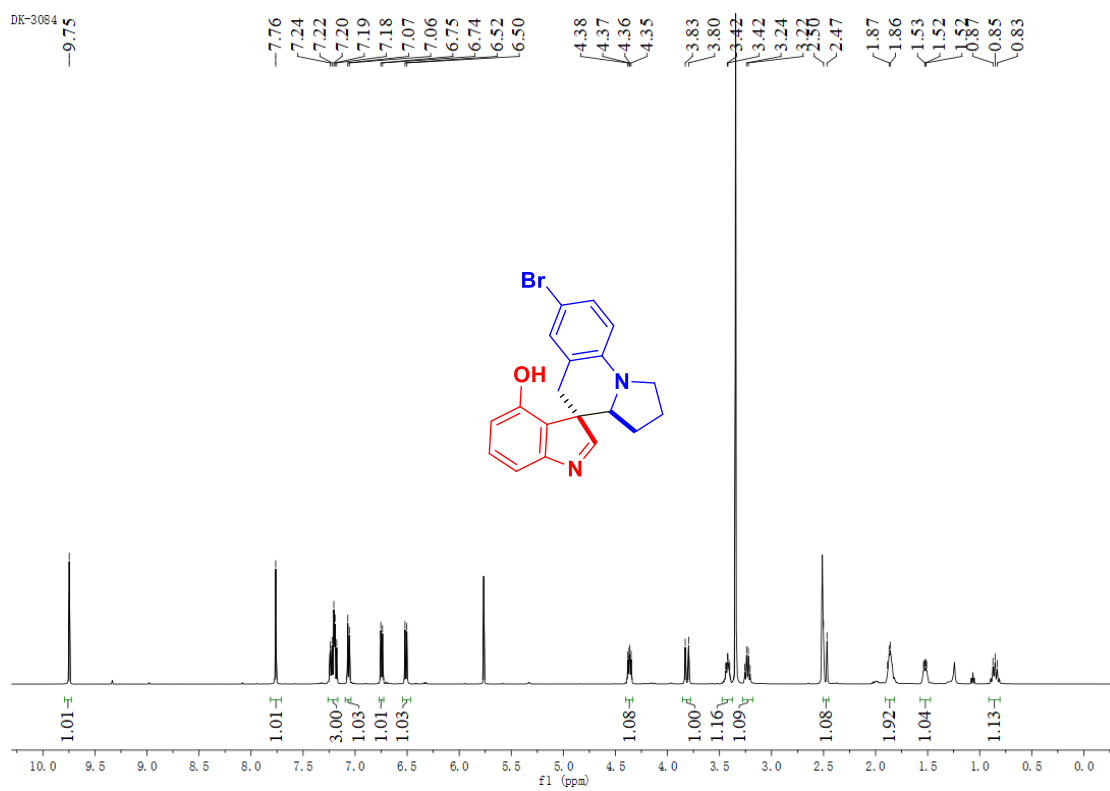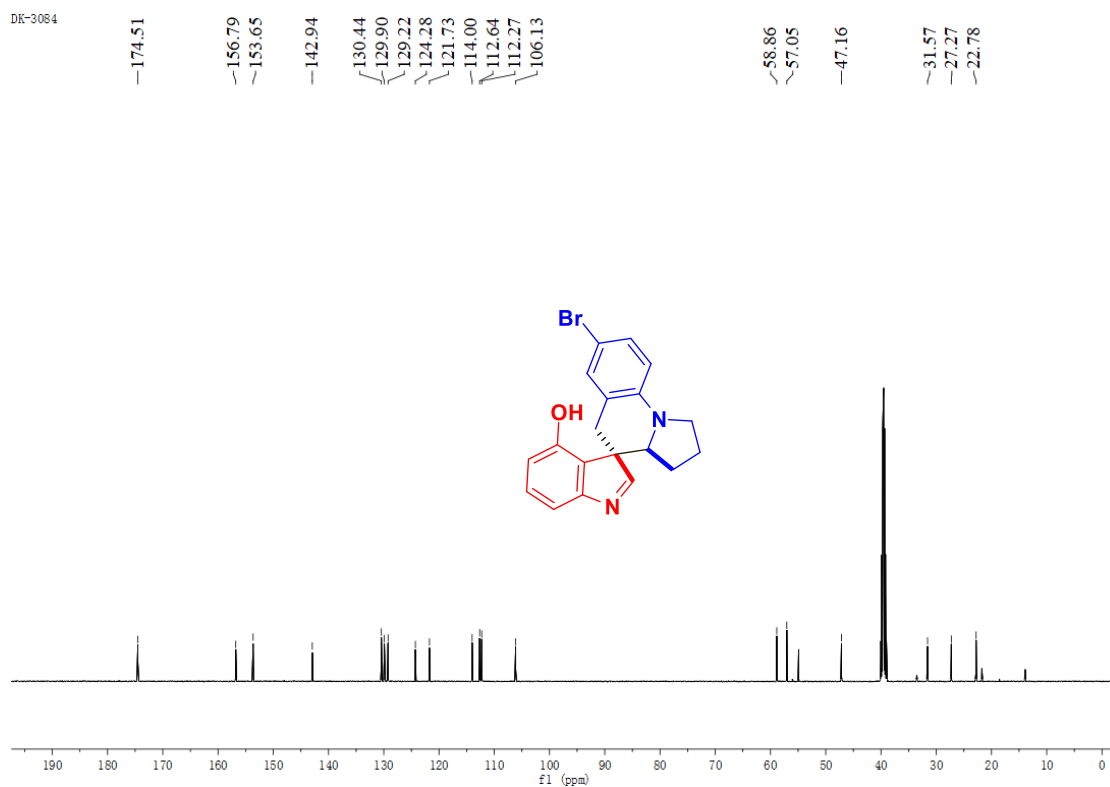

6'-fluoro-1',2',3',3a'-tetrahydro-5'H-spiro[indole-3,4'-pyrrolo[1,2-a]quinolin]-4-ol (7d)

DK-3082

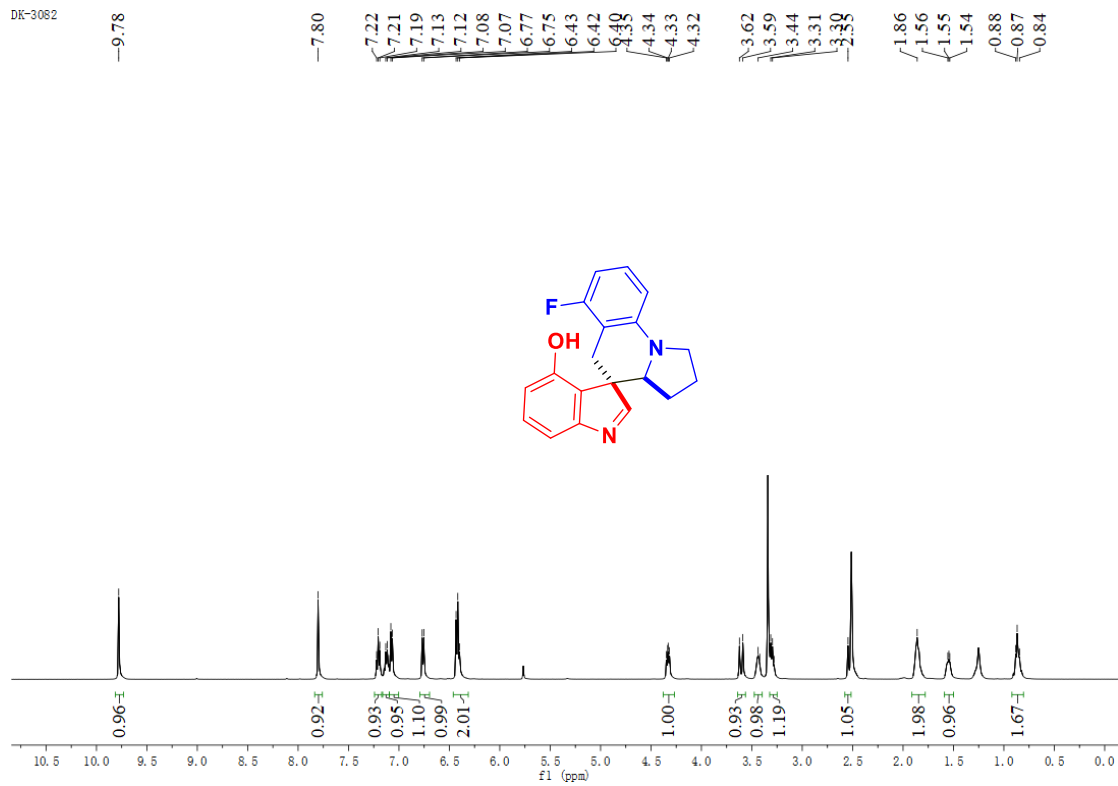

DK-3042

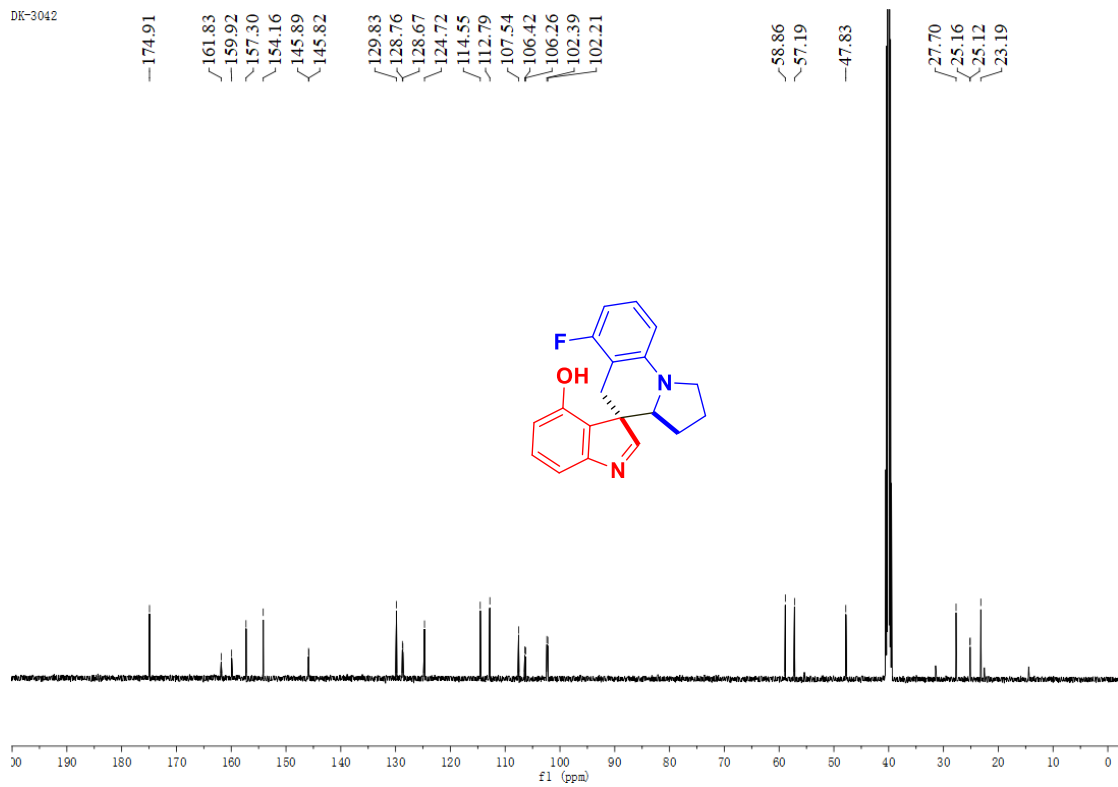

6'-chloro-1',2',3',3a'-tetrahydro-5'H-spiro[indole-3,4'-pyrrolo[1,2-a]quinolin]-4-ol (7e)

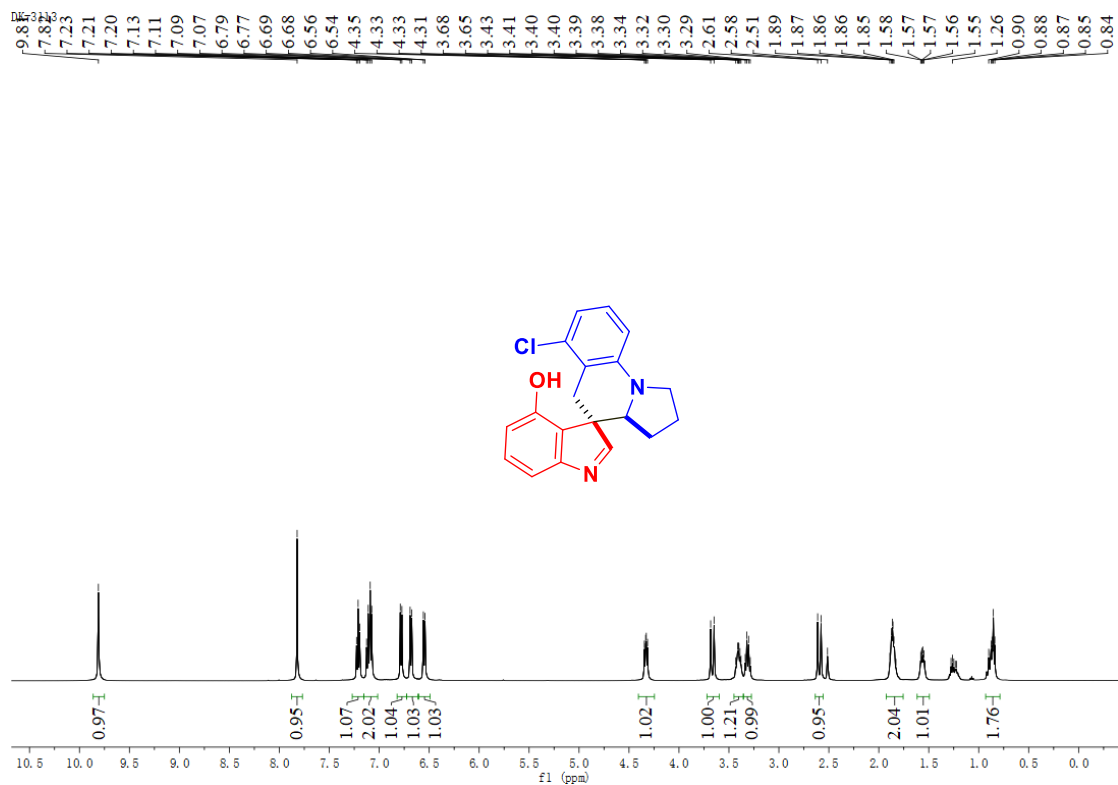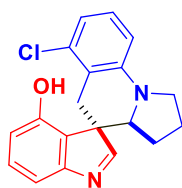

DK-3113

174.98, 157.29, 154.17, 145.75, 133.44, 129.87, 128.81, 124.60, 117.07, 116.19, 114.60, 112.81, 110.39, 58.81, 57.88, 47.75, 30.17, 27.68, 23.31

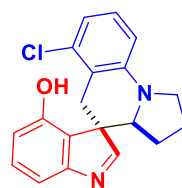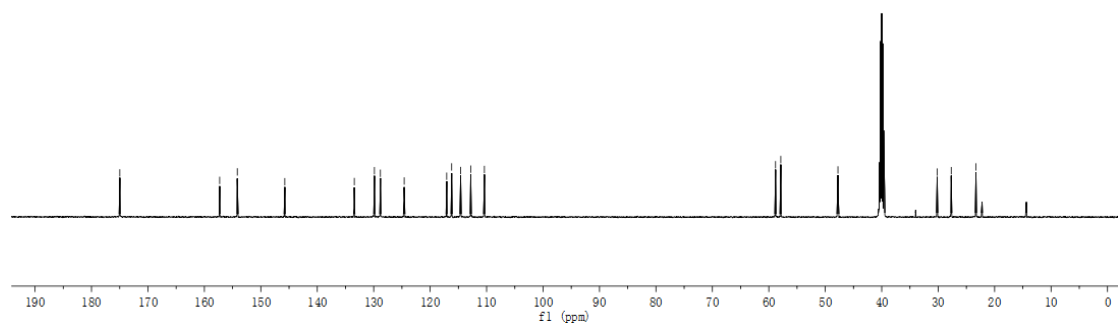

6'-bromo-1',2',3',3a'-tetrahydro-5'H-spiro[indole-3,4'-pyrrolo[1,2-a]quinolin]-4-ol (7f)

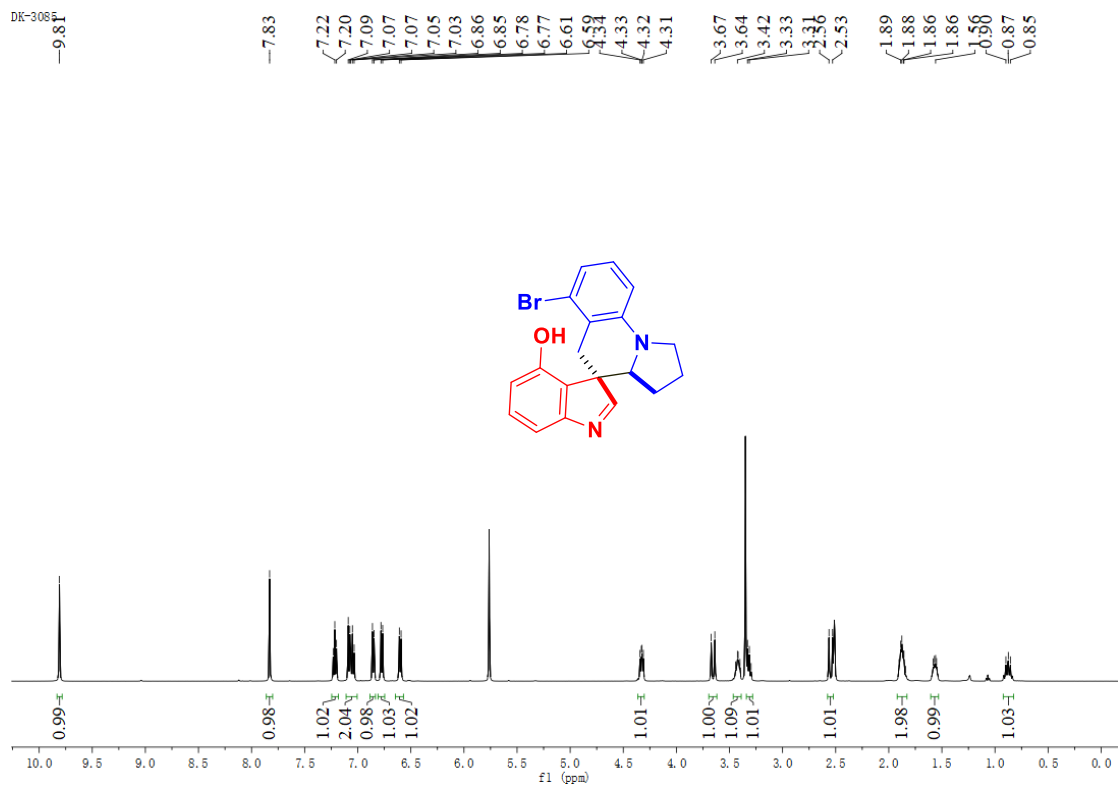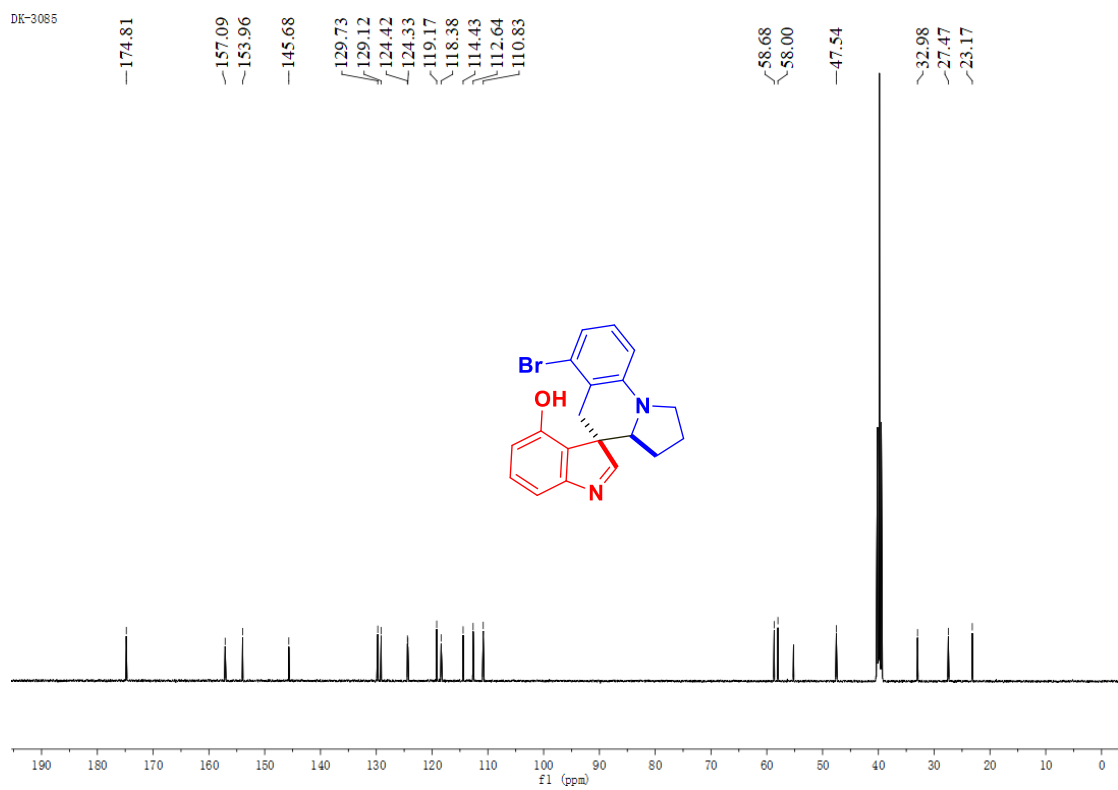



3-bromo-6a,7,8,9,10,11-hexahydro-5H-spiro[azepino[1,2-a]quinoline-6,3'-indol]-4'-ol (7g)

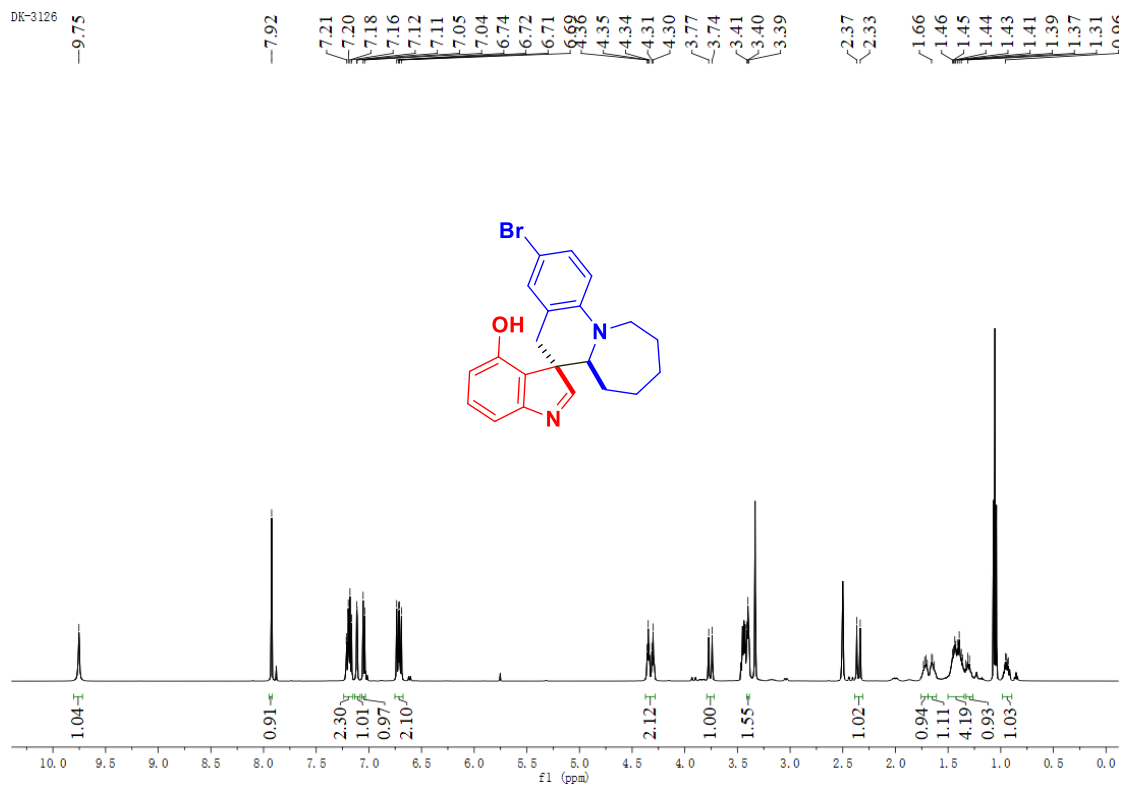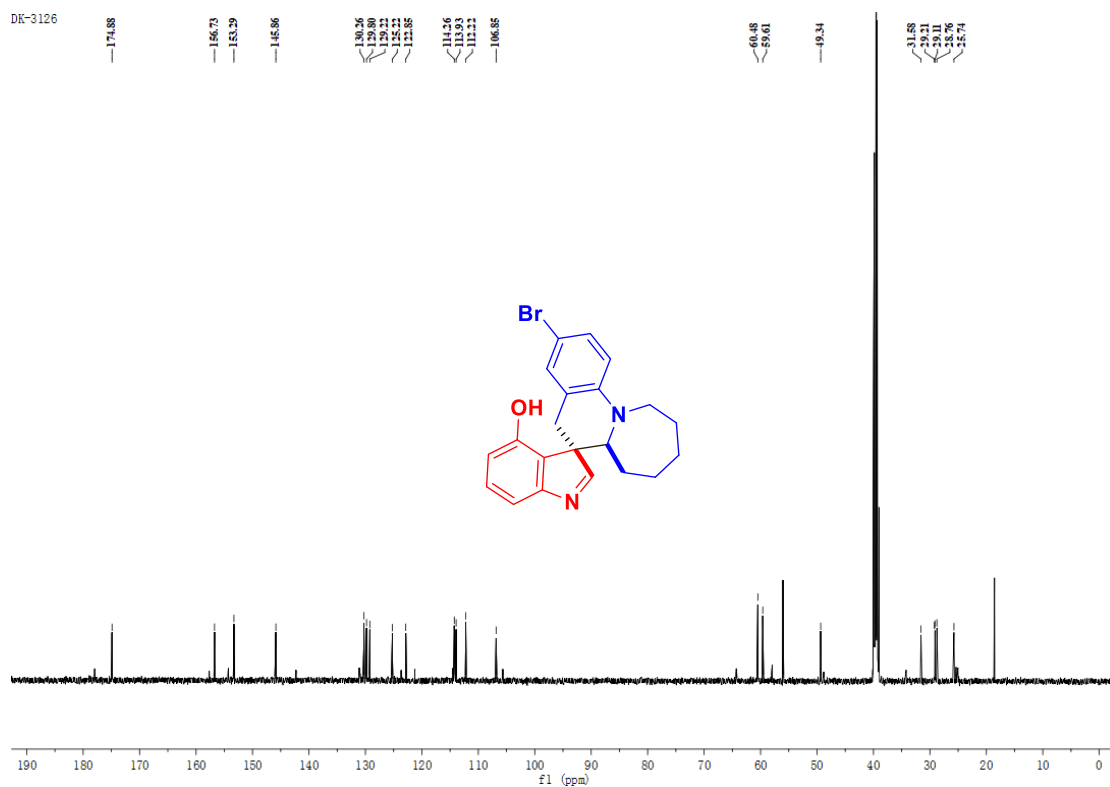

Supplement: d0qo00658k1.pdf [file d0qo00658k1.pdf]
